1 **Non-cancer stem cell-derived Fibromodulin activates Integrin-dependent**  
2 **Notch signaling in endothelial cells to promote tumor angiogenesis and growth**

3  
4  
5  
6  
7

8 Shreoshi Sengupta<sup>1</sup>, Mainak Mondal<sup>1</sup>, Kaval Reddy Prasasvi<sup>1</sup>, Arani Mukherjee<sup>1</sup>, Prerna  
9 Magod<sup>2</sup>, Serge Urbach<sup>4</sup>, Dinorah Friedmann-Morvinski<sup>2,3\*</sup>, Philippe Marin<sup>4\*</sup> and Kumaravel  
10 Somasundaram<sup>1\*</sup>

11 <sup>1</sup>Department of Microbiology and Cell Biology, Indian Institute of Science, Bangalore 560012,  
12 India; <sup>2</sup>School of Neurobiology, Biochemistry and Biophysics, The George S. Wise Faculty of  
13 Life Sciences, Tel Aviv University, Tel Aviv 69978, Israel; <sup>3</sup>Sagol School of Neuroscience, Tel  
14 Aviv University, Tel Aviv 69978, Israel, <sup>4</sup>Institut de Génomique Fonctionnelle, Université de  
15 Montpellier, CNRS, INSERM, Montpellier, France

16  
17

18 \* Corresponding authors

19 Tel: +91-80-23607171

20 Fax: +91-80-23602697

21 Email: KS: skumar1@iisc.ac.in; ksomasundaram1@gmail.com;

22 PM: philippe.marin@igf.cnrs.fr; DFM: dino@tauex.tau.ac.il

23

24 **Running title:** Differentiated cancer cell-derived FMOD promotes tumor growth

25 **Conflict of Interest:** The authors declare no potential conflicts of interest.

26 **Keywords:** Cancer stem-like cells, Differentiated bulk tumor cells, Glioma stem-like cells,  
27 Differentiated glioma cells, Fibromodulin, Angiogenesis, Glioblastoma

28 **Abbreviations:** FMOD, Fibromodulin; CSC, Cancer stem-like cell; GSC, Glioma stem-like cell;  
29 DGC, Differentiated glioma cell; GBM, Glioblastoma; CM, Conditioned medium; GSI,  $\gamma$ -  
30 secretase inhibitor, TDEC, Tumor derived endothelial cells; VM, Vascular mimicry

31

32 **Abstract**

33 **Cancer stem cells alone can initiate and maintain tumors, but the function of non-cancer**  
34 **stem cells that form the tumor bulk remains poorly understood. Proteomic analysis showed**  
35 **a higher abundance of the extracellular matrix small leucine-rich proteoglycan**  
36 **Fibromodulin (FMOD) in the conditioned medium of non-cancer stem cells (DGCs;**  
37 **differentiated glioma cells) of glioma compared to that of glioma stem-like cells (GSCs).**  
38 **DGCs silenced for FMOD fail to cooperate with co-implanted GSCs to promote tumor**  
39 **growth. FMOD downregulation neither affects GSC growth and differentiation nor DGC**  
40 **growth and reprogramming *in vitro*. DGC-secreted FMOD promotes angiogenesis by**  
41 **activating Integrin-dependent Notch signaling in endothelial cells. Furthermore, conditional**  
42 **silencing of FMOD in newly generated DGCs *in vivo* inhibits the growth of GSC-initiated**  
43 **tumors due to poorly developed vasculature and increases mouse survival. Collectively, these**  
44 **findings demonstrate that DGC-secreted FMOD promotes glioma tumor angiogenesis and**  
45 **growth through paracrine signaling in endothelial cells and identifies a DGC-produced**  
46 **protein as a potential therapeutic target in glioma.**

47  
48  
49  
50  
51  
52  
53  
54  
55  
56  
57  
58  
59  
60  
61  
62

## 63 **Introduction**

64 Tumors and their microenvironment form an ecosystem with many cell types that support  
65 tumor growth. The key constituents of this ecosystem include cancer stem-like cells (CSCs), non-  
66 cancer stem cells (non-CSCs) or differentiated cancer cells, and various other cell types that  
67 collectively make up the tumor stroma (*Prager et al., 2019*). It is well established that the tumor-  
68 initiating capacity lies solely with CSCs, thereby making them the crucial architects of tumor-  
69 stroma interactions that favor tumor growth and progression (*Rheinbay et al., 2013*). CSCs have  
70 a dichotomous division pattern, as they are capable of self-renewal and give rise to differentiated  
71 cells that form the bulk of the tumor (*Olmeda and Ben Amar, 2019*). The indispensable role of  
72 CSCs, which usually constitute only a minority population within tumors, is well documented in  
73 many solid tumors (*Galli et al., 2004; Ignatova et al., 2002; Singh et al., 2004; Yang et al.,*  
74 *2020a*).

75 The tumor microenvironment is a vital driver of plasticity and heterogeneity in cancer  
76 (*Carnero and Leonart, 2016; Heddleston et al., 2010*). The presence of hypoxic and necrotic  
77 regions is the hallmark of very aggressive tumors like glioblastoma (GBM), which have a highly  
78 vascular niche that supplies nutrients to cancer cells and makes a conducive environment for the  
79 tumor cells to thrive (*Hambardzumyan and Bergers, 2015; Huang et al., 2016*). Paracrine  
80 signaling mediated by proteins secreted from tumor cells, particularly glioma stem-like cells  
81 (GSCs), helps acquire this highly vascular phenotype by attracting blood vessels towards  
82 themselves and inducing pro-angiogenic signaling in endothelial cells through extracellular matrix  
83 remodeling (*Dittmer and Leyh, 2014; Rupp et al., 2016*). A reciprocal relationship exists between  
84 GSCs and endothelial cells by which endothelial cells induce stemness phenotype in cancer cells  
85 through activation of Notch, Sonic-Hedgehog, and Nitric Oxide Synthase signaling pathways  
86 (*Jeon et al., 2014; Zhu et al., 2011*), while GSCs drive vascularization of the tumor via  
87 endogenous endothelial cell stimulation, vascular mimicry, and GBM-endothelial cell  
88 transdifferentiation (*Hardee and Zagzag, 2012; Soda et al., 2011*). Recent reports have shown  
89 that CSCs induce such a high vascularization of tumors such as GBM by migrating along blood  
90 vessel scaffolds to invade novel vascular niches, thereby ensuring surplus and continuous blood  
91 supply at their disposal (*Prager et al., 2020*). In GBM, CD133+ and Nestin+ cells (representing  
92 GSCs) are located in close proximity of the tumor microvascular density (MVD), whereas a lower  
93 number of CD133- and Nestin- cells (representing differentiated glioma cells; DGCs) are located

94 in the vicinity of the blood vessels. It has also been reported that the depletion of brain tumor blood  
95 vessels causes a decrease in the number of tumor-initiating GSCs (*Calabrese et al., 2007*).

96 Besides CSC self-renewal, their differentiation to form the bulk cancer cells also plays a  
97 crucial role in tumor growth and maintenance (*Jin et al., 2017*). Epigenome unique to CSCs  
98 compared to differentiated cancer cells has been documented (*Suva et al., 2014; Zhou et al., 2018*).  
99 Reciprocally, a set of four reprogramming transcription factors, POU3F2, SOX2, SALL2, and  
100 OLIG2, is identified in GBM that are sufficient to reprogram DGCs and create the epigenetic  
101 landscape of native GSCs, thus creating “induced” cancer stem cells (*Suva et al., 2014*). The  
102 epigenetic regulation forms the basis of cellular plasticity, which creates a dynamic equilibrium  
103 between CSCs and differentiated cancer cells (*Safa et al., 2015*). Oncogene-induced  
104 dedifferentiation of mature cells in the brain was also reported using a mouse model of glioma,  
105 and the reprogrammed CSCs were proposed to contribute to the heterogeneous cell state  
106 populations observed in malignant gliomas (*Friedmann-Morvinski et al., 2012; Friedmann-*  
107 *Morvinski and Verma, 2014*). Lineage tracing analyses revealed the reprogramming of DGCs to  
108 GSCs that act as a reservoir for initiating relapse of the tumors upon Temozolomide chemotherapy  
109 (*Auffinger et al., 2014*). Hypoxia has also been reported to reprogram differentiated cells to form  
110 CSCs in glioma, hepatoma, and lung cancer (*Prasad et al., 2017; Wang et al., 2017*). Spontaneous  
111 conversion of differentiated cancer cells to CSCs has also been reported in breast cancer  
112 (*Klevebring et al., 2014*).

113 Collectively, these studies highlight the crucial role of CSCs in cellular cross-talk in the  
114 tumor niche and establish CSCs as critical drivers of tumorigenesis. However, the massive  
115 imbalance in the proportions of CSCs and non-CSCs or differentiated cancer cells in tumors raises  
116 several important questions. Considering that differentiated cancer cells constitute the bulk of  
117 tumors, do they have specific functions, or do they only constitute the tumor mass? Do they  
118 contribute to the complex paracrine signaling occurring within the tumor microenvironment? Do  
119 they support tumor growth by promoting CSC growth and maintenance? It has been recently  
120 shown in GBM that DGCs cooperate with GSCs through a paracrine feedback loop involving  
121 neurotrophin signaling to promote tumor growth (*Wang et al., 2018*). While this study suggests a  
122 supporting role for differentiated cancer cells in tumor growth, the large proportion of them in  
123 tumors suggests a role in paracrine interactions with other stromal cells in the tumor niche.

124 We used quantitative proteomics to identify DGC-secreted proteins that might support their  
125 paracrine interactions within the tumor microenvironment. We show an essential role of  
126 Fibromodulin (FMOD) secreted by DGCs in promoting tumor angiogenesis via a cross-talk with  
127 endothelial cells. FMOD promotes Integrin-dependent Notch signaling in endothelial cells to  
128 enhance their migratory and blood vessel forming capacity. These findings indicate that DGCs are  
129 crucial for supporting tumor growth in the complex tumor microenvironment by promoting multi-  
130 faceted interactions between tumor cells and the stroma.

131

## 132 **Results**

### 133 **DGC and GSC secretomes have distinct proteomes revealed by tandem mass spectrometry**

134 While GSCs alone can initiate a tumor, the overall tumor growth requires functional  
135 interactions between GSCs and DGCs (*Singh et al., 2004; Wang et al., 2018*). To further  
136 understand the respective roles of GSCs vs. DGCs in tumor growth, we compared the conditioned  
137 medium (CM) derived from three patient-derived human GSC cell lines (MGG4, MGG6, and  
138 MGG8) (*Wakimoto et al., 2009*) and their corresponding DGCs, using a quantitative proteomic  
139 strategy. Proteins in CMs were systematically analyzed by nano-flow liquid chromatography  
140 coupled to Fourier transform tandem mass spectrometry (nano-LC-FT-MS/MS), and their relative  
141 abundance in DGC vs. GSC CM was determined by label-free quantification. We found that 119  
142 proteins are more abundant in GSC CM, while 185 proteins are more abundant in the DGC CM  
143 ( $p < 0.05$ , **Figure 1A; Supplementary Table S1**). Analysis of overrepresented functional  
144 categories among proteins exhibiting differential abundances in GSC vs. DGC CMs using Perseus  
145 with a  $p < 0.05$  revealed that the DGC CM is enriched in proteins known to exhibit  
146 extracellular or cell surface localization, such as proteins annotated as extracellular matrix (ECM)  
147 organization while terms related to DNA replication and many signaling pathways are enriched in  
148 GSC CM (**Supplementary Figures 1A and B**).

### 149 **TGF $\beta$ signaling controls the expression of Fibromodulin (FMOD) in DGCs**

150 The enrichment of the “extracellular matrix” (ECM) annotation among proteins exhibiting  
151 higher abundance in DGC secretome prompted us to focus on ECM proteoglycans in line with  
152 their critical role in facilitating cancer cell signaling through their interaction with growth factor  
153 receptors, extracellular ligands and matrix components, and in promoting tumor-  
154 microenvironment interactions (*Winkler et al., 2020*). Six ECM proteoglycans were found to be

155 more abundant in DGC CM compared with GSC CM (**Figure 1B**). The role of five of them  
156 (LAMB2, SERPINEE1, ITGB1, TNC, and LAMA5) in tumor growth has been well established  
157 (*Angel et al., 2020; Bartolini et al., 2016; Long et al., 2016; Wang et al., 2021; Yang et al.,*  
158 *2020b*). We thus focused on FMOD that exhibited the highest DGC CM/GSC CM protein ratio.  
159 FMOD is a small leucine-rich repeat proteoglycan upregulated in GBM due to the loss of promoter  
160 methylation orchestrated by TGF $\beta$ 1-dependent epigenetic regulation (*Mondal et al., 2017*).  
161 FMOD promotes glioma cell migration through actin cytoskeleton remodeling mediated by an  
162 Integrin-FAK-Src-Rho-ROCK signaling pathway but does not affect colony-forming ability,  
163 growth on soft agar, chemosensitivity, and glioma cell proliferation (*Mondal et al., 2017*). We first  
164 confirmed the higher abundance of FMOD seen in DGC CM compared to GSC CM (**Figure 1C**)  
165 both at the transcript level (**Figure 1D**) and at the protein level (**Figures 1E and F**) in three GSC  
166 cell lines (MGG4, MGG6, and MGG8).

167 In line with our previous findings indicating that TGF $\beta$  signaling controls FMOD  
168 expression in glioma (*Mondal et al., 2017*), we next explored the possible role of this pathway in  
169 FMOD overexpression in DGCs. Gene Set Enrichment Analysis (GSEA) analysis of differentially  
170 regulated transcripts in GSC vs. DGC showed significant depletion of several TGF $\beta$  signaling  
171 pathway genes (**Supplementary Figure 2; Supplementary Table S2**), suggesting an enhanced  
172 TGF $\beta$  signaling in DGCs. Likewise, GSEA revealed an enrichment of several TGF $\beta$  signaling  
173 pathway genes in most GBM transcriptome datasets (**Supplementary Figure 3**), further  
174 supporting activation of TGF $\beta$  signaling in DGCs that represent the bulk of GBMs. In addition,  
175 the DGCs used in this study that express a high level of FMOD showed enrichment in  
176 mesenchymal signature, compared to GSCs (**Supplementary Figure 4**), consistent with the  
177 elevated TGF $\beta$  signaling and FMOD levels we observed in the mesenchymal GBM subtype  
178 (**Supplementary Figures 5A and B**). Moreover, treating MGG8-DGCs with the TGF $\beta$  inhibitor  
179 (SB431542) significantly decreased luciferase activity of SBE–Luc (a TGF $\beta$  responsive reporter  
180 and contains Smad binding elements) and FMOD Promoter-Luc reporters (**Supplementary**  
181 **Figures 5C and D**). We also found higher levels of FMOD and TGM2 (a bona fide TGF $\beta$  target  
182 gene) transcripts and FMOD and pSMAD2 (an indicator of activated TGF $\beta$  signaling) proteins in  
183 MGG8-DGCs than MGG8-GSCs (**Figures 1G to 1I**). The addition of a TGF $\beta$  inhibitor  
184 (SB431542) significantly decreased transcript levels of FMOD and TGM2, and protein levels of  
185 FMOD and pSMAD2 in MGG8-DGCs (**Figures 1G to 1I**). Further, chromatin



186 immunoprecipitation experiments revealed pSMAD2 occupancy on FMOD promoter in MGG8  
187 DGCs that was significantly reduced by pretreating cells with SB431542 (**Figure 1J**). These  
188 results demonstrate a predominant expression and secretion of FMOD by DGCs that are promoted  
189 by TGF $\beta$  signaling.

### 190 **Tumor growth requires FMOD secreted by DGCs**

191 We next investigated the role of FMOD in GSC and DGC growth and interconversion  
192 between both cell populations *in vitro* using two human (MGG8 and U251) and two murine  
193 (AGR53 and DBT-Luc) glioma cell lines. We found that the absence of FMOD neither affected  
194 GSC growth and differentiation to DGC (**Supplementary Figures 6 to 8**) nor DGC growth and  
195 reprogramming to form GSCs (**Supplementary Figures 9 to 11**; more details in **Supplementary**  
196 **information**), consistent with our previous findings showing that FMOD does not affect glioma  
197 cell proliferation *in vitro* (*Mondal et al., 2017*). In line with previous findings that DGCs cooperate  
198 with GSCs to promote tumor growth (*Wang et al., 2018*), we then evaluated the ability of DGCs  
199 silenced for FMOD to support the growth of tumors initiated by GSCs in co-implantation  
200 experiments in a syngeneic mouse model using GSCs and DGCs derived from DBT-Luc glioma  
201 cells. Reminiscent of our observations in MGG8 cell line, DBT-Luc-DGCs express higher levels  
202 of FMOD than DBT-Luc-GSCs (**Supplementary Figures 10C and D**). To silence the expression  
203 of FMOD in DBT-Luc-DGCs, we used a doxycycline-inducible construct that contains an  
204 inducible mCherry-shRNA downstream of the Tet-responsive element (*Angel et al., 2020*) (**Figure**  
205 **2A**). The scheme of the co-implantation experiment is described on **Figure 2B**. DBT-Luc-GSC  
206 cells were coinjected with either DBT-Luc-DGC/miRNT (non-targeting shRNA) or DBT-Luc-  
207 DGC/miRFMOD (FMOD shRNA). In both groups, 50% of the mice received doxycycline on  
208 alternated days from day nine post-injection until the end of the experiment. Tumors in mice  
209 coinjected with DBT-Luc-GSCs and DBT-Luc-DGCs/miRNT grew much faster and reached a  
210 significantly larger size (measured by bioluminescence) than tumors in mice injected with DBT-  
211 Luc-GSCs alone, regardless of doxycycline treatment (**Figures 2B to 2D, compare black and**  
212 **purple lines with blue line; Supplementary Table S3**). Notably, mice treated with doxycycline  
213 did show mCherry expression in tumors (**Figure 2C**). In contrast, injected DBT-Luc-  
214 DGC/miRFMOD cells failed to support the growth of tumors initiated by DBT-Luc-GSCs in  
215 doxycycline-treated mice compared to doxycycline untreated mice (**Figures 2B to 2D; compare**  
216 **red line with orange line; Supplementary Table S3**). While mice injected with DBT-Luc-GSCs

217 + DBT-Luc-DGCs/miRFMOD (Dox+) showed an increase in tumor growth until the onset of  
218 doxycycline treatment (as seen in the rise in bioluminescence), subsequent tumor growth was  
219 drastically reduced. As expected, mice injected with DBT-Luc-DGCs alone developed  
220 substantially small tumors (**Figures 2C and D**). The small tumors formed in animals injected with  
221 either DBT-Luc-GSC + DBT-Luc-DGC/miRFMOD (Dox+) or DBT-Luc-GSC alone expressed  
222 significantly less FMOD protein than other tumors (**Supplementary Figure 12**). These results  
223 indicate that FMOD secreted by DGCs is essential for the growth of tumors initiated by GSCs.

#### 224 **FMOD induces angiogenesis of host-derived and tumor-derived endothelial cells**

225 Tumor cell interactions with stromal cells are critical for glioma tumor growth (*Pine et al.,*  
226 **2020**). Small leucine-rich proteoglycans such as FMOD promote angiogenesis in the context of  
227 cutaneous wound healing (*Pang et al., 2019*). In addition, we previously found a significant  
228 enrichment of the term “Angiogenesis” among differentially regulated genes in FMOD-silenced  
229 U251 glioma cells (*Mondal et al., 2017*). In light of these observations, we next examined the  
230 impact of FMOD on tumor angiogenesis. First, we tested the ability of glioma cell-derived FMOD  
231 to induce angiogenic network formation by immortalized human pulmonary microvascular  
232 endothelial cells (ST1). We used LN229 and U251 glioma cells, which express low and high levels  
233 of FMOD, respectively, for overexpression and silencing studies (*Mondal et al., 2017*). We found  
234 that the CM derived from LN229 cells stably expressing FMOD (LN229/FMOD) induced more  
235 angiogenesis than LN229/Vector stable cells (**Figures 3A and B**). Further, the CM of FMOD-  
236 silenced U251 cells was less efficient in promoting angiogenesis than the CM of cells expressing  
237 non-targeting siRNA (**Figure 3C; Supplementary Figure 13A**) or shRNA (**Supplementary**  
238 **Figure 13B**). The addition of recombinant human FMOD (rhFMOD) to the CM of U251/siFMOD  
239 cells rescued its ability to induce angiogenesis (**Figure 3C; Supplementary Figure 13A**). More  
240 importantly, the addition of rhFMOD directly to endothelial cells induced angiogenesis in the  
241 presence of a control antibody (IgG) but not in the presence of an FMOD neutralizing antibody  
242 (**Supplementary Figure 13C**).

243 Both CMs derived from three DGCs and their corresponding GSCs also induced  
244 angiogenesis efficiently (**Supplementary Figure 13D**). Further, pretreating cells with an FMOD  
245 antibody significantly reduced the ability of MGG8-DGC CM, but not that of MGG8-GSC CM,  
246 to induce angiogenesis (**Figure 3D**). The reduced ability of the FMOD antibody-pretreated DGC  
247 CM to promote angiogenesis was rescued by the exogenous addition of an excess of rhFMOD



248 **(Figure 3D)**. Moreover, CM derived from FMod-silenced MGG8-DGCs was less efficient in  
249 promoting angiogenesis than the CM of shNT **(Figure 3D)** or siNT **(Supplementary Figure 13E)**  
250 transfected MGG-DGC cells. The effect of FMod silencing was rescued by adding exogenous  
251 rhFMod **(Figure 3D; Supplementary Figure 13E)**. Both rhFMod and FMod present in the  
252 CM collected from MGG8-DGC induced the migration and invasion but not the proliferation of  
253 ST1 cells **(Supplementary Figures 14A to 14E)**. Further, CM from MGG8-DGC/shNT cells was  
254 more efficient than CM from MGG8-DGC/shFMod cells to promote angiogenic network  
255 formation by human brain-derived primary endothelial cells (HBMECs) and mouse brain-derived  
256 immortalized endothelial cells (B.End3) **(Figures 3E and F; Supplementary Figure 14F)**. Again,  
257 the effect of FMod silencing was rescued by adding rhFMod **(Figures 3 E and F;**  
258 **Supplementary Figure 14F)**.

259 Vascular mimicry (VM) is one of the alternative mechanisms of angiogenesis wherein  
260 tumor-derived endothelial cells (TDECs) originate from glioblastoma cells **(Angara et al., 2017;**  
261 **Ricci-Vitiani et al., 2010; Soda et al., 2011)**. To assess the ability of FMod to induce TDECs  
262 derived from DGCs to form angiogenic networks, we used MGG8-DGC and U87 cells. MGG8-  
263 DGC/shNT cells grown in endothelial media (M199) under hypoxia (1% O<sub>2</sub>) differentiated to  
264 TDECs as evidenced by an increase in CD31 **(Figures 3 G and H)**. MGG8-DGC/shFMod also  
265 differentiated to form TDECs, albeit with less efficiency **(Figures 3G and H)**. Further, the addition  
266 of rhFMod induced both MGG8-DGC/shNT-TDEC and MGG8-DGC/shFMod-TDEC cells to  
267 form angiogenic networks efficiently **(Figures 3 I and J)**. Similarly, U87 cells differentiated to  
268 TDECs **(Supplementary Figures 15A and B)**, which readily formed angiogenic networks in the  
269 presence of rhFMod **(Supplementary Figures 15 C and D)**. Collectively, these results  
270 demonstrate that DGC CM can induce angiogenesis and identify FMod as a critical mediator of  
271 DGC-induced angiogenesis.

### 272 **FMod activates Integrin/FAK/Src-dependent Notch pathway in endothelial cells to induce** 273 **angiogenesis**

274 To dissect the signaling mechanisms underlying FMod-induced angiogenesis, we  
275 subjected protein extracts derived from ST1 endothelial cells treated or not with rhFMod to  
276 Reverse Phase Protein Array (RPPA). A total of 12 proteins exhibited differential abundance in a  
277 time-dependent manner in rhFMod-treated ST1 endothelial cells **(Figure 4A)**. These include  
278 HES1, a downstream target of the Notch signaling pathway that has been shown to promote

279 angiogenesis (*Zhao et al., 2017*). We thus investigated the possible involvement of Notch  
280 signaling in FMOD-induced angiogenesis. The addition of rhFMOD induced luciferase activity of  
281 Notch-dependent CSL-Luc and HES-Luc reporters in ST1 cells, but not in  $\gamma$ -secretase inhibitor-  
282 (GSI; a Notch pathway inhibitor) pretreated cells (**Supplementary Figures 16A and B**). The  
283 addition of rhFMOD also increased HES1 mRNA and protein levels in ST1 cells, an effect  
284 abolished by GSI pretreatment of cells (**Figures 4B and C**). rhFMOD treatment also resulted in  
285 the translocation of NICD (Notch intracellular domain) from the cytosol to the nucleus, as shown  
286 by subcellular fractionation and confocal microscopy (**Supplementary Figures 16C and D**).  
287 Furthermore, rhFMOD failed to induce angiogenic network formation by GSI-pretreated ST1 cells  
288 (**Figure 4D**). In addition, ST1 cells having a stable expression of NICD (ST1/NICD) showed  
289 enhanced angiogenic network formation than ST1 vector stable (ST1/Vector) cells  
290 (**Supplementary Figures 17A to 17D**). FMOD present in CM from MGG8-DGCs induced  
291 ST1/Vector cells, but not ST1/NICD cells to form more angiogenic networks, suggesting that  
292 Notch activation in endothelial cells is an essential step in FMOD-induced angiogenesis.

293         The increase in phosphorylated FAK (pFAK, FAK<sub>Py397-R-V</sub>; the molecule downstream  
294 of Integrin signaling) levels in rhFMOD-treated endothelial cells, as shown by RPPA (**Figure 4A**),  
295 also suggested a possible role of integrin signaling in FMOD-induced angiogenesis. This is  
296 consistent with our previous findings indicating that FMOD activates Integrin signaling *via* type I  
297 collagen to engage the FAK-Src-Rho-ROCK pathway and promote the migration of glioma cells  
298 (*Mondal et al., 2017*). We first confirmed the activation of Integrin signaling by FMOD, as  
299 assessed by increased pFAK in rhFMOD-treated ST1 cells, but not in cells pretreated with RGD  
300 peptide, an Integrin inhibitor (**Figure 4E**). The addition of RGD peptide inhibited angiogenesis  
301 induced by LN229/FMOD CM (**Figure 4F**). Likewise, angiogenesis induced by LN229/FMOD  
302 CM was completely inhibited when ST1 cells were pretreated with inhibitors of FAK (FAKi) or  
303 Src (PP2), two signaling molecules downstream of Integrin (**Figure 4F**). These treatments also  
304 strongly reduced the basal level of angiogenesis elicited by the CM of LN229/Vector cells. In  
305 contrast, an inactive analog of Src inhibitor (PP3), as well as inhibitors of RAC1 and ROCK, failed  
306 to inhibit the ability of CM derived from LN229/FMOD cells to induce angiogenesis (**Figure 4F**).  
307 Our previous report also demonstrated that the interaction of FMOD with type I collagen is  
308 essential for integrin activation (*Mondal et al., 2017*). The C-terminal region of FMOD comprises  
309 11 leucine-rich-repeats (LRRs), of which the 11<sup>th</sup> repeat binds to type I collagen (*Oldberg et al.,*

310 **2007**). A synthetic interfering peptide (**RLDGNEIKR**) corresponding to the 11<sup>th</sup> LRR of type I  
311 collagen, but not a modified peptide (**RLDGNQIMR**), competes with rhFMOD for binding to type  
312 I collagen to activate integrin signaling in glioma cells (*Mondal et al., 2017; Oldberg et al., 2007*).  
313 Consistent with these findings, rhFMOD-induced luciferase activity of CSL-Luc and HES-Luc  
314 (**Supplementary Figures 18A and B**) and angiogenesis by ST1 cells (**Supplementary Figure**  
315 **18C**) were significantly inhibited by the interfering peptide, but not the modified peptide,  
316 suggesting a crucial role of type I collagen-dependent activation of Integrin signaling in FMOD-  
317 induced angiogenesis. To identify the  $\alpha$  and  $\beta$  subunits of integrin involved in FMOD-mediated  
318 activation of integrin signaling in endothelial cells, we chose ITGA6, ITGB1, and ITGAV for  
319 investigation based on analysis of transcriptome data derived from laser capture dissected  
320 microvessels from the human brain (more detail in **Supplementary information**). Silencing either  
321 of the selected three integrin subunits in ST1 cells reduced significantly the ability of rhFMOD to  
322 activate integrin as assessed by reduced pFAK levels (**Supplementary Figures 18B to 18I**), thus  
323 demonstrating the involvement of  $\alpha v/\beta 1$  and  $\alpha 6/\beta 1$  heterodimeric integrin receptors in FMOD  
324 activation of integrin signaling in endothelial cells.

325 Next, to examine a possible cross-talk between Integrin and Notch signaling in FMOD-  
326 treated endothelial cells, we tested the effect of the RGD peptide on the ability of rhFMOD to  
327 induce Notch signaling. Pretreatment of ST1 cells with RGD peptide significantly reduced  
328 rhFMOD-elicited CSL-Luc and HES-Luc activation (**Supplementary Figures 4E and F**).  
329 Likewise, pretreatment of cells with FAKi or PP2, but not PP3, significantly reduced rhFMOD-  
330 induced CSL-Luc and HES-Luc activity in ST1 cells (**Supplementary Figures 19A to 19D**).  
331 Further, rhFMOD failed to increase HES1 transcript and protein levels in ST1 cells treated with  
332 either RGD peptide, FAKi, or PP2, but not in cells treated with PP3 (**Figures 4G and H;**  
333 **Supplementary Figures 19E to 19H**).

334 We next investigated the mechanistic link between Integrin and Notch signaling in FMOD-  
335 treated ST1 cells. Since Notch activation by FMOD is sensitive to GSI treatment, we explored  
336 activation of Notch ligands by Integrin-FAK signaling in FMOD-treated cells. While the addition  
337 of rhFMOD induced DLL3 and JAG1 transcripts in ST1 cells, RGD peptide pretreatment  
338 abolished JAG1 induction (**Supplementary Figure 20A**), suggesting that JAG1 might be a  
339 potential linking molecule. Consistently, pretreatment of cells with either FAKi or PP2, but not  
340 PP3, also abolished the ability of rhFMOD to induce JAG1 transcript in ST1 cells (**Supplementary**

341 **Figures 20B and C).** Further, JAG1 silencing significantly decreased rhFMOD-induced activity  
342 of CSL-Luc and HES-Luc reporters and HES1 transcript/protein levels in ST1 cells  
343 (**Supplementary Figures 20D and E; Figures 4I to 4K**). JAG1 silencing also abolished the  
344 ability of rhFMOD to induce angiogenic networks by ST1 cells (**Figure 4L**). In addition, rhFMOD  
345 induced expression of the FAK inducible transcription factor KLF8 mRNA in ST1 cells, an effect  
346 abolished by pretreating cells with RGD peptide (**Supplementary Figure 20F**). Further, KLF8  
347 silencing in ST1 cells significantly reduced the ability of rhFMOD to increase pFAK level  
348 (**Supplementary Figures 20G and H**), suggesting that KLF8 activates JAG1 through an integrin-  
349 dependent pathway in FMOD-treated endothelial cells. Collectively, these results identify JAG1  
350 as a molecular link between Integrin and Notch signaling pathways in FMOD-treated endothelial  
351 cells and demonstrate a key role of Integrin-FAK-JAG1-Notch-HES1 signaling in FMOD-induced  
352 angiogenesis.

353 To further explore the clinical relevance of these findings, we interrogated transcriptome  
354 datasets from multiple sources (more detail in **Supplementary Information**). We found a  
355 significant upregulation of transcript levels of FMOD, JAG1 and HES1 in GBM from various  
356 datasets (**Supplementary Figures 21A to 21C**). We also found a positive correlation between  
357 FMOD and HES1 transcripts and between FMOD and JAG1 transcripts in the majority of GBM  
358 datasets analyzed (**Supplementary Figures 21D and E**), which further substantiates the  
359 functional link between FMOD, JAG1, and HES1. We also show that high FMOD transcript levels  
360 and hypomethylation of FMOD promoter are associated with poor prognosis in most datasets  
361 (**Supplementary Figures 22F and G**). These observations provide additional support for the  
362 activation of Integrin-Notch signaling in FMOD-treated endothelial cells.

### 363 **DGC-secreted FMOD is required for the growth of murine and human GSC-initiated tumors**

364 While GSCs alone can initiate a tumor, tumor growth requires continuous differentiation  
365 to form DGCs, which form the bulk of the tumor mass. In line with our co-implantation  
366 experiments (**Figure 2**), we sought to define the importance of FMOD secreted by DGCs generated  
367 through a differentiation program initiated by GSCs during tumor growth *in vivo*, using a syngenic  
368 intracranial glioma mouse model. We injected AGR53-GSC-miRNT and AGR53-GSC-  
369 miRFMOD cells intracranially into C57/black mice and allowed them to form tumors. Thirteen  
370 days after intracranial injections, both groups received doxycycline as indicated (**Figure 5A**). The  
371 understanding is that as the tumors start growing, GSCs, in addition to their self-renewal, will start

372 differentiating *de novo* to form DGCs, which would express high levels of FMOD. However,  
373 doxycycline treatment would inhibit FMOD expression, and thus one could investigate the  
374 importance of DGC-secreted FMOD in tumor growth. AGR53-GSC/miRNT and AGR53-  
375 GSC/miRFMOD cell-initiated tumors showed a similar size seven days after doxycycline  
376 treatment as shown by mCherry fluorescence (**Figures 5B and C; day 21**). However, upon  
377 subsequent follow-up, doxycycline administration significantly inhibited the growth of AGR53-  
378 GSC/miRFMOD-initiated tumors over time but not that of AGR53-GSC/miRNT tumors (**Figures**  
379 **5B, C, and E**). Further, doxycycline administration increased the survival of mice injected with  
380 AGR53-GSC/miRFMOD cells compared to AGR53-GSC/miRNT cells (**Figure 5D**). AGR53-  
381 GSC/miRFMOD initiated tumors showed decreased FMOD, mCherry, and GFP expression  
382 compared to AGR53-GSC/miRNT initiated tumors (**Figures 5F and G**). DBT-Luc  
383 GSC/miRFMOD, another murine glioma GSC cell line, produced similar results: FMOD silencing  
384 after doxycycline administration resulted in reduced tumor growth (**Supplementary Figures 23A**  
385 **and B**), increased mice survival (**Supplementary Figures 23C**), and decreased FMOD expression  
386 (**Supplementary Figure 23D**).

387 To determine the relevance of our findings for the human pathology, we investigated the  
388 importance of DGC-secreted FMOD in the growth of tumors initiated by MGG8 and U251 cells  
389 using a xenograft mouse glioma model. The enrichment of cancer stem cells in MGG8 GSC  
390 neurospheres was confirmed by the higher expression of CD133, compared to MGG8 DGCs  
391 (**Figure 6A**). We established orthotopic xenografts using MGG8-GSC/shNT and MGG8-  
392 GSC/shFMOD cells. Reminiscent of results obtained using transplantation of murine glioma cells,  
393 MGG8-GSC/shNT-transplanted mice readily developed intracranial tumors, whereas MGG8-  
394 GSC/shFMOD mice showed impaired tumor formation and increased mice survival (**Figures 6B,**  
395 **and C**). Immunostaining and confocal microscopy analysis showed high expression of FMOD in  
396 MGG8-GSC/shNT while FMOD was barely detectable in MGG8-GSC/shFMOD tumors (**Figure**  
397 **6D**). Likewise, U251/shFMOD cells that showed reduced FMOD protein level compared to  
398 U251/shNT (**Supplementary Figure 11A**), developed smaller tumors (**Figures 6E to 6H**), and  
399 mice bearing U251/shFMOD tumors had longer survival than those carrying U251/shNT tumors  
400 (**Figure 6G**). As expected, the expression of FMOD was more elevated in U251/shNT tumors than  
401 in U251/shFMOD tumors (**Figure 6I**). Collectively, these findings indicate that DGC-secreted  
402 FMOD is essential for the growth of both human and mouse glioma.



### 403 **Reduced angiogenesis in small tumors formed in FMOD-silenced conditions**

404 Next, we investigated the mechanism underlying reduced tumor growth in FMOD-silenced  
405 conditions. First, we measured the expression of CD133 and GFAP markers as the representation  
406 of GSCs and DGCs in the tumors formed in the animal models. The CD133 positive cells are much  
407 less in proportion compared to GFAP positive cells in tumors formed by AGR53-GSC, DBT-Luc-  
408 GSCs, and MGG8-GSCs under FMOD non-targeting conditions (**Supplementary Figures 24A,**  
409 **and B, 25A and B, and 26A and B**), in good correlation to the low proportion of GSCs seen in  
410 brain tumors (**Singh et al., 2004, Galli et al., 2004, and Calabrese et al., 2007**). Further, most  
411 GFAP positive cells are also positive for FMOD expression compared to CD133 positive cells  
412 (**Supplementary Figures 24A and C, 25A and C, and 26A and C**), recapitulating the results we  
413 obtained *in vitro*, where FMOD is expressed specifically by DGCs (**Figure 1**). We also found a  
414 similar expression pattern of CD133 and GFAP markers in small tumors formed under FMOD-  
415 silenced conditions in all three tumor models (**Supplementary Figures 24D and E, 25D and E,**  
416 **and 26D and E**). The GFAP staining in these tumors confirms the occurrence of an efficient  
417 differentiation program even in FMOD-silenced conditions, which confirms our results obtained  
418 *in vitro*, where the absence of FMOD failed to affect the GSC differentiation to form DGCs  
419 (**Supplementary Figures 6 and 8**). As expected, the small tumors formed in FMOD-silenced  
420 conditions showed substantially reduced FMOD staining (**Supplementary Figures 24D and F,**  
421 **25D and F, and 26D and F**).

422 We next evaluated the extent of blood vessel formation by measuring the endothelial cell  
423 marker immunostaining in the tumors. The small size tumors formed by AGR53-GSC/miRFMOD  
424 cells after doxycycline treatment showed reduced staining for CD31 and vWF (von Willebrand  
425 factor) compared to AGR53-GSC/miRNT tumors (**Figures 7A to 7C, and Supplementary**  
426 **Figures 27A to 27C**). Tumors formed by DBT-Luc-GSC/miRFMOD cells in doxycycline-treated  
427 mice also showed significantly reduced CD31 staining compared to that measured in the absence  
428 of doxycycline treatment (**Supplementary Figures 27D to 27F**). Reminiscent of murine glioma  
429 tumors, tumors induced by MGG8-GSC/shFMOD cells also showed reduced CD31 staining  
430 compared to MGG8-GSC/shNT cells (**Figures 7D to 7F**). We then tested the extent of blood vessel  
431 formation by TDECs. In all three tumor models (AGR53-GSCs, DBT-Luc-GSCs, and MGG8-  
432 GSCs), blood vessels formed by TDECs were significantly reduced in tumors formed in FMOD-  
433 silenced conditions (**Figures 7G to 7L; Supplementary Figures 27G to 27I**). These findings



434 confirm our previous results obtained *in vitro*, where the absence of FMOD decreased the ability  
435 of host-derived endothelial cells and TDECs to form angiogenic networks (**Figure 3;**  
436 **Supplementary Figures 13 to 15**). Next, we investigated the involvement of Integrin-FAK-  
437 JAG1-Notch-HES1 signaling in FMOD-induced angiogenesis in the context of glioma tumors.  
438 Confocal microscopy analysis in tumors formed by MGG8-GSCs, AGR53-GSCs, and DBT-Luc-  
439 GSCs revealed a significant colocalization of the endothelial cell marker CD31 with FMOD,  
440 pFAK, JAG1, and HES1 in blood vessels (**Supplementary Figures 28A to 28C**). From these  
441 results, we conclude that angiogenesis induced by DGC-secreted FMOD is essential for glioma  
442 tumor growth.

443

## 444 **Discussion**

445 Cellular hierarchy is well established in GBM. The importance of GSCs in tumor initiation,  
446 growth, immune escape, angiogenesis, invasion into the normal brain and resistance to therapy is  
447 also well established (*Bao et al., 2006; Wakimoto et al., 2009*). GSCs are known for their ability  
448 to self-renew and to differentiate to form DGCs, the bulk cells of tumors (*Galli et al., 2004;*  
449 *Ignatova et al., 2002; Singh et al., 2004; Suva et al., 2014; Yang et al., 2020a*). However, the role  
450 of DGCs in tumor growth remains poorly understood. The key requirement of tumor cells for self-  
451 maintenance in a novel tumor niche is the supply of nutrients. GSCs are known to promote the  
452 establishment of a highly vascularized microenvironment by being in close physical contact with  
453 endothelial cells (*Calabrese et al., 2007*). The massive proportion of DGCs in the tumor suggests  
454 that GSC-initiated angiogenesis might not be sufficient to meet the large nutrient requirement of  
455 the entire tumor. Wang *et al.* demonstrated that DGC-secreted BDNF is essential for GSC growth  
456 and maintenance through DGC-GSC paracrine signaling, which highlights the crucial role of  
457 DGC- secreted proteins in tumor formation (*Wang et al., 2018*). Further, a possible interaction  
458 between DGCs and stromal cells, such as endothelial cells, cannot be ruled out. We hypothesized  
459 that in addition to GSCs, DGCs might play an essential role in autocrine and paracrine signaling  
460 involving different types of cells to augment tumor growth. The present study demonstrates the  
461 existence of paracrine signaling between DGCs and endothelial cells, which promotes  
462 angiogenesis and glioma tumor growth.

463 Previously, we have demonstrated that FMOD is highly expressed in GBMs compared to  
464 normal brain tissues. The loss of FMOD expression hampers the migratory function of glioma

465 cells but has no impact on glioma cell proliferation (*Mondal et al., 2017*). This study identifies  
466 that FMOD is expressed exclusively by DGCs and further showed that FMOD is not needed for  
467 GSC/DGC growth and their plasticity to form one from the other. Given these facts, the inability  
468 of DGCs silenced for FMOD to support the growth of tumors initiated by GSCs was unexpected.  
469 However, it enlightened us that DGC-secreted FMOD has some essential yet unidentified  
470 functions supporting GSC-initiated tumor growth.

471 Here, we explored the mechanisms underlying the role of DGCs acting as critical support  
472 for GSC-initiated tumor growth. We demonstrate that DGC-secreted FMOD promotes tumor  
473 growth by inducing angiogenesis through integrin-dependent Notch signaling in endothelial cells,  
474 thus highlighting the importance of DGCs in tumor-stroma interactions that contribute to a  
475 sustainable niche for tumor growth. We further investigated the mechanism by which FMOD  
476 activates integrin-dependent Notch signaling in endothelial cells. Based on RPPA data which  
477 showed upregulation of HES1 in endothelial cells upon FMOD treatment, we demonstrated that  
478 activation of Notch signaling is essential for FMOD-induced angiogenesis. The importance of  
479 Notch signaling in glioma, especially in GSC growth and angiogenesis, is well documented  
480 (*Bazzoni and Bentivegna, 2019; Stockhausen et al., 2010; Teodorczyk and Schmidt, 2014*).  
481 Similarly, activation of Notch signaling in endothelial cells has been involved in tumor  
482 development and angiogenesis (*Gridley, 2007; Kofler et al., 2011; Phng and Gerhardt, 2009*).  
483 RPPA data also showed an increase in pFAK in FMOD-treated glioma cells. Our previous study  
484 showed that FMOD acts on glioma cells via the Integrin-FAK-Src-Rho axis to promote migration  
485 (*Mondal et al., 2017*). The present study demonstrates that FMOD-activated Integrin signaling is  
486 essential for Notch pathway activation in ST1 cells. Integrin signaling in endothelial cells has been  
487 shown to play a crucial role in angiogenesis (*Short et al., 1998; Silva et al., 2008*). Based on our  
488 results indicating that FMOD-activated Notch signaling in endothelial cells is inhibited by GSI,  
489 we predicted that FMOD-elicited activation of the Notch pathway could involve Notch ligand-  
490 dependent process. Our experiments identified that JAG1 is the linker molecule that integrates  
491 Integrin signaling to the Notch pathway. We also found a significant colocalization of endothelial  
492 cell marker CD31 with FMOD, pFAK, JAG1, and HES1 in blood vessels of tumors formed in  
493 mouse models. Finally, endothelial cells stably expressing NICD showed enhanced angiogenic  
494 network formation in an FMOD-independent manner, suggesting that Notch activation is an  
495 essential step in FMOD-induced angiogenesis. Thus, our results show that Integrin-FAK-Src-

496 KLF8-JAG1-dependent Notch signaling activation in endothelial cells mediates FMOD-induced  
497 angiogenesis.

498 Finally, in an orthotopic intracranial GBM mouse model, we show that conditional  
499 silencing of FMOD in newly generated DGCs during tumor growth leads to a significant reduction  
500 of tumor growth. Supporting our *in vitro* data indicating that FMOD is not required for GSC  
501 growth and their differentiation, we found that the small tumors formed in FMOD-silenced  
502 conditions show differentiation of GSCs. However, these tumors exhibited poorly developed blood  
503 vasculatures of host-derived endothelial cells and TDECs. The lower tumor burden in the absence  
504 of FMOD might be attributed to insufficient nutrient supply to sustain tumor growth due to the  
505 reduced blood vessel density. Thus, our study establishes an essential role of paracrine signaling  
506 between the DGCs and the stroma in the context of tumor growth in the natural tumor niche  
507 complexity. It also demonstrates the importance of FMOD secreted by DGCs in promoting human  
508 glioma tumor growth in a mouse model. We propose a tumor evolution model (**Figure 7M**),  
509 whereby GSCs, in addition to their self-renewal, continuously differentiate to form DGCs, which  
510 secrete protein factors like FMOD that mediate paracrine signaling in the different cell types of  
511 the tumor, thus creating a niche favorable to tumor growth.

512 In conclusion, the present study demonstrates that in addition to GSCs, DGCs have an  
513 essential role in tumor growth and maintenance. While the therapy-resistant and self-renewing  
514 GSCs trigger the early events of transformation and growth, DGCs, the proportion of which  
515 continues to increase during tumor growth, progressively become essential. Thus, targeting both  
516 CSCs and differentiated cancer bulk cells is vital to achieving a durable therapeutic response. The  
517 study also highlights the potential of GSC and DGC CM analysis to uncover novel targets in cancer  
518 therapy and the critical influence of DGC-secreted FMOD in glioma tumor growth.

519

## 520 **Author Contributions**

521 SS carried out the experiments, MM carried out bioinformatic analyses, AM helped in some  
522 experiments related to cell culture, KRP and PM<sup>2</sup> helped in animal experiments, SU carried out  
523 mass spectrometry experiments, DFM and PM<sup>4</sup> corrected the manuscript and helped in planning  
524 experiments, KS wrote the manuscript and executed the whole study.

525

526

## 527 **Acknowledgments**

528 The results published here are in whole or part based upon data generated by The Cancer Genome  
529 Atlas pilot project established by the NCI and NHGRI. Information about TCGA and the  
530 investigators and institutions that constitute the TCGA research network can be found at  
531 <http://cancergenome.nih.gov/>. We acknowledge the shRNA consortium (Dr. Subba Rao), IISc,  
532 India, for shRNA constructs. SS acknowledges IISc for fellowship. KS acknowledges CEFIPRA  
533 DBT, DST, and CSIR (Govt. of India) for research grants. Infrastructure supported by DST FIST,  
534 DBT-IISc partnership program, and UGC is acknowledged. KS is awarded J. C. Bose Fellowship  
535 from DST. This research was supported in part by grants to DFM from the Israel Science  
536 Foundation (Grant no.1315/15 and 1429/20). PM was supported by grants from Fondation pour la  
537 Recherche Médicale and CEFIPRA (n° IFC/5603-C/2016/503). Mass spectrometry experiments  
538 were carried out using the facilities of the Montpellier Proteomics Platform (PPM, BioCampus  
539 Montpellier).

540

## 541 **Declaration of Interest**

542 The authors declare no competing interests.

543

## 544 **Figure legends**

545 **Figure 1: Quantitative proteomics shows higher abundance of fibromodulin under the**  
546 **control of TGF $\beta$  signaling in the DGC secretome. A.** Volcano plot depicting relative protein  
547 abundance in GSC (MGG4, MGG6 and MGG8) vs. their corresponding DGC conditioned media  
548 (CMs). The black dots represent the non-significant proteins ( $p > 0.05$ ), while the red (higher  
549 abundance in GSC CM) and green (lower abundance in GSC CM) dots represent the significant  
550 ones ( $p < 0.05$ ) with a Log<sub>2</sub> fold change cut-off of  $> 0.58$  or  $< -0.58$ . **B.** Venn diagram showing  
551 proteins upregulated in DGC CM and those annotated as ECM proteoglycans. Of the common  
552 proteins, FMOD exhibits the highest DGC/GSC ratio (indicated by the more intense red color). **C.**  
553 Label-free quantification (LFQ) of FMOD, expressed as Log<sub>2</sub> fold change in GSCs vs. DGCs CM.  
554 **D.** Real-time qRT-PCR analysis shows upregulation of FMOD transcript in DGCs (red bars) vs.  
555 GSCs (blue bars). **E.** Western blotting shows the presence of higher amounts of intracellular  
556 FMOD in DGCs compared with corresponding GSCs. **F.** Top: Western blotting shows the  
557 presence of higher amounts of FMOD in the DGC CM vs. GSC CM. Bottom: Equal loading of the

558 proteins assessed by Ponceau Red staining. **G.** Real-time qRT-PCR analysis showing showing  
559 reduction of high FMOD transcript level in DGCs upon treatment SB431542 (10  $\mu$ M), a TGF- $\beta$   
560 inhibitor. Red bars indicate FMOD expression, and blue bars represent TGM2 (a bonafide TGF-  
561  $\beta$  pathway target gene) expression. **H.** Western blotting shows that the high FMOD level in DGCs  
562 is inhibited by treating cells with SB431542 (10  $\mu$ M); intracellular-top, and secreted-bottom. Equal  
563 loading of the secreted proteins assessed by Ponceau Red staining (bottom). **I.** Western blotting  
564 shows higher expression of pSMAD2 in DGCs than in GSCs, which is reduced by SB431542  
565 treatment. **J.** Real-time qRT-PCR shows significantly higher fold enrichment of pSMAD2 in the  
566 FMOD promoter, which is inhibited upon SB431542 treatment (10  $\mu$ M). for panels C, D, G, and  
567 J, p-value is calculated by unpaired t test with Welch's correction. p value less than 0.05 is  
568 considered significant with \*, \*\*, \*\*\* representing p value less than 0.05, 0.01 and 0.001  
569 respectively.

570 **Figure 2: DGC-secreted FMOD is essential for tumor growth initiated by GSCs *in vivo* in a**  
571 **co-implantation experiment.**

572 **A.** Inducible shFMOD lentiviral construct. **B.** Schema depicting the GSC-DGC co-implantation  
573 experiment in C57BL/6 mice (n=5 for each group). Mice were injected with a combination of  
574 DBT-Luc-GSCs + DBT-Luc-DGCs (two groups for miRNT, Dox+ and Dox-. Same strategy for  
575 miRFMOD group.) The control groups were only injected with  $10^5$  DBT-Luc-GSCs or  $10^6$  DBT-  
576 Luc-DGCs and did not receive doxycycline. **C.** *In vivo* imaging of the injected mice, showing  
577 tumor growth over time by both bioluminescence and mCherry fluorescence, according to the  
578 timeline shown in **B.** **D.** Quantification of the total radiance. The different colors represent the  
579 different groups of animals. Significant differences between each of the groups were calculated  
580 using ANOVA. The p-values for days 28 and 32 are shown. A detailed comparison of the p values  
581 between different groups is provided in Supplementary Table 2.

582 **Figure 3: DGC-secreted FMOD promotes angiogenesis.** **A.** Representative images of *in vitro*  
583 network formation by ST1 cells treated with LN229/Vector CM vs. LN229/FMOD CM. In the  
584 positive control condition (top left), cells are plated in complete endothelial cell media (Medium  
585 199) supplemented with Endothelial Cell Growth Factors (ECGS) and 20% FBS, and in the  
586 negative control (top right), where cells are plated in incomplete Medium 199 (without serum and  
587 ECGS). Significantly more networks are formed when ST1 cells are treated with LN229/FMOD  
588 CM (right bottom), compared with cells treated with LN229/Vector CM (left bottom).

589 Magnification 10X, Scale bar = 100  $\mu$ m. **B.** Quantification of the number of complete networks  
590 formed in **A.** **C.** Quantification of the number of networks formed by ST1 cells shows that cells  
591 treated with U251-DGC/siFMOD (low FMOD) CM form a significantly lesser number of  
592 networks than cells treated with U251-DGC/siNT (high FMOD) CM. This reduction in the number  
593 of networks is rescued by addition of rhFMOD (400 nM) in U251-DGC/siFMOD CM. **D.**  
594 Quantification of the number of networks formed in the *in vitro* angiogenesis assay showing that  
595 DGC-secreted FMOD induces network formation by ST1 cells, which is reduced when an FMOD-  
596 neutralizing antibody is added to the CM and rescued by adding rhFMOD. Furthermore, MGG8-  
597 DGC/shFMOD CM forms lesser networks than MGG8-DGC/shNT CM, which is rescued by  
598 adding rhFMOD to the MGG8-DGC/shFMOD CM. **E.** Representative images of *in vitro* network  
599 formation by primary human brain-derived microvascular endothelial cells (HBMECs).  
600 Significant reduction in the number of networks formed when the cells are treated with MGG8-  
601 DGC/shFMOD CM compared with MGG8-DGC/shNT CM, which is rescued by the exogenous  
602 addition of rhFMOD. Magnification 4X, Scale bar = 200  $\mu$ m. **F.** Quantification of the number of  
603 complete networks formed in **E.** **G.** Real-time qRT-PCR analysis showing CD31 (blue bars) and  
604 FMOD (orange bars) expression in ST1, MGG8-DGC/shNT and MGG8-DGC/shFMOD cells  
605 before and after transdifferentiation (the groups labeled as TDECs represent the transdifferentiated  
606 cells). **H.** Western blotting analysis showing the expression of FMOD and CD31 in MGG8-  
607 DGC/shNT and MGG8-DGC/shFMOD cells before and after transdifferentiation (the groups  
608 labeled as TDECs represent the transdifferentiated cells). **I.** Representative images of *in vitro*  
609 network formation by MGG8-DGC/shNT TDECs and MGG8-DGC/shFMOD TDECs upon BSA  
610 and rhFMOD treatments. Magnification 4X, Scale bar = 200  $\mu$ m. **J.** Quantification of the number  
611 of complete networks formed in **I.** For panels B, C, D, F, G, and J, p-values were calculated by  
612 unpaired t-test with Welch's correction. p values < 0.05 were considered significant with \*, \*\*,  
613 \*\*\* representing p values < 0.05, 0.01 and 0.001 respectively. ns stands for non-significant.

614 **Figure 4: Integrin/FAK/Src/JAG1-dependent Notch pathway activation in endothelial cells**  
615 **mediates FMOD-induced angiogenesis** **A.** Heatmap showing differentially regulated proteins in  
616 endothelial cells (treated with vehicle or 400 nM rhFMOD for 10, 30 and 60 min, Log<sub>2</sub> fold change  
617 >/< 0.2), assessed by RPPA (Reverse Phase Protein Array). Red and green depict upregulated and  
618 downregulated proteins in ST1 cells, respectively. The red arrows indicate HES1 and pFAK. **B.**  
619 qRT-PCR analysis shows that rhFMOD treatment of ST1 cells causes a time-dependent increase



620 in HES1 mRNA, which is inhibited in cells pre-treated with GSI (10  $\mu$ M). **C.** Western blotting  
621 showing rhFMOD treatment of ST1 cells causes an increase in HES1 protein, which is inhibited  
622 in cells pre-treated with GSI. **D.** Quantification of the number of networks formed in *in vitro*  
623 angiogenesis assay shows that the rhFMOD-mediated increase in the number of networks formed  
624 by ST1 cells is abolished in cells pre-treated with GSI. **E.** Western blotting shows a time-dependent  
625 increase in phospho-FAK level in FMOD-treated ST1 cells. This increase is suppressed when the  
626 cells are pre-treated with RGD peptide (10  $\mu$ M), an Integrin inhibitor. **F.** Quantification of  
627 networks upon treatment of ST1 cells with either LN229/Vector CM or LN229/FMOD CM. ST1  
628 cells are pretreated with the indicated inhibitors (PP2, PP3, and FAK inhibitor- PF573228 were  
629 used at a concentration of 10  $\mu$ M, ROCK1 inhibitor-H1152 was used at a concentration of 0.5  $\mu$ M,  
630 Rac1 inhibitor was used at a concentration of 10  $\mu$ M). **G.** qRT-PCR analysis shows that rhFMOD  
631 treatment of ST1 cells causes a time-dependent increase in HES1 mRNA, which is inhibited in  
632 cells are pre-treated with RGD peptide. **H.** Western blotting showing rhFMOD treatment of ST1  
633 cells causes an increase in HES1 protein level, which is inhibited in cells pre-treated with the RGD  
634 peptide. **I.** Western blotting validating the knockdown of JAG1 in shJAG1-transfected ST1 cells.  
635 **J.** qRT-PCR analysis shows that rhFMOD-induced expression of HES1 mRNA is significantly  
636 decreased in ST1/shJAG1 cells compared with ST1/shNT cells. **K.** rhFMOD-induced expression  
637 of HES1 protein is decreased in ST1/shJAG1 cells compared with ST1/shNT cells. **L.**  
638 Quantification of networks formed in *in vitro* angiogenesis assay upon treatment of ST1/shNT and  
639 ST1/shJAG1 cells with BSA or rhFMOD. For panels B, D, F, G, J, and L, the p-value calculated  
640 by unpaired t-test with Welch's correction are indicated. p-value less than 0.05 was considered  
641 significant with \*, \*\*, \*\*\* representing p-value less than 0.05, 0.01 and 0.001 respectively.

642 **Figure 5. Conditional silencing of FMOD in DGCs formed *de novo* by GSC-initiated tumors**  
643 **inhibits tumor growth.** **A.** Schema is showing the timeline of the *in vivo* experiments. AGR53-  
644 GSCs (stably expressing miRNT or miRFMOD) were injected (1 x 10<sup>5</sup> cells per animal) on Day  
645 0. Tumors were allowed to grow till day 13, and then doxycycline (100  $\mu$ g/animal) administration  
646 was started. Please note, *in vitro* characterization show that the highest knockdown of FMOD was  
647 obtained on the 7<sup>th</sup> day after doxycycline administration. First, *in vivo* imaging for mCherry  
648 expression depicting tumor size was done on day 21 post-injection, followed by imaging at regular  
649 intervals (as noted by the orange marks). **B.** *In vivo* fluorescence imaging of mice injected with  
650 either AGR53-GSC/miRNT or AGR53-GSC/miRFMOD cells. **C.** Radiance Efficiency for each

651 time point in the two groups of animals was plotted as a measure of tumor size at the indicated  
652 days. **D.** Kaplan-Meier graphs showing the survival of mice bearing AGR53-GSC/miRNT (Dox+)  
653 and AGR53-GSC/miRFMOD (Dox+) cells. **E.** Haematoxylin and Eosin staining show a larger  
654 tumor (depicted by dark blue color due to extremely high cell density) in mice brain injected with  
655 AGR53-GSC/miRNT (Dox+) cells (top), compared to that of AGR53-GSC/miRFMOD (Dox+)  
656 cells (bottom). Magnification=0.8 X **F.** Immunohistochemical analysis showing FMOD  
657 expression in brains of mice injected with AGR53-GSC/miRNT (Dox+) and AGR53-  
658 GSC/miRFMOD (Dox+) cells. Red indicates FMOD, and Blue indicates H33342. The merged  
659 images have been shown for representation. Magnification = 20x, Scale= 50  $\mu$ m **G.** Brain sections  
660 showing areas of fluorescence for both AGR53-GSC/miRNT (Dox+) (left panel) and AGR53-  
661 GSC/miRFMOD (Dox+) (right panel) groups of animals. Please note that AGR53 cell lines stably  
662 express GFP. mCherry expression is induced upon doxycycline addition. On day 13, prior to the  
663 administration of doxycycline, both miRNT(left) and miRFMOD (right) do not have any mCherry  
664 expression but have almost equal GFP expression. However, over time after the onset of  
665 doxycycline administration, both mCherry and GFP expression decreased in miRFMOD group but  
666 not in the miRNT group. Merged images show an overlap of GFP and mCherry-positive tumor  
667 areas. Magnification=20x, Scale= 50 $\mu$ m . For panels C and D, p-value less than 0.05 was considered  
668 significant with \*, \*\*, \*\*\* representing p-value less than 0.05, 0.01, and 0.001, respectively.

669 **Figure 6: Growth of human GSC-initiated tumors require secreted FMOD** **A.** Flow-  
670 cytometry analysis showing enrichment of CD133-positive cells in MGG8-GSCs compared to  
671 MGG8-DGCs. **B.** Kaplan-Meier graphs showing the survival of mice injected with MGG8-  
672 GSC/shNT or MGG8-GSC/shFMOD cells. **C.** Haematoxylin and Eosin staining showing tumors  
673 in brains of mice injected with MGG8-GSC/shNT and MGG8-GSC/shFMOD cells.  
674 Magnification= 0.8 X **D.** Immunohistochemical labeling showing FMOD expression in brains of  
675 mice injected with MGG8-GSC/shNT or MGG8-GSC/shFMOD cells. Red indicates FMOD, and  
676 Blue indicates H33342. The merged images have been shown for representation. Magnification =  
677 20x, Scale, 50  $\mu$ m. **E.** *In vivo* bioluminescence imaging of two groups of animals injected with  
678 either U251/shNT or U251/shFMOD cells. The tumor formation was followed over 26 days. **F.**  
679 Total radiance for each time point was plotted as an index of tumor size for both animal groups.  
680 **G.** Kaplan-Meier graphs showing the survival of mice injected with U251-DGC/shNT or U251-  
681 DGC/shFMOD cells. **H.** Haematoxylin and Eosin staining showing tumors in brains of mice

682 injected with U251-DGC/shNT or U251-DGC/shFMOD cells. Scale= 0.8 X. **I.**  
683 Immunohistochemical analysis showing FMOD expression in brains of mice injected with U251-  
684 DGC/shNT or U251-DGC/shFMOD cells. Red indicates FMOD, and Blue indicates H33342. The  
685 merged images have been shown for representation. Magnification = 20x, Scale = 50  $\mu$ m. For  
686 panels B, F, and G, a p-value less than 0.05 was considered significant with \*, \*\*, \*\*\* representing  
687 p values less than 0.05, 0.01, and 0.001, respectively. ns stands for non-significant.

688 **Figure 7: Reduced angiogenesis is characteristic of tumors initiated by FMOD-silenced**  
689 **glioma cells. A.** Immunohistochemical analysis showing blood vessels lined by cells expressing  
690 CD31 in brains of mice injected with AGR53-GSC/miRNT or AGR53-GSC/miRFMOD cells after  
691 doxycycline administration. **B.** Quantification of the mean fluorescence intensity of CD31 in  
692 brains of mice injected with AGR53-GSC/miRNT or AGR53-GSC/miRFMOD cells after  
693 doxycycline administration. **C.** Quantification of the mean area of blood vessels in brains of mice  
694 injected with AGR53-GSC/miRNT or AGR53-GSC/miRFMOD cells after doxycycline  
695 administration. **D.** Immunohistochemical analysis showing CD31 expression in brains of mice  
696 injected with MGG8-GSC/shNT or MGG8-GSC/shFMOD. **E.** Quantification of the mean  
697 fluorescence intensity of CD31 in brains of mice injected with MGG8-GSC/shNT or MGG8-  
698 GSC/shFMOD cells. **F.** Quantification of the mean, mean area of blood vessels in brains of mice  
699 injected with MGG8-GSC/shNT or MGG8-GSC/shFMOD cells. **G.** Immunohistochemical  
700 analysis showing overlap of CD31 (red) and GFP (green) expression in brains of mice injected  
701 with AGR53-GSC/miRNT or AGR53-GSC/miRFMOD cells after doxycycline administration.  
702 The yellow arrow indicates the region exhibiting colocalization of both markers. **H.** Quantification  
703 of the colocalization coefficient in the AGR53-GSC/miRNT and AGR53-GSC/miRFMOD groups  
704 of animals after doxycycline injection. **I.** Quantification of the TDEC<sup>+</sup> blood vessels, indicating  
705 the measure of vascular mimicry (VM) in the AGR53-GSC/miRNT and AGR53-GSC/miRFMOD  
706 groups. **J.** Immunohistochemical analysis showing overlap of CD31 (red) and GFAP (green)  
707 expression in brains of mice injected with MGG8-GSC/shNT or MGG8-GSC/shFMOD cells. The  
708 yellow arrow indicates the region exhibiting colocalization of both markers **K.** Quantification of  
709 the colocalization coefficient in the MGG8-GSC/shNT and MGG8-GSC/shFMOD groups. **L.**  
710 Quantification of the TDEC<sup>+</sup> blood vessels, indicating the measure of vascular mimicry (VM) in  
711 the MGG8-GSC/shNT and MGG8-GSC/shFMOD groups. **M.** A model depicting how GBM  
712 tumors are made up of a small proportion of GSCs, and a massive number of DGCs that form the

713 tumor bulk. FMOD, primarily secreted by DGCs, upregulates JAG1 through the activation of  
714 integrin signaling in ST1 cells. The higher expression of JAG1 causes the activation of the Notch  
715 signaling pathway, which results in the transcriptional upregulation of HES1 in endothelial cells.  
716 The integrin-dependent Notch pathway activation promotes angiogenesis and vascular mimicry,  
717 leading to glioma tumor growth. For panels A, D, G, and J, the magnification used is 20 X (Scale  
718 = 50  $\mu$ m). For panels B, C, E, F, H, I, K, and L, a p-value less than 0.05 was considered significant  
719 with \*, \*\*, \*\*\* representing a p-value less than 0.05, 0.01, and 0.001, respectively.

720

## 721 **MATERIALS AND METHODS**

### 722 **RESOURCE AVAILABILITY**

723 Further information and requests for resources and reagents should be directed to and will be  
724 fulfilled by the lead contact Dr. Kumaravel Somasundaram (skumar1@iisc.ac.in).

### 725 **MATERIALS AVAILABILITY**

726 This study did not generate any new unique reagents.

### 727 **DATA AND AVAILABILITY**

728 Label-free mass spectrometry data between the GSC and DGC showing protein ratios in the GSC  
729 and DGC secretome and p values are shown on Supplementary Table S1 for proteins exhibiting  
730 significant differences in abundance in both conditions. The mass spectrometry data obtained the  
731 current study are available from the corresponding author on request.

### 732 **EXPERIMENTAL MODEL AND SUBJECT DETAILS**

733 Experiments were performed in C57&BL/6J female mice and Athymic Nude female mice (6-8  
734 week old) following the approved by the Institute Ethical Committee for Animal Experimentation.  
735 The mice were kept in a 12h light and dark cycle, fed *ad libitum* with a normal diet and the  
736 experiments were done in the light phase of the cycle.

#### 737 **Cell lines used:**

738 The GBM adherent cell lines LN229 and U251 were purchased from Sigma Aldrich, Saint Louis,  
739 Missouri, USA. Primary human tumour-derived GSCs MGG4, MGG6, and MGG8 were kindly  
740 gifted by Dr. Wakimoto (Massachusetts General Hospital, Boston, USA). AGR53 mouse-derived  
741 cell line is described before (*Angel et al., 2020*). DBT-Luc cells were a kind gift from Dr. Dinesh  
742 Thotala, Washington University in St. Louis St Louis, Missouri, United States. ST1 endothelial  
743 cells were a kind gift from Dr. Ron Unger, Johannes Gutenberg University, Germany. B.End3 cell

744 line purchased from The American Type Culture Collection (ATCC, #CRL-2299). The HBMECs  
745 were purchased from Cell Biologics, USA (#H-6023).

#### 746 **Plasmids:**

747 The RAR3G vector (in which miRNT and miRFMOD are cloned for the inducible shRNA  
748 experiments) is previously described (*Friedmann-Morvinski et al., 2012*). shRNA for FMOD  
749 (miRFMOD) was cloned following the mir30 (miRNT) inducible backbone under the TRE  
750 (Tetracycline response element) promoter which is placed downstream of mCherry reporter gene.  
751 The m2RtTA transactivator is expressed from the same vector in the opposite direction under the  
752 EF1 $\alpha$  promoter, and following a 2A peptide, the puromycin gene is placed for selection *in vitro*.  
753 The FMOD overexpression plasmid was bought from Origene, USA (#LY419579). NICD pCMV  
754 Neo/intracellular domain of human Notch1 (NIC-1) and CSL Luc were kind gifts from Prof.  
755 Thomas Kandesch, Department of Genetics, University of Pennsylvania School of Medicine. Hes-  
756 Luc plasmid was bought from Addgene, USA (#43806).

#### 757 **Antibodies used:**

758 **Primary antibodies:** FMOD (Abgent AP9243b, 1:2000), FAK (Cell Signaling Technology  
759 3285S, 1:1000), pFAK (Cell Signaling Technology #3283S, 1:500), GAPDH (Sigma #G8795,  
760 1:20,000), Actin (Sigma A3854, 1:20,000), HES1 (Cell Signaling Technology #D6P2U, 11988S,  
761 1:1000), vWF (Abcam #6994, 1:2000), CD31 (Cell Signaling Technology #89C2, Mouse mAb  
762 1:200 for IHC), JAG1 (Cell Signaling Technology, Jagged1 (D4Y1R) XP<sup>®</sup> Rabbit mAb #70109,  
763 1:200 for IHC, 1:1000 for WB), FMOD (Fibromodulin Polyclonal Antibody PA5-26250,  
764 Invitrogen, IHC 1:100, WB 1:1000), CD133 (Recombinant Anti-CD133 antibody-EPR20980-104  
765 #ab216323 abcam, Flow Cyt. 1:100, Prom1 Monoclonal Antibody-2F8C5, #MA1-219, IHC  
766 1:100), SOX2 (Cell Signaling Technology #3579 Rabbit mAb, IHC 1:100), GFAP ( Anti-GFAP  
767 antibody ab7260, abcam ICC 1:200, Recombinant Anti-GFAP antibody [EPR1034Y] - Mouse  
768 IgG2a (ab279290), IHC 1:200), NICD (NOTCH1 (Cleaved Val1744) Polyclonal Antibody PA5-  
769 99448, WB 1:200), SMAD2 (Smad2 (D43B4) XP<sup>®</sup> Rabbit mAb #5339, Wb 1:1000), pSMAD2  
770 (Phospho-SMAD2 (Ser465/Ser467) (E8F3R) Rabbit mAb #18338, WB 1:1000), Integrin beta-1  
771 (Cell Signaling Technology #9699 Rabbit mAb, WB 1:1000), Integrin alphaV (Cell Signaling  
772 Technology #4711 Rabbit Ab, WB 1:1000), Integrin alpha-6 (Recombinant Anti-Integrin alpha 6  
773 antibody [EPR18124] (ab181551), WB 1:500), KLF8 (Anti-KLF8 antibody (ab168527), WB  
774 1:500)



775 **Secondary antibodies:** Goat Anti mouse HRP conjugate (Biorad #170-5047, WB 1:5000), Goat  
 776 anti rabbit (H+L) secondary HRP conjugate (Invitrogen, #31460, WB 1:5000), Goat anti-Mouse  
 777 IgG (H+L) Highly Cross-Adsorbed Secondary Antibody, Alexa Fluor 488) (Invitrogen, #A-  
 778 11029), Goat anti-Rabbit IgG (H+L) Highly Cross-Adsorbed Secondary Antibody, Alexa Fluor  
 779 488 (Invitrogen, # Catalog # A-11034), Goat anti-Mouse IgG (H+L) Highly Cross-Adsorbed  
 780 Secondary Antibody, Alexa Fluor 594 (Invitrogen, # Catalog # A-11032), Goat anti-Rabbit IgG  
 781 (H+L) Highly Cross-Adsorbed Secondary Antibody, Alexa Fluor 594 (Invitrogen, # Catalog # A-  
 782 11037), Goat anti-Rabbit IgG (H+L) Highly Cross-Adsorbed Secondary Antibody, Alexa Fluor  
 783 405 Plus (Invitrogen, # A48254), Goat anti-Mouse IgG (H+L) Highly Cross-Adsorbed Secondary  
 784 Antibody, Alexa Fluor 405 Plus (Invitrogen, # Catalog # A48255). All Alexafluor conjugated  
 785 antibodies were used at a dilution of 1:500 for IHC and ICC.

786 **Resource Table**

| <b>REAGENT or RESOURCE</b>                                                                    | <b>SOURCE</b>                | <b>IDENTIFIER</b>                                |
|-----------------------------------------------------------------------------------------------|------------------------------|--------------------------------------------------|
| <b>Antibodies</b>                                                                             |                              |                                                  |
| Rabbit polyclonal anti-FMOD                                                                   | Abgent                       | Cat# AP9243b<br>RRID:AB_10612142                 |
| Rabbit polyclonal anti-FAK                                                                    | Cell Signaling<br>Technology | Cat#T9026; RRID:<br>AB_477593<br>RRID:AB_2269034 |
| Rabbit polyclonal anti-phospho FAK (Tyr397)                                                   | Cell Signaling<br>Technology | Cat# 3283,<br>RRID:AB_2173659                    |
| Mouse Anti-GAPDH Monoclonal Antibody,<br>Unconjugated, Clone GAPDH-71.1                       | Sigma-Aldrich                | Cat# G8795,<br>RRID:AB_1078991                   |
| Mouse Anti-Actin, beta Monoclonal Antibody,<br>Horseradish Peroxidase Conjugated, Clone AC-15 | Sigma-Aldrich                | Cat# A3854,<br>RRID:AB_262011                    |
| Rabbit Monoclonal HES1 (D6P2U) antibody                                                       | Cell Signaling<br>Technology | Cat# 11988,<br>RRID:AB_2728766                   |
| Rabbit polyclonal Von Willebrand Factor antibody                                              | Abcam                        | Cat# ab6994,<br>RRID:AB_305689                   |
| Mouse monoclonal CD31 antibody                                                                | Cell Signaling<br>Technology | Cat#89C2<br>RRID:AB_2160882                      |
| JAG1 Rabbit monoclonal antibody                                                               | Cell Signaling<br>Technology | Cat#70109<br>RRID: AB_2799774                    |
| FMOD Rabbit polyclonal antibody                                                               | Invitrogen                   | Cat#PA5-26250<br>RRID: AB_2543750                |



|                                                                                              |                              |                                                   |
|----------------------------------------------------------------------------------------------|------------------------------|---------------------------------------------------|
| CD133 Recombinant antibody                                                                   | Abcam                        | Cat#ab216323 RRID:<br><a href="#">AB_2847920</a>  |
| Prom1 Monoclonal antibody                                                                    | Invitrogen                   | Cat#MA1-219<br>RRID: <a href="#">AB_2725113</a>   |
| SOX2 Rabbit monoclonal antibody                                                              | Cell Signaling<br>Technology | Cat#3579<br>RRID: <a href="#">AB_2195767</a>      |
| GFAP Mouse antibody                                                                          | Abcam                        | Cat#ab279290<br>RRID: <a href="#">AB_1209224</a>  |
| GFAP Recombinant antibody                                                                    | Abcam                        | Cat#ab7260<br>RRID: <a href="#">AB_305808</a>     |
| NOTCH1 Polyclonal antibody                                                                   | Invitrogen                   | Cat#PA5-99448<br>RRID: <a href="#">AB_2818381</a> |
| SMAD2 Rabbit monoclonal antibody                                                             | Cell Signaling<br>Technology | Cat#5339<br>RRID: <a href="#">AB_10626777</a>     |
| pSMAD2 Rabbit monoclonal antibody                                                            | Cell Signaling<br>Technology | Cat#18338<br>RRID: <a href="#">AB_2798798</a>     |
| Integrin beta-1 Rabbit monoclonal antibody                                                   | Cell Signaling<br>Technology | Cat#9699<br>RRID: <a href="#">AB_11178800</a>     |
| Integrin alpha-V Rabbit monoclonal antibody                                                  | Cell Signaling<br>Technology | Cat#4711<br>RRID: <a href="#">AB_2128178</a>      |
| Integrin Alpha 6 antibody                                                                    | Abcam                        | Cat#ab181551<br>RRID:                             |
| KLF8 antibody                                                                                | Abcam                        | Cat#ab168527<br>RRID:                             |
| Goat Anti mouse HRP conjugate                                                                | Biorad                       | Cat#170-5047<br>RRID: <a href="#">AB_11125753</a> |
| Goat anti rabbit (H+L) secondary HRP conjugate                                               | Invitrogen                   | Cat#31460<br>RRID: <a href="#">AB_228341</a>      |
| Goat anti-Mouse IgG (H+L) Highly Cross-Adsorbed<br>Secondary Antibody, Alexa Fluor 488       | Invitrogen                   | Cat#A-11029<br>RRID: <a href="#">AB_138404</a>    |
| Goat anti-Rabbit IgG (H+L) Highly Cross-Adsorbed<br>Secondary Antibody, Alexa Fluor 488      | Invitrogen                   | Cat#A-11034<br>RRID: <a href="#">AB_2576217</a>   |
| Goat anti-Mouse IgG (H+L) Highly Cross-Adsorbed<br>Secondary Antibody, Alexa Fluor 594       | Invitrogen                   | Cat#A-11032<br>RRID: <a href="#">AB_2534091</a>   |
| Goat anti-Rabbit IgG (H+L) Highly Cross-Adsorbed<br>Secondary Antibody, Alexa Fluor 594      | Invitrogen                   | Cat#A-11037<br>RRID: <a href="#">AB_2534095</a>   |
| Goat anti-Rabbit IgG (H+L) Highly Cross-Adsorbed<br>Secondary Antibody, Alexa Fluor 405 Plus | Invitrogen                   | Cat#A48254<br>RRID: <a href="#">AB_2890548</a>    |
| Goat anti-Mouse IgG (H+L) Highly Cross-Adsorbed<br>Secondary Antibody, Alexa Fluor 405 Plus  | Invitrogen                   | Cat#A48255<br>RRID: <a href="#">AB_2890536</a>    |
| <b>Biological samples</b>                                                                    |                              |                                                   |
| Healthy adult C57BL/6 brain tissue                                                           | In this study                |                                                   |
| GBM adult C57BL/6 brain tissue                                                               | In this study                |                                                   |

|                                                                                                    |                                                                                                 |                                            |
|----------------------------------------------------------------------------------------------------|-------------------------------------------------------------------------------------------------|--------------------------------------------|
| Healthy adult nude mice brain tissue                                                               | In this study                                                                                   |                                            |
| GBM adult nude mice brain tissue                                                                   | In this study                                                                                   |                                            |
| GBM adult C57BL/6 subcutaneous tumor tissue                                                        | In this study                                                                                   |                                            |
| <b>Chemicals, peptides, and recombinant proteins</b>                                               |                                                                                                 |                                            |
| $\gamma$ -Secretase inhibitor (GSI)                                                                | Merck                                                                                           | 565750                                     |
| RGD peptide (Integrin inhibitor)                                                                   | Sigma-Aldrich                                                                                   | <b>A8052</b> CAS Number: <u>99896-85-2</u> |
| FAK inhibitor (PF-573228)                                                                          | Sigma-Aldrich                                                                                   | PZ0117 CAS Number: <u>869288-64-2</u>      |
| PP2 (Src inhibitor)                                                                                | Sigma-Aldrich                                                                                   | <b>P0042</b> ; CAS Number: 172889-27-9     |
| PP3 (negative control, structural analogue of PP2)                                                 | Sigma-Aldrich                                                                                   | 529574 CAS 5334-30-5                       |
| ROCK1 inhibitor                                                                                    | Sigma-Aldrich                                                                                   | 555550 CAS 871543-07-6                     |
| RAC1 inhibitor                                                                                     | Sigma-Aldrich                                                                                   | 553502 CAS 1177865-17-6                    |
| TGFB R1 inhibitor SB431542                                                                         | Sigma-Aldrich                                                                                   | 616464 CAS 301836-41-9                     |
| Fibromodulin (FMOD) (NM_002023) Human Recombinant Protein                                          | Origene                                                                                         | <b>CAT#: TP306534</b>                      |
| <b>Deposited data</b>                                                                              |                                                                                                 |                                            |
| Label-free mass spectrometry performed with conditioned media from MGG4, MGG6 and MGG8 GSC vs DGC. | This paper                                                                                      | Supplementary Table S1                     |
| <b>Experimental models: cell lines</b>                                                             |                                                                                                 |                                            |
| Human cell line: LN229                                                                             | Sigma Aldrich                                                                                   |                                            |
| Human cell line: U251-MG                                                                           | Sigma Aldrich                                                                                   | 09063001                                   |
| Human cell line: MGG4, MGG6, MGG8                                                                  | Gift from Dr. Wakimoto (Massachusetts General Hospital, Boston, USA).                           |                                            |
| Mouse Cell line: AGR-53                                                                            | Lab of Dr. Dinorah Friedmann-Morvinski, Tel Aviv University, Israel                             |                                            |
| Mouse Cell line: DBT-Luc                                                                           | Lab of Dr. Dinesh Thotala, Washington University in St. Louis St Louis, Missouri, United States |                                            |
| Human Cell line: ST1 (HPMECs)                                                                      | Lab of Dr. Ron Unger, Johannes Gutenberg University, Germany.                                   |                                            |
| Human brain-derived microvascular endothelial cells (HBMECs)                                       | Cell Biologics, USA                                                                             | #H-6023                                    |
| B.End3 Mouse brain-derived immortalized endothelial cells                                          | The American Type Culture Collection                                                            | #CRL-2299                                  |
| <b>Experimental models: organisms/strains</b>                                                      |                                                                                                 |                                            |

|                                                                            |                                                                                                                                                                                                                                       |                                                        |
|----------------------------------------------------------------------------|---------------------------------------------------------------------------------------------------------------------------------------------------------------------------------------------------------------------------------------|--------------------------------------------------------|
| Mouse: C57BL/6J, females, 6-8 weeks old                                    | The Jackson Laboratory                                                                                                                                                                                                                | JAX:000664                                             |
| Mouse: Athymic nude, Nude, 6-8 weeks old, females                          | The Jackson Laboratory                                                                                                                                                                                                                | JAX 002019                                             |
| <b>Oligonucleotides</b>                                                    |                                                                                                                                                                                                                                       |                                                        |
| All shRNA sequences used in the study are provided in the methods section. |                                                                                                                                                                                                                                       |                                                        |
| Primers for gene expression, detail given in the methods section           |                                                                                                                                                                                                                                       |                                                        |
| <b>Recombinant DNA</b>                                                     | Gene Tools                                                                                                                                                                                                                            |                                                        |
| Plasmid: RAR3G (TetOn)                                                     | Lab of Dr. Dinorah Friedmann-Morvinski                                                                                                                                                                                                |                                                        |
| Plasmid: FMOD overexpression construct in pcMV-entry backbone              | Origene                                                                                                                                                                                                                               | #LY419579                                              |
| Plasmid: CSL Luc                                                           | Lab of Prof. Thomas Kandesch, Department of Genetics, University of Pennsylvania School of Medicine.                                                                                                                                  |                                                        |
| Plasmid: pHes1(2.5k)-luc                                                   | Addgene                                                                                                                                                                                                                               | Cat # 43806                                            |
| NICD pCMV Neo/intracellular domain of human Notch1 (NIC-1)                 | Lab of Prof. Thomas Kandesch, Department of Genetics, University of Pennsylvania School of Medicine.                                                                                                                                  |                                                        |
| <b>Software and algorithms</b>                                             |                                                                                                                                                                                                                                       |                                                        |
| ImageJ                                                                     | Chen et al., 2013                                                                                                                                                                                                                     |                                                        |
| MaxQuant software package                                                  | Cox et al., 2008                                                                                                                                                                                                                      |                                                        |
| Zen Black from Zeiss                                                       | <a href="https://www.zeiss.com/microscopy/int/products/microscope-software/zen.html">https://www.zeiss.com/microscopy/int/products/microscope-software/zen.html</a>                                                                   |                                                        |
| <b>Other</b>                                                               |                                                                                                                                                                                                                                       |                                                        |
| Reverse Phase Protein Array (RPPA) analysis                                | <a href="https://www.mdanderson.org/research/research-resources/core-facilities/functional-proteomics-rppa-core.html">https://www.mdanderson.org/research/research-resources/core-facilities/functional-proteomics-rppa-core.html</a> | M.D. Anderson Cancer Center, University of Texas, USA. |

787

## 788 **Neurosphere culturing**

789           The GSCs are obtained by dissecting GBM tumor tissue and then treating with Trypsin,  
790 followed by Trypsin inhibitor. The chopped tissue is then passed through a cell strainer to remove  
791 the debris and the obtained filtrate is plated in ultra-low attachment plates using the stem cell for  
792 neurosphere formation media described in the following sentence. Then neurospheres were grown  
793 in Neurobasal medium (#21103049, Gibco) supplemented with 1X L-Glutamine (# 25030081,  
794 stock 200 mM i.e.,100X, Gibco), Heparin 2µg/ml (#H3393 Sigma), 1X B27 supplement

795 (#17504044, Gibco, stock concentration 50X), 0.5X N2 supplement (#17502048, Gibco, stock  
796 concentration 100X), 20ng/ml rhEGF (#g5021, Promega), 2ng/ml rhFGF-basic (#100-18B-100  
797 µg, Peprotech) and Penicillin and Streptomycin. To make single-cell suspensions for re-plating,  
798 the spheres are chemically dissociated after 7 days of plating, using NeuroCult™ Chemical  
799 Dissociation Kit (Mouse, #05707) from Stem Cell Technologies according to the manufacturer's  
800 instructions.

### 801 **Differentiation of GSCs to DGCs**

802 For differentiation of GSCs to DGCs, fully grown neurospheres were collected from the  
803 ultra-low attachment plates (Corning, USA) and plated on normal cell culture dishes in DMEM  
804 media supplemented with 10% FBS and antibiotics as mentioned earlier, for 15-20 days (*Suva et*  
805 *al., 2014*).

### 806 **Reprogramming of DGCs**

807 The differentiated counterparts of GSCs as well as differentiated GBM cell lines were  
808 removed from 10% FBS containing DMEM, spun down twice in PBS to remove any trace of FBS  
809 and plated on ultra-low attachment plates in Neurobasal medium containing all the supplements  
810 mentioned earlier and antibiotics for 7-10 days.

### 811 **Neurosphere assay**

812 Viral infection was done in the GSCs using lentivirus for non-targeting shRNA (shNT) or  
813 shRNA for the gene of interest. The small pellets of cells were collected 48 hours after viral  
814 infection, dissociated to form single cells that were counted and re-plated in 6-well plates (30,000  
815 cells/well) in complete Neurobasal medium. At the same time, cells were harvested and checked  
816 for specific gene manipulation (like knockdown verification). Media was replenished every 2-3  
817 days and sphere formation was monitored till the 6<sup>th</sup> or 7<sup>th</sup> day after re-plating. The number of  
818 spheres, sphere diameter and size were analyzed using Image J software. Spheres having area less  
819 than 50 µm<sup>2</sup> were excluded from the analysis.

### 820 **Limiting Dilution assay**

821 For each condition, 1, 10, 50, 100 and 200 GSCs (single cells) were plated in 10 wells each,  
822 respectively, of a 96-well plate and sphere formation was assessed over the next 5-7days. The  
823 number of wells not forming spheres were counted and plotted against the number of cells per  
824 well. Extreme Limiting Dilution Assay using the ELDA software available online  
825 (<https://www.elda.at/cdscontent/?contentid=10007.854970&portal=eldaportal>).

## 826 **CM collection, concentration and sample preparation for mass spectrometry**

827 GSC cell lines growing as neurospheres were grown in complete Neural Stem Cell medium  
828 containing Glutamine, Heparin, N2, B27, EGF and FGF for 6 days. They were thoroughly washed  
829 using PBS and re-plated without disrupting them in Neural Stem Cell medium devoid of  
830 supplements and growth factors. Thirty-six hours after plating in incomplete medium, the  
831 conditioned medium was collected, spun at 1,500 rpm for 15 min, filtered using 0.45 micron  
832 syringe filters and stored at -80°C. The DGCs were grown in complete DMEM supplemented with  
833 10% FBS, then washed with PBS and CM was collected after 36 hours in incomplete medium and  
834 similarly stored.

835 The conditioned media were concentrated using Centricons (3 kDa cut off; Merck) from 8  
836 ml to 100 µl, followed by precipitation of proteins with trichloroacetic acid (TCA 10% for 30 min  
837 at 4°C). Equal amounts of proteins from each condition were run on gradient (4-20 %) SDS gels  
838 and stained with Colloidal Coomassie blue. The gels were then destained and each lane cut into 5  
839 equal pieces. Proteins were digested in-gel using trypsin (Gold Promega, 1 µg per band, overnight  
840 at 30°C,) as previously described (*Thouvenot et al., 2008*).

## 841 **Mass Spectrometry, protein identification and relative quantification**

842 Trypsin peptides were analysed online by nano-flow liquid chromatography coupled to  
843 tandem-mass spectrometry using a Q-Exactive+ mass spectrometer (Thermo Fisher Scientific,  
844 Waltham USA) coupled to a RSLC-U3000 HPLC (Thermo Fisher Scientific). Desalting and pre-  
845 concentration of samples were performed on-line on a Pepmap<sup>®</sup> pre-column (0.3 mm × 10 mm,  
846 Dionex). A gradient consisting of 2–25% B for 80 min, 25-40 % B for 20 min and finally 40-90%  
847 B for 5 min (A = 0.1% formic acid; B = 0.1% formic acid in 80% acetonitrile) at 300 nL/min was  
848 used to elute peptides from the capillary reverse-phase column (0.075 mm × 150 mm, Acclaim  
849 Pepmap 100<sup>®</sup> C18, Thermo Fisher Scientific). Eluted peptides were electro-sprayed online at a  
850 voltage of 1.5 kV into the Q-Exactive+ mass spectrometer. A cycle of one full-scan mass spectrum  
851 (MS1, 375–1,500 m/z) at a resolution of 70,000, followed by 12 data-dependent tandem-mass  
852 (MS2) spectra was repeated continuously throughout the nano-LC separation. Parameters used for  
853 MS2 spectra were: resolution of 17,500, AGC target of 1e5, a normalized collision energy of 28  
854 and an isolation window of 1.2 m/z. Mass spectra were processed using the MaxQuant software  
855 package (v 1.5.5.1, *Cox and Mann, 2008*) against the UniProtKB Reference proteome  
856 UP000005640 database for Homo sapiens (release 2018\_11) and contaminant database. The

857 following parameters were used: enzyme specificity set as Trypsin/P with a maximum of two  
858 missed cleavages, Oxidation (M) and Acetyl (Protein N-term) set as variable modifications and  
859 carbamidomethyl (C) as fixed modification, and a mass tolerance of 0.5 Da for fragment ions. The  
860 maximum false peptide and protein discovery rate was specified as 0.01. Match between runs was  
861 used to transfer identification from run to run. Relative protein quantification was performed using  
862 LFQ intensity in MaxQuant. For statistical analysis, missing values were defined using the  
863 imputation tool of the Perseus software (v. 1.6.1.1, *Tyanova et al., 2016*).

#### 864 **Lentivirus preparation and transduction of cells**

865 HEK-293T cells were seeded in 60 mm or 90 mm Poly-L-Lysine coated cell culture dishes.  
866 The cells were transfected with shRNA plasmid and helper plasmids psPAX2 and pMD2.G using  
867 Opti-MEM (Invitrogen #22600-050) medium and lipofectamine  
868 (<https://www.thermofisher.com/order/catalog/product/12566014> Invitrogen), when the cells were  
869 60-70% confluent. Six hours after transfection, the Opti-MEM medium was replaced by fresh  
870 DMEM medium supplemented with 10% FBS. Sixty hours post-transfection, the supernatant from  
871 the transfected cells were collected in 15 ml falcon tubes, centrifuged at 5000 rpm for 10 min,  
872 filtered through 0.45  $\mu$ m, and stored in -80° C for future use.

873 For virus used in endothelial cells, DMEM was removed after 24 hours of transfection and  
874 changed to complete M199 and the virus was collected after sixty hours as mentioned previously.  
875 The same method was used for virus to be used for GSCs (DMEM was changed to NBM).The  
876 shRNA construct number TRCN0000152163 from Sigma human TRC shRNA library was used  
877 for knockdown studies of human FMOD. The shRNA construct number TRCN000094248 from  
878 Sigma mouse TRC shRNA library was used for knockdown studies of mouse FMOD. A pooled  
879 lentivirus using the construct numbers TRCN000024441, TRCN000024441, TRCN000024441,  
880 and TRCN000024420 were used for knock-down studies of JAG1 in the ST1 cells.

#### 881 **Endothelial cell culture**

882 ST1 cells were grown in Medium 199 (Sigma #M4530) supplemented with 20% FBS and  
883 ECGS (Sigma #E2759), Heparin, Glutamine (1X) and 1X Antibiotic-Antimycotic Solution  
884 (Sigma, # A5955, stock concentration 100X).



## 885 **Transdifferentiation of DGCs**

886 The MGG8-DGCs were grown in Medium 199 having the same composition as mentioned  
887 above, for three days and subjected to hypoxia (1% O<sub>2</sub>) for 8 hours. The cells then formed  
888 transdifferentiated endothelial cells (TDECs), showed endothelial morphology (data not shown),  
889 were harvested for checking markers levels, and were also plated for the *in vitro* angiogenesis  
890 assay.

## 891 **NICD stable generation**

892 For NICD stable cell-line generation, the ST1 cells were transfected with NICD pCMV  
893 Neo/intracellular domain of human Notch1 (NIC-1) plasmid using Lipofectamine 200  
894 (Invitrogen), and then were harvested 48 hours after transfection for western blot and *in vitro*  
895 angiogenesis assay.

## 896 **RNA isolation, cDNA conversion and Real-Time Quantitative RT-PCR analysis**

897 Total RNA from the cells was isolated from cells using the TRI reagent (#T9424 Sigma)  
898 according to the manufacturer's instructions. Next, the integrity of the RNA was checked by  
899 running it on 2% MOPS-formaldehyde gel. RNAs were quantified by Nanodrop. Two µg of total  
900 RNA were used for cDNA conversion using the High capacity cDNA reverse transcription kit  
901 (Applied Biosystems, USA) according to the manufacturer's protocol. The cDNAs were diluted  
902 in a ratio of 1:10 with nuclease-free water to make its final concentration 10 ng/µl. Subsequently,  
903 real-time quantitative PCR was done using the ABI Quant Studio 5 and 6 (Life technologies,  
904 USA). The cDNA was used as template and DyNAmo Flash SYBR Green qPCR kit (#F-416L)  
905 was used. Gene-specific primer sets were used for the reaction (Table at the end of the Methods  
906 section) under the following conditions: 95°C for 15 min, 40 cycles of 95°C for 20 sec, 60°C for  
907 25 sec and 72°C for 30 sec followed by the dissociation cycle for melt curve generation. Each  
908 sample was run either in duplicate or triplicate. GAPDH (Glyceraldehyde 3-phosphate  
909 dehydrogenase), ACTB (beta actin), 18S rRNA, RPL35a (ribosomal protein L35a) and *ATP5G1*  
910 [ATP synthase, H<sup>+</sup> transporting, mitochondrial F<sub>0</sub> complex, subunit C1 (subunit 9)] were used as  
911 reference genes for human gene expression analysis. For mouse gene expression analysis,

912 Cyclophilin was used as a housekeeping gene.  $\Delta\Delta\text{CT}$  method was used for the calculation of gene  
913 expression, which was transformed to  $\log_2$  ratio and then to absolute scale for plotting.

#### 914 **Western Blotting**

915 For Western blot analysis, cell pellets were lysed in RIPA lysis buffer (containing 1 mM  
916 sodium orthovanadate, 5mM sodium fluoride, 1 mM phenylmethanesulfonyl fluoride and 1X  
917 protease inhibitor cocktail, Sigma, USA), and proteins were isolated from the cells by spinning at  
918 13,000 rpm for 30 mins. The supernatant, containing the proteins was collected. Protein  
919 concentrations were measured using the Bradford's reagent and a standard BSA curve was used  
920 to determine the protein concentrations. Equal amounts of proteins from all conditions were mixed  
921 with protein loading dye (1X), denatured at 95°C for 15 mins, loaded in each well of an SDS  
922 polyacrylamide gel and the gel was run for around 8 hours. For preparation of SDS-  
923 polyacrylamide gel, resolving and stacking gels were prepared at a concentration of 10-12  
924 concentrations.. The gel was run at 70V-100V and then the proteins were transferred onto a  
925 polyvinyl fluoride (PVDF) membrane using the semi-dry transfer method. After the transfer, the  
926 membrane was blocked using 5% skimmed milk in 1X Tris-buffered saline-Tween (TBST) for 1  
927 h. Subsequently, the membrane was washed in TBST for 30 min and probed initially with primary  
928 antibodies in 5% BSA-TBST for 14-16 hours at 4°C. Then the membrane was washed in TBST  
929 for 30 min and secondary antibody, diluted in 5% skimmed milk in TBST was added and incubated  
930 at room temperature for 2-3 h. Finally, the blot was washed and developed using Perkin-Elmer  
931 ECL Plus lightning and Biorad Clarity and Clarity Plus ECL chemiluminescent reagent using GE  
932 Image Quant machine.

#### 933 **Chromatin immunoprecipitation (ChIP)**

934 ChIP assay was conducted with chromatin isolated from ST1 cells treated with 10  $\mu\text{M}$   
935 TGF $\beta$  RI inhibitor (SB431542) and DMSO for 6 hrs. Briefly, after cross-linking, the nuclei were  
936 prepared and sonicated to generate chromatin fragments between 100 and 10,000 bp following the  
937 manufacturer's protocol using Simple Chromatin Immunoprecipitation kit (CST; Cat no. 9003).  
938 The sheared chromatin was collected by centrifugation (10000g for 10 min at 4°C) and a 10  $\mu\text{L}$   
939 aliquot was removed to serve as a positive input sample. Aliquots of 100  $\mu\text{L}$  sheared chromatin

940 were incubated with 2  $\mu\text{g}$  of the required antibody/antibodies followed by Protein G magnetic  
941 beads for the stipulated time. An equal amount of IgG and H3 antibodies were used as controls.  
942 The eluted DNA was analyzed by quantitative PCR using the FMOD promoter-specific primer set  
943 ChIP-F/ChIP-R (in list of primers) to amplify the desired region in FMOD promoter. Conditions  
944 of linear amplification were determined empirically for this primer. The PCR conditions were as  
945 follows: 95°C for 5min; 95°C for 30 sec, 56°C for 30 s and 72°C for 30 s for 35 cycles. PCR  
946 products were resolved by electrophoresis on a 2% agarose gel and visualized after ethidium  
947 bromide staining. Real time qPCR was performed with the same eluted DNA. The conditions were  
948 as follows: 95°C for 3 min; 95°C for 10 sec, 56°C for 30 sec, 72°C for 30 s for 40 cycles and 72°C  
949 for 5 mins. The Ct values of different conditions were normalized to Ct values in IgG control.

#### 950 **Boyden chamber assay for cell migration**

951 Trans-well assay was done in 24-well Boyden chambers with 8- $\mu\text{m}$  pore size polycarbonate  
952 membranes (BD Biosciences, San Diego, USA). ST1 cells ( $5 \times 10^4$ ) were re-suspended in 500  $\mu\text{l}$   
953 serum-free Medium 199 and placed in the upper chamber, and the lower chamber was filled with  
954 serum-free Medium 199 with 750  $\mu\text{l}$  conditioned medium or 400nm final concentration of  
955 recombinant protein dissolved in incomplete medium (serving as a chemo-attractant). After 24  
956 hours of incubation, cells remaining on the upper surface of the membrane were removed with a  
957 wet cotton bud. The cells that have migrated to the lower surface of the membrane were fixed in  
958 ice-cold methanol and stained with crystal violet and imaged in a light microscope.

#### 959 **Boyden chamber assay for cell invasion**

960 Trans-well assay was done in 24-well Boyden chambers with 8- $\mu\text{m}$  pore size polycarbonate  
961 membranes coated with Matrigel (BD Biosciences, San Diego, USA). ST1 cells ( $5 \times 10^4$ ) were re-  
962 suspended in 500  $\mu\text{l}$  serum-free Medium 199 and placed in the upper chamber, and the lower  
963 chamber was filled with serum-free Medium 199 with 750  $\mu\text{l}$  conditioned medium or 400nm final  
964 concentration of recombinant protein dissolved in an incomplete medium (serving as a chemo-  
965 attractant). After 24 hours of incubation, cells remaining on the upper surface of the membrane  
966 were removed with a wet cotton bud. The cells that have invaded to the lower surface of the  
967 membrane were fixed in ice-cold methanol and stained with crystal violet and imaged in a light  
968 microscope.

969

970 **Cell proliferation assay (MTT assay)**

971 1.5 x 10<sup>3</sup> ST1 cells were plated 2% FBS-containing M199 Medium in each well of a 96-  
972 well plate. MTT assay was performed as per the established protocol. MTT was added to each well  
973 and Formazan crystals formed after 3 hours of incubation were dissolved in DMSO and the  
974 absorbance was measured at 420 nm. The first reading served as the untreated condition (0<sup>th</sup> time-  
975 point). After this reading, the cells were treated with 400nm rhFMOD or an equivalent  
976 concentration of BSA, and readings were taken every 24 hrs, till 96 hours. The cell viability was  
977 then plotted as a line graph.

978 ***In vitro* angiogenesis assay**

979 ST1 endothelial cells were seeded in 96-well plates (10,000-15,000 cells per well), coated  
980 with Geltrex (Invitrogen) and grown in Medium 199 (Sigma) without growth factors. Equal protein  
981 amounts (50-100 µg) from serum-free conditioned media from different conditions were added on  
982 top of the cells. After 10-12 hours of incubation, endothelial cells form tube-like structures. Each  
983 complete circular structure was considered as one complete network and the total number of  
984 networks for each condition was counted in a double-blind manner. For positive control, cells are  
985 plated in complete endothelial cell media (Medium 199) supplemented with Endothelial Cell  
986 Growth Factors (ECGS) and 20% FBS, and in the negative control, cells are plated in incomplete  
987 Medium 199 (without serum and ECGS).

988 **Immunofluorescence staining of fixed cells**

989 Cells were plated on coverslips in 12-well plates and allowed to attach. The cells were then  
990 fixed with 4% paraformaldehyde and permeabilized using PBS supplemented with 0.25% Triton-  
991 X100. Cells were then washed with PBS and blocked using PBS supplemented with 1% BSA,  
992 0.3% Triton X-100 and 5% goat serum for 2 h at room temperature. After blocking, primary  
993 antibody, diluted in the blocking buffer, was added to the coverslips overnight at 4°C. For dual  
994 staining, the primary antibodies (one anti-mouse and the other anti-rabbit) were together added to  
995 the samples in the required dilutions. After removal of the primary antibody, cells were thoroughly  
996 washed with PBS 3 times for 5 mins each. Fluorescence-conjugated secondary antibody was  
997 dissolved in the blocking buffer and added to the cells for 3 h, after which the cells were washed  
998 three times with PBS for 5 min. The cells were stained with DAPI (1 µl/ml) for 5 min at room

999 temperature. Coverslips were mounted on glass slides using glycerol as mounting agent and  
1000 imaged using a Zeiss LSM 880 confocal microscope.

### 1001 **Luciferase reporter assay**

1002 Cells were seeded in a 6-well plates and co-transfected with the reporter luciferase construct  
1003 and pCMV-beta gal (as control), using lipofectamine according to the manufacturer's instructions.  
1004 24-48 h after transfection, cell extracts were made in reporter lysis buffer (Promega). Protein  
1005 concentrations of the cell lysates were measured by Bradford assay reagent (Bio-Rad). Ten µg  
1006 protein were mixed with 30 µl of luciferase assay reagent (LAR) to determine the luciferase  
1007 activity and values were normalized to beta-galactosidase activity units.

### 1008 **Flow cytometry**

1009 The GSCs and DGCs are pelleted down and stained with live dead fluorescent stain  
1010 (L34955 LIVE/DEAD™ Fixable Violet Dead Cell Stain Kit, for 405 nm excitation) for 15  
1011 mins at 37 °C. Then, the cells are blocked using 10% FCS and 1% Sodium Azide in PBS. After  
1012 blocking, the cells are washed with PBS thrice, incubated with primary antibody for 2 hrs at room  
1013 temperature, washed again thrice, and incubated with the secondary antibody for 2 hrs in the dark.  
1014 The final pellet is washed thrice with PBS, dissolved in 200 µl 3% BSA in PBS and analysed using  
1015 the BD FACS Verse flow cytometer.

### 1016 **RPPA analysis**

1017 Untreated ST1 cells and cells treated for 10, 30, and 60 mins with 400 nm rhFMOD were  
1018 lysed using RPPA lysis buffer. Lysates were serially diluted in 5 two-fold dilutions using lysis  
1019 buffer and printed on nitrocellulose-coated slides using an Aushon Biosystem 2470 arrayer. Slides  
1020 were probed with 304 validated primary antibodies followed by detection with appropriate  
1021 biotinylated secondary antibodies. Slides were scanned, analyzed, and quantified using Array-pro  
1022 Analyzer software (Media Cybernetics) to generate spot intensity (level 1 data). Signals were  
1023 visualized by a secondary streptavidin-conjugated HRP antibody and DAB colorimetric reaction.  
1024 The list of 304 antibodies can be found at the link provided  
1025 ([http://www.mdanderson.org/research/research-resources/core-facilities/functional-proteomics-  
1026 rppa-core/antibody-information-and-protocol.html](http://www.mdanderson.org/research/research-resources/core-facilities/functional-proteomics-rppa-core/antibody-information-and-protocol.html)).

### 1027 **Cryo-sectioning of fixed mouse brain**

1028 Mice were perfused intracardially using 4% paraformaldehyde solution and the brains  
1029 were harvested and stored in PFA for 12 h and subsequently in 30% sucrose solution. The brains  
1030 were then embedded in Poly-freeze solution (Sigma, #35059990) and sectioned into 20- $\mu$ m thick  
1031 sections using a Leica Cryostat. The sections were stored in -80°C in Tissue Cutting Solution  
1032 (TCS).

### 1033 **IHC of free-floating sections**

1034 For immunofluorescence, the brain sections were removed from TCS, put in 96-well plates  
1035 and washed thoroughly with PBS. Following that, the same protocol was followed for  
1036 immunofluorescence staining of tissue sections, as that followed for monolayer cells grown on  
1037 coverslips. At the final step, after adding the secondary antibody, DAPI and PBS washes, the  
1038 sections were individually mounted on glass slides using the ProLong™ Glass Antifade  
1039 Mountant (Invitrogen, #P36980) and covered by coverslips. Images were taken using the Zeiss  
1040 LSM 880 confocal microscope using 10x, 20x, and 40x objectives, for various conditions.

1041 For immunofluorescence of FFPE sections, an extra step of antigen retrieval was performed  
1042 by de-paraffinizing the sections in xylene, followed by boiling in distilled water twice, for 5 mins  
1043 each. After this, the rest of the steps (from permeabilization to mounting, the same steps were  
1044 followed as that of immunofluorescence of free-floating sections.

### 1045 **Scoring methods for confocal images**

1046 The areas of the blood vessels and the fluorescence intensities for all the fluorophores used  
1047 in the tissue sections were measured using the Zeiss black software  
1048 (<https://www.zeiss.com/microscopy/int/products/microscope-software.html>), converted to  
1049 percentages and plotted as bar diagrams. For determining the extent of vascular mimicry in the  
1050 blood vessels of the tissues, the overlap of green (coming from GFP of the tumor cells) and red  
1051 (measure of CD31 expression of the endothelial cells) forming yellow color was calculated as a  
1052 measure of co-localization coefficients in the Zeiss black software. The absolute values of the co-  
1053 localization coefficients were plotted for each condition.

1054



## 1055 **Subcutaneous injection of DBT-Luc cells for the co-implantation mouse model**

1056 All animal procedures followed were approved by the Institute Ethical Committee for  
1057 Animal Experimentation. Mouse cell line DBT-Luc-DGC, which grows as a monolayer cell line  
1058 (stable for luciferase expression), were reprogrammed to form DBT-Luc-GSCs. A combination of  
1059  $10^5$  DBT-Luc-GSCs (without any shRNA) and  $10^6$  DBT-Luc-DGCs that carried either the miRNT  
1060 or miRFMOD constructs (referred to as DBT-Luc-DGC/miRNT or DBT-Luc-DGC/miRFMOD  
1061 respectively) were injected subcutaneously in the mice. Two groups of mice (n=5 each) received  
1062 a combination of  $10^5$  DBT-Luc-GSCs +  $10^6$  DBT-Luc-DGC/miRNT and another two groups (n=5  
1063 each) received a combination of  $10^5$  DBT-Luc/GSCs +  $10^6$  DBT-Luc-DGC/miRFMOD (only one  
1064 of the two groups for both miRNT and miRFMOD received Doxycycline). Doxycycline injection  
1065 (intraperitoneal, 100  $\mu$ g per animal) began on 9<sup>th</sup> day post the injection and was given on every  
1066 day up to the 16<sup>th</sup> day, after which it was given on every alternate day, till the end of the experiment.  
1067 Since the Doxycycline administration induced the mCherry expression along with the shRNA  
1068 expression, the animals were imaged for both bioluminescence (marked by red on the timeline)  
1069 and fluorescence (marked by orange on the timeline) on the days indicated in the timeline. Two  
1070 other groups (n=5 each) received either only  $10^5$  DBT-Luc-GSCs or  $10^6$  DBT-Luc-DGCs (not  
1071 stables for any shRNA), as controls.

## 1072 **Intra-cranial injection of GBM cells**

1073 Cells were harvested in incomplete DMEM or NBM depending on the cell type to be  
1074 injected. 250,000 DGCs or 100,000 GSCs were injected intracranially (in the hippocampus, 3 mm  
1075 deep) in each animal using a stereotaxic apparatus. The animals were imaged on the 3<sup>rd</sup> day after  
1076 injection and subsequently, every 5 to 6 days until the end of the experiment. In experiments using  
1077 inducible shRNAs, doxycycline was injected every day for 10 days (from 13<sup>th</sup> day after injection)  
1078 and on every alternate day until the end of the experiment. MGG8-GSC (MGG8-GSC/shNT vs.  
1079 MGG8-GSC/shFMOD), AGR53-GSCs (AGR53-GSC/miRNT vs. AGR53-GSC/miRFMOD), and  
1080 DBT-Luc-GSCs (DBT-Luc-GSC/miRFMOD) cells were intracranially injected in this study.

1081

1082

1083 ***In vivo* imaging**

1084 *In vivo* imaging was done for bioluminescence or fluorescence with the Perkin Elmer IVIS  
1085 Spectrum by using mild gas anesthesia (using isoflurane) for the animals.

1086 **Hematoxylin and Eosin staining**

1087 Brains from perfused mice were paraffin embedded and sectioned using a microtome (5 $\mu$   
1088 sections). Sections were mounted on glass slides and removed from paraffin, rehydrated and  
1089 stained with Harris Hematoxylin for nuclear staining and Eosin Y solution for cytoplasmic  
1090 staining. The sections were then mounted using DPX mounting medium and imaged at 0.8X using  
1091 a Lawrence and Mayo digital microscope.

1092 **Gene Set Enrichment Analysis (GSEA)**

1093 The differentially expressed genes between the GSC and DGC (as identified in GSE54792)  
1094 were pre-ranked based on fold change and used as an input to perform GSEA. All the gene sets  
1095 available in the Molecular Signature Database (MSigDB, roughly 18,000 gene sets) were used to  
1096 run the GSEA. We filtered out the TGF-beta pathway related gene sets to identify that most of  
1097 them were significantly enriched in the DGCs over the GSCs. Similarly, the same analysis was  
1098 carried out in multiple publicly available GBM vs. normal samples datasets to show the significant  
1099 enrichment of TGF-beta gene sets in GBM over normal. We acknowledge our use of the GSEA  
1100 software and MSigDB (Subramanian et al., 2005) (<http://www.broad.mit.edu/gsea/>). [Single](#)

1101 **Single Sample GSEA (ssGSEA)**

1102 Gene set variation analysis (gsva) was performed using ssGSEA to determine the enrichment of  
1103 the different molecular subtypes of GBM in GSE54792 and also the enrichment of the TGF-beta  
1104 Hallmark gene set from MSigDb. The higher gsva score indicates the highest enrichment which  
1105 gradually decreases.

1106 **Survival analysis**

1107 Kaplan-Meier survival analysis was done using GraphPad Prism 5.0 (GraphPad Software,  
1108 San Diego, California, USA).

1109 **Heatmap generation**

1110 The heatmaps were generated using the Multiple Experiment Viewer (MEV) software  
1111 (<http://www.tm4.org/mev.html>) version 4.8.1. LFQ values for protein expression from mass-spec

1112 data, mean pixel density for the RPPA were used as inputs for Heatmap generation. A non-  
 1113 parametric t-test was performed with a false discovery rate (FDR) and a p-value cut-off of 0.05.

1114 **Quantification and Statistical analysis**

1115 Bar diagrams are generated using Microsoft excel. The box plots are generated using  
 1116 GraphPad Prism 5.0 (GraphPad Software, San Diego, California, USA). p-value is calculated by  
 1117 unpaired t test with Welch's correction are indicated or student t-test was done using Microsoft  
 1118 Excel. ANOVA p value was calculated using GraphPad Prism 5 software. p value less than 0.05  
 1119 is considered significant with \*, \*\*, \*\*\* representing p value less than 0.05, 0.01 and 0.001  
 1120 respectively. ns stands for non-significant.

1121 **List of primer used in this study**

|    |               |                         |                         |
|----|---------------|-------------------------|-------------------------|
| 1  | FMOD          | ACCTGCAGCTTGGAGAAGT     | CAACACCAACCTGGAGAACC    |
| 2  | SOX2          | AACCCCAAGATGCACAACCTC   | GCTTAGCCTCGTCGATGAAC    |
| 3  | SALL2         | TAATCTCGGACTGCGAAGGT    | TAGAACATGCGTTCTGGTGG    |
| 4  | POU3F2        | TGACGATCTCCACGCAGTAG    | GGCAGAAAGCTGTCCAAGTC    |
| 5  | OLIG2         | CCAGAGCCCGATGACCTTTT    | AGGACGACTTGAAGCCACTG    |
| 6  | DLL4          | CTGCGAGAAGAAAGTGGACAGG  | ACAGTCGCTGACGTGGAGTTCA  |
| 7  | DLL3          | CACTCAACAACCTAAGGACGCAG | GAGCGTAGATGGAAGGAGCAGA  |
| 8  | JAG1          | TGCTACAACCGTGCCAGTGACT  | TCAGGTGTGTCGTTGGAAGCCA  |
| 9  | JAG2          | GCTGCTACGACCTGGTCAATGA  | AGGTGTAGGCATCGCACTGGAA  |
| 10 | HES1          | GGAAATGACAGTGAAGCACCTCC | GAAGCGGGTCACCTCGTTCATG  |
| 11 | Mouse<br>FMOD | CCCTTACCCCTATGAGCCC     | GACAGTCGCATTCTTGGGGA    |
| 12 | OSMR          | CATCCCGAAGCGAAGTCTTGG   | GGCTGGGACAGTCCATTCTAAA  |
| 13 | ACSBG1        | GAACATCTGGTGCACGGTATAG  | GAGGAAGCTGGTGGAGTATTG   |
| 14 | ALDH1L        | GAGGAAGCTGGTGGAGTATTG   | ACGGTTGGCTGAAAGAAGAA    |
| 15 | S100B         | CCCTGTAGAAGAGTCACCTGTA  | GCTGTGGGTCTGTAGATGTATG  |
| 16 | GFAP          | CGGAGACGCATCACCTCTG     | AGGGAGTGGAGGAGTCATTCG   |
| 17 | MELK          | TATGAAACGATTGGGACAGGTG  | CCCTAGCGCATTCTTATCCATGA |
| 18 | NESTIN        | GGAATCTCTGAGGTCTCTTGATG | TCTGCTCCTCTTCTTACTT     |
| 19 | BMI1          | CAAGAAGAGGTGGAGGGAATAC  | CCAGAGAGATGGACTGACAAAT  |

|    |                       |                                 |                            |
|----|-----------------------|---------------------------------|----------------------------|
| 20 | KLF4                  | GTGCCCCGACTAACCGTTG             | GTCGTTGAACTCCTCGGTCT       |
| 21 | TWIST2                | CCAAGGCTCTCAGAACAAGAA           | GGAGACGTAAAGAACAGGAGTATG   |
| 22 | PTGS2                 | TGAGCAACTATTCCAAACCAGC          | GCACGTAGTCTTCGATCACTATC    |
| 23 | S100A6                | ATGGCATGCCCTCTGGATCAG           | TTATTTTCAGAGCTTCATTGTAGATC |
| 24 | Cyclophilin           | CAGACGCCACTGTCGCTTT             | TGTCTTTGGAACCTTTGTCTG      |
| 25 | ATP5G                 | CCAGACGGGAGTTCCAGAC             | GACGGGTTCTGTCATAGC         |
| 26 | GAPDH                 | TTGTCAAGCTCATTTCCCTGG           | TGATGGTACATGACAAGGTGC      |
| 27 | cPPT (for sequencing) | GAAGGAATAGAAGAAGAAGGT<br>GGAGAG |                            |
| 28 | KLF8                  | CCTGAAAGCTCACCGCAGAATC          | TGCTTGCGGAAATGGCGAGTGA     |
| 29 | FOXP1                 | CAAAGAACGCCTGCAAGCCATG          | GGAGTATGAGGTAAGCTCTGTGG    |
| 30 | ETS1                  | GAGTCAACCCAGCCTATCCAGA          | GAGCGTCTGATAGGACTCTGTG     |
| 31 | GATA4                 | GCGGTGCTTCCAGCAACTCCA           | GACATCGCACTGACTGAGAACG     |
| 32 | ATF2                  | GGTAGCGGATTGGTTAGGACTC          | TGCTCTTCTCCGACGACCACTT     |
| 33 | ITGB1                 | GGATTCTCCAGAAGGTGGTTTCG         | TGCCACCAAGTTTCCCATCTCC     |
| 34 | ITGA6                 | CGAAACCAAGGTTCTGAGCCCA          | CTTGGATCTCCACTGAGGCAGT     |
| 35 | ITGAV                 | AGGAGAAGGTGCCTACGAAGCT          | GCACAGGAAAGTCTTGCTAAGGC    |

1122

1123 **List of shRNAs used in the study (all IDs are of Sigma TRC whole-genome shRNA library)**

| Sl.no | Gene Name  | Clone 1                        | Clone 2        | Clone 3        | Clone 4        | Clone 5        |
|-------|------------|--------------------------------|----------------|----------------|----------------|----------------|
| 16    | FMOD       | TRCN0000153650                 | TRCN0000156734 | TRCN0000152163 | TRCN0000153199 | TRCN0000151908 |
| 17    | Mouse FMOD | <a href="#">TRCN0000094246</a> | TRCN0000094245 | TRCN0000094248 |                |                |
| 18    | KLF8       | TRCN0000015878                 | TRCN0000015879 | TRCN0000015880 | TRCN0000015881 | TRCN0000015882 |
| 19    | JAG1       | TRCN0000033439                 | TRCN0000033440 | TRCN0000033441 | TRCN0000033442 | TRCN0000033443 |
| 20    | ITGA6      | TRCN0000057773                 | TRCN0000057774 | TRCN0000057775 | TRCN0000057776 | TRCN0000057777 |
| 21    | ITGB1      | TRCN0000275134                 | TRCN0000275133 | TRCN0000275083 | TRCN0000275135 | TRCN0000275082 |
| 22    | ITGAV      | TRCN0000003238                 | TRCN0000003239 | TRCN0000003240 | TRCN0000003241 |                |

1124

1125

1126 **List of inhibitors used:**

| S.No. | Inhibitor Name                   | Target Molecule          | Catalog Number        |
|-------|----------------------------------|--------------------------|-----------------------|
| 1     | Gamma- secretase inhibitor (GSI) | Gamma Secretase          | 565750 (Merck)        |
| 2     | RGD Peptide                      | Integrins                | A5082 (Sigma Aldrich) |
| 3     | PP2                              | Src                      | P0042 (Sigma Aldrich) |
| 4     | PP3                              | Structural analog to PP2 | 529574 (Calbiochem)   |
| 5     | H1152                            | ROCK1                    | 555550 (Calbiochem)   |

|   |                |         |                        |
|---|----------------|---------|------------------------|
| 6 | RAC1 inhibitor | RAC1    | 553502 (Sigma Aldrich) |
| 7 | PF573228       | FAK     | PZ0117 (Sigma Aldrich) |
| 8 | SB431542       | TGFB RI | 616464 (Sigma Aldrich) |

1127

## 1128 **Supplemental item titles**

- 1129 1) Supplementary information
- 1130 2) Supplementary figure legends
- 1131 3) Supplementary Figures 1-28
- 1132 4) Supplementary Table S1
- 1133 5) Supplementary Table S2
- 1134 6) Supplementary Table S3

1135

## 1136 **References**

1137

- 1138 Angara, K., Borin, T.F., and Arbab, A.S. (2017). Vascular Mimicry: A Novel Neovascularization  
1139 Mechanism Driving Anti-Angiogenic Therapy (AAT) Resistance in Glioblastoma. *Transl Oncol*  
1140 *10*, 650-660. [10.1016/j.tranon.2017.04.007](https://doi.org/10.1016/j.tranon.2017.04.007).
- 1141 Angel, I., Pilo Kerman, O., Rousso-Noori, L., and Friedmann-Morvinski, D. (2020). Tenascin C  
1142 promotes cancer cell plasticity in mesenchymal glioblastoma. *Oncogene* *39*, 6990-7004.  
1143 [10.1038/s41388-020-01506-6](https://doi.org/10.1038/s41388-020-01506-6).
- 1144 Auffinger, B., Tobias, A.L., Han, Y., Lee, G., Guo, D., Dey, M., Lesniak, M.S., and Ahmed,  
1145 A.U. (2014). Conversion of differentiated cancer cells into cancer stem-like cells in a  
1146 glioblastoma model after primary chemotherapy. *Cell Death Differ* *21*, 1119-1131.  
1147 [10.1038/cdd.2014.31](https://doi.org/10.1038/cdd.2014.31).
- 1148 Bao, S., Wu, Q., Sathornsumetee, S., Hao, Y., Li, Z., Hjelmeland, A.B., Shi, Q., McLendon,  
1149 R.E., Bigner, D.D., and Rich, J.N. (2006). Stem cell-like glioma cells promote tumor  
1150 angiogenesis through vascular endothelial growth factor. *Cancer Res* *66*, 7843-7848.  
1151 [10.1158/0008-5472.CAN-06-1010](https://doi.org/10.1158/0008-5472.CAN-06-1010).
- 1152 Bartolini, A., Cardaci, S., Lamba, S., Oddo, D., Marchio, C., Cassoni, P., Amoreo, C.A., Corti,  
1153 G., Testori, A., Bussolino, F., et al. (2016). BCAM and LAMA5 Mediate the Recognition  
1154 between Tumor Cells and the Endothelium in the Metastatic Spreading of KRAS-Mutant  
1155 Colorectal Cancer. *Clin Cancer Res* *22*, 4923-4933. [10.1158/1078-0432.CCR-15-2664](https://doi.org/10.1158/1078-0432.CCR-15-2664).
- 1156 Bazzoni, R., and Bentivegna, A. (2019). Role of Notch Signaling Pathway in Glioblastoma  
1157 Pathogenesis. *Cancers (Basel)* *11*. [10.3390/cancers11030292](https://doi.org/10.3390/cancers11030292).
- 1158 Calabrese, C., Poppleton, H., Kocak, M., Hogg, T.L., Fuller, C., Hamner, B., Oh, E.Y., Gaber,  
1159 M.W., Finklestein, D., Allen, M., et al. (2007). A perivascular niche for brain tumor stem cells.  
1160 *Cancer Cell* *11*, 69-82. [10.1016/j.ccr.2006.11.020](https://doi.org/10.1016/j.ccr.2006.11.020).
- 1161 Carnero, A., and Leonart, M. (2016). The hypoxic microenvironment: A determinant of cancer  
1162 stem cell evolution. *Bioessays* *38 Suppl 1*, S65-74. [10.1002/bies.201670911](https://doi.org/10.1002/bies.201670911).
- 1163 Dittmer, J., and Leyh, B. (2014). Paracrine effects of stem cells in wound healing and cancer  
1164 progression (Review). *Int J Oncol* *44*, 1789-1798. [10.3892/ijo.2014.2385](https://doi.org/10.3892/ijo.2014.2385).
- 1165 Friedmann-Morvinski, D., Bushong, E.A., Ke, E., Soda, Y., Marumoto, T., Singer, O., Ellisman,  
1166 M.H., and Verma, I.M. (2012). Dedifferentiation of neurons and astrocytes by oncogenes can  
1167 induce gliomas in mice. *Science* *338*, 1080-1084. [10.1126/science.1226929](https://doi.org/10.1126/science.1226929).

- 1168 Friedmann-Morvinski, D., and Verma, I.M. (2014). Dedifferentiation and reprogramming:  
1169 origins of cancer stem cells. *EMBO Rep* *15*, 244-253. 10.1002/embr.201338254.
- 1170 Galli, R., Binda, E., Orfanelli, U., Cipelletti, B., Gritti, A., De Vitis, S., Fiocco, R., Foroni, C.,  
1171 Dimeco, F., and Vescovi, A. (2004). Isolation and characterization of tumorigenic, stem-like  
1172 neural precursors from human glioblastoma. *Cancer Res* *64*, 7011-7021. 10.1158/0008-  
1173 5472.CAN-04-1364.
- 1174 Gridley, T. (2007). Notch signaling in vascular development and physiology. *Development* *134*,  
1175 2709-2718. 10.1242/dev.004184.
- 1176 Hambardzumyan, D., and Bergers, G. (2015). Glioblastoma: Defining Tumor Niches. *Trends*  
1177 *Cancer* *1*, 252-265. 10.1016/j.trecan.2015.10.009.
- 1178 Hardee, M.E., and Zagzag, D. (2012). Mechanisms of glioma-associated neovascularization. *Am*  
1179 *J Pathol* *181*, 1126-1141. 10.1016/j.ajpath.2012.06.030.
- 1180 Heddleston, J.M., Li, Z., Lathia, J.D., Bao, S., Hjelmeland, A.B., and Rich, J.N. (2010). Hypoxia  
1181 inducible factors in cancer stem cells. *Br J Cancer* *102*, 789-795. 10.1038/sj.bjc.6605551.
- 1182 Huang, W.J., Chen, W.W., and Zhang, X. (2016). Glioblastoma multiforme: Effect of hypoxia  
1183 and hypoxia inducible factors on therapeutic approaches. *Oncol Lett* *12*, 2283-2288.  
1184 10.3892/ol.2016.4952.
- 1185 Ignatova, T.N., Kukekov, V.G., Laywell, E.D., Suslov, O.N., Vrionis, F.D., and Steindler, D.A.  
1186 (2002). Human cortical glial tumors contain neural stem-like cells expressing astroglial and  
1187 neuronal markers in vitro. *Glia* *39*, 193-206. 10.1002/glia.10094.
- 1188 Jeon, H.M., Kim, S.H., Jin, X., Park, J.B., Kim, S.H., Joshi, K., Nakano, I., and Kim, H. (2014).  
1189 Crosstalk between glioma-initiating cells and endothelial cells drives tumor progression. *Cancer*  
1190 *Res* *74*, 4482-4492. 10.1158/0008-5472.CAN-13-1597.
- 1191 Jin, X., Jin, X., and Kim, H. (2017). Cancer stem cells and differentiation therapy. *Tumour Biol*  
1192 *39*, 1010428317729933. 10.1177/1010428317729933.
- 1193 Klevebring, D., Rosin, G., Ma, R., Lindberg, J., Czene, K., Kere, J., Fredriksson, I., Bergh, J.,  
1194 and Hartman, J. (2014). Sequencing of breast cancer stem cell populations indicates a dynamic  
1195 conversion between differentiation states in vivo. *Breast Cancer Res* *16*, R72. 10.1186/bcr3687.
- 1196 Kofler, N.M., Shawber, C.J., Kangsamaksin, T., Reed, H.O., Galatioto, J., and Kitajewski, J.  
1197 (2011). Notch signaling in developmental and tumor angiogenesis. *Genes Cancer* *2*, 1106-1116.  
1198 10.1177/1947601911423030.
- 1199 Long, N.P., Lee, W.J., Huy, N.T., Lee, S.J., Park, J.H., and Kwon, S.W. (2016). Novel  
1200 Biomarker Candidates for Colorectal Cancer Metastasis: A Meta-analysis of In Vitro Studies.  
1201 *Cancer Inform* *15*, 11-17. 10.4137/CIN.S40301.
- 1202 Mondal, B., Patil, V., Shwetha, S.D., Sravani, K., Hegde, A.S., Arivazhagan, A., Santosh, V.,  
1203 Kanduri, M., and Somasundaram, K. (2017). Integrative functional genomic analysis identifies  
1204 epigenetically regulated fibromodulin as an essential gene for glioma cell migration. *Oncogene*  
1205 *36*, 71-83. 10.1038/onc.2016.176.
- 1206 Oldberg, A., Kalamajski, S., Salnikov, A.V., Stuhr, L., Morgelin, M., Reed, R.K., Heldin, N.E.,  
1207 and Rubin, K. (2007). Collagen-binding proteoglycan fibromodulin can determine stroma matrix  
1208 structure and fluid balance in experimental carcinoma. *Proc Natl Acad Sci U S A* *104*, 13966-  
1209 13971. 10.1073/pnas.0702014104.
- 1210 Olmeda, F., and Ben Amar, M. (2019). Clonal pattern dynamics in tumor: the concept of cancer  
1211 stem cells. *Sci Rep* *9*, 15607. 10.1038/s41598-019-51575-1.
- 1212 Pang, X., Dong, N., and Zheng, Z. (2019). Small Leucine-Rich Proteoglycans in Skin Wound  
1213 Healing. *Front Pharmacol* *10*, 1649. 10.3389/fphar.2019.01649.



- 1214 Phng, L.K., and Gerhardt, H. (2009). Angiogenesis: a team effort coordinated by notch. *Dev Cell*  
1215 *16*, 196-208. 10.1016/j.devcel.2009.01.015.
- 1216 Pine, A.R., Cirigliano, S.M., Nicholson, J.G., Hu, Y., Linkous, A., Miyaguchi, K., Edwards, L.,  
1217 Singhanian, R., Schwartz, T.H., Ramakrishna, R., et al. (2020). Tumor Microenvironment Is  
1218 Critical for the Maintenance of Cellular States Found in Primary Glioblastomas. *Cancer Discov*  
1219 *10*, 964-979. 10.1158/2159-8290.CD-20-0057.
- 1220 Prager, B.C., Bhargava, S., Mahadev, V., Hubert, C.G., and Rich, J.N. (2020). Glioblastoma  
1221 Stem Cells: Driving Resilience through Chaos. *Trends Cancer* *6*, 223-235.  
1222 10.1016/j.trecan.2020.01.009.
- 1223 Prager, B.C., Xie, Q., Bao, S., and Rich, J.N. (2019). Cancer Stem Cells: The Architects of the  
1224 Tumor Ecosystem. *Cell Stem Cell* *24*, 41-53. 10.1016/j.stem.2018.12.009.
- 1225 Prasad, P., Mittal, S.A., Chongtham, J., Mohanty, S., and Srivastava, T. (2017). Hypoxia-  
1226 Mediated Epigenetic Regulation of Stemness in Brain Tumor Cells. *Stem Cells* *35*, 1468-1478.  
1227 10.1002/stem.2621.
- 1228 Rheinbay, E., Suva, M.L., Gillespie, S.M., Wakimoto, H., Patel, A.P., Shahid, M., Oksuz, O.,  
1229 Rabkin, S.D., Martuza, R.L., Rivera, M.N., et al. (2013). An aberrant transcription factor  
1230 network essential for Wnt signaling and stem cell maintenance in glioblastoma. *Cell Rep* *3*,  
1231 1567-1579. 10.1016/j.celrep.2013.04.021.
- 1232 Ricci-Vitiani, L., Pallini, R., Biffoni, M., Todaro, M., Invernici, G., Cenci, T., Maira, G., Parati,  
1233 E.A., Stassi, G., Larocca, L.M., and De Maria, R. (2010). Tumour vascularization via endothelial  
1234 differentiation of glioblastoma stem-like cells. *Nature* *468*, 824-828. 10.1038/nature09557.
- 1235 Rupp, T., Langlois, B., Koczorowska, M.M., Radwanska, A., Sun, Z., Hussenet, T., Lefebvre,  
1236 O., Murdamoothoo, D., Arnold, C., Klein, A., et al. (2016). Tenascin-C Orchestrates  
1237 Glioblastoma Angiogenesis by Modulation of Pro- and Anti-angiogenic Signaling. *Cell Rep* *17*,  
1238 2607-2619. 10.1016/j.celrep.2016.11.012.
- 1239 Safa, A.R., Saadatzadeh, M.R., Cohen-Gadol, A.A., Pollok, K.E., and Bijangi-Vishehsaraei, K.  
1240 (2015). Glioblastoma stem cells (GSCs) epigenetic plasticity and interconversion between  
1241 differentiated non-GSCs and GSCs. *Genes Dis* *2*, 152-163. 10.1016/j.gendis.2015.02.001.
- 1242 Short, S.M., Talbott, G.A., and Juliano, R.L. (1998). Integrin-mediated signaling events in  
1243 human endothelial cells. *Mol Biol Cell* *9*, 1969-1980. 10.1091/mbc.9.8.1969.
- 1244 Silva, R., D'Amico, G., Hodivala-Dilke, K.M., and Reynolds, L.E. (2008). Integrins: the keys to  
1245 unlocking angiogenesis. *Arterioscler Thromb Vasc Biol* *28*, 1703-1713.  
1246 10.1161/ATVBAHA.108.172015.
- 1247 Singh, S.K., Hawkins, C., Clarke, I.D., Squire, J.A., Bayani, J., Hide, T., Henkelman, R.M.,  
1248 Cusimano, M.D., and Dirks, P.B. (2004). Identification of human brain tumour initiating cells.  
1249 *Nature* *432*, 396-401. 10.1038/nature03128.
- 1250 Soda, Y., Marumoto, T., Friedmann-Morvinski, D., Soda, M., Liu, F., Michiue, H., Pastorino, S.,  
1251 Yang, M., Hoffman, R.M., Kesari, S., and Verma, I.M. (2011). Transdifferentiation of  
1252 glioblastoma cells into vascular endothelial cells. *Proc Natl Acad Sci U S A* *108*, 4274-4280.  
1253 10.1073/pnas.1016030108.
- 1254 Stockhausen, M.T., Kristoffersen, K., and Poulsen, H.S. (2010). The functional role of Notch  
1255 signaling in human gliomas. *Neuro Oncol* *12*, 199-211. 10.1093/neuonc/nop022.
- 1256 Suva, M.L., Rheinbay, E., Gillespie, S.M., Patel, A.P., Wakimoto, H., Rabkin, S.D., Riggi, N.,  
1257 Chi, A.S., Cahill, D.P., Nahed, B.V., et al. (2014). Reconstructing and reprogramming the tumor-  
1258 propagating potential of glioblastoma stem-like cells. *Cell* *157*, 580-594.  
1259 10.1016/j.cell.2014.02.030.

1260 Thouvenot, E., S. Urbach, C. Dantec, J. Poncet, M. Seveno, E. Demette, P. Jouin, J. Touchon, J.  
1261 Bockaert and P. Marin (2008). "Enhanced detection of CNS cell secretome in plasma protein-  
1262 depleted cerebrospinal fluid." *J Proteome Res* 7(10): 4409-4421.  
1263 Tyanova, S., T. Temu, P. Sinitcyn, A. Carlson, M. Y. Hein, T. Geiger, M. Mann and J. Cox  
1264 (2016). "The Perseus computational platform for comprehensive analysis of (prote)omics data."  
1265 *Nat Methods* 13(9): 731-740.  
1266 Teodorczyk, M., and Schmidt, M.H.H. (2014). Notching on Cancer's Door: Notch Signaling in  
1267 Brain Tumors. *Front Oncol* 4, 341. 10.3389/fonc.2014.00341.  
1268 Wakimoto, H., Kesari, S., Farrell, C.J., Curry, W.T., Jr., Zaupa, C., Aghi, M., Kuroda, T.,  
1269 Stemmer-Rachamimov, A., Shah, K., Liu, T.C., et al. (2009). Human glioblastoma-derived  
1270 cancer stem cells: establishment of invasive glioma models and treatment with oncolytic herpes  
1271 simplex virus vectors. *Cancer Res* 69, 3472-3481. 10.1158/0008-5472.CAN-08-3886.  
1272 Wang, P., Wan, W.W., Xiong, S.L., Feng, H., and Wu, N. (2017). Cancer stem-like cells can be  
1273 induced through dedifferentiation under hypoxic conditions in glioma, hepatoma and lung  
1274 cancer. *Cell Death Discov* 3, 16105. 10.1038/cddiscovery.2016.105.  
1275 Wang, S., Pang, L., Liu, Z., and Meng, X. (2021). SERPINE1 associated with remodeling of the  
1276 tumor microenvironment in colon cancer progression: a novel therapeutic target. *BMC Cancer*  
1277 21, 767. 10.1186/s12885-021-08536-7.  
1278 Wang, X., Prager, B.C., Wu, Q., Kim, L.J.Y., Gimple, R.C., Shi, Y., Yang, K., Morton, A.R.,  
1279 Zhou, W., Zhu, Z., et al. (2018). Reciprocal Signaling between Glioblastoma Stem Cells and  
1280 Differentiated Tumor Cells Promotes Malignant Progression. *Cell Stem Cell* 22, 514-528 e515.  
1281 10.1016/j.stem.2018.03.011.  
1282 Winkler, J., Abisoye-Ogunniyan, A., Metcalf, K.J., and Werb, Z. (2020). Concepts of  
1283 extracellular matrix remodelling in tumour progression and metastasis. *Nat Commun* 11, 5120.  
1284 10.1038/s41467-020-18794-x.  
1285 Yang, L., Shi, P., Zhao, G., Xu, J., Peng, W., Zhang, J., Zhang, G., Wang, X., Dong, Z., Chen,  
1286 F., and Cui, H. (2020a). Targeting cancer stem cell pathways for cancer therapy. *Signal*  
1287 *Transduct Target Ther* 5, 8. 10.1038/s41392-020-0110-5.  
1288 Yang, X., Wang, S., Yu, W., Zheng, Y., and Wu, Y. (2020b). Inhibition of ITGB1 enhance the  
1289 anti-tumor effect of cetuximab in colorectal cancer cell. *Medicine (Baltimore)* 99, e20944.  
1290 10.1097/MD.00000000000020944.  
1291 Zhou, D., Alver, B.M., Li, S., Hlady, R.A., Thompson, J.J., Schroeder, M.A., Lee, J.H., Qiu, J.,  
1292 Schwartz, P.H., Sarkaria, J.N., and Robertson, K.D. (2018). Distinctive epigenomes characterize  
1293 glioma stem cells and their response to differentiation cues. *Genome Biol* 19, 43.  
1294 10.1186/s13059-018-1420-6.  
1295 Zhu, T.S., Costello, M.A., Talsma, C.E., Flack, C.G., Crowley, J.G., Hamm, L.L., He, X.,  
1296 Hervey-Jumper, S.L., Heth, J.A., Muraszko, K.M., et al. (2011). Endothelial cells create a stem  
1297 cell niche in glioblastoma by providing NOTCH ligands that nurture self-renewal of cancer  
1298 stem-like cells. *Cancer Res* 71, 6061-6072. 10.1158/0008-5472.CAN-10-4269.  
1299

**Main figures 1 to 7**

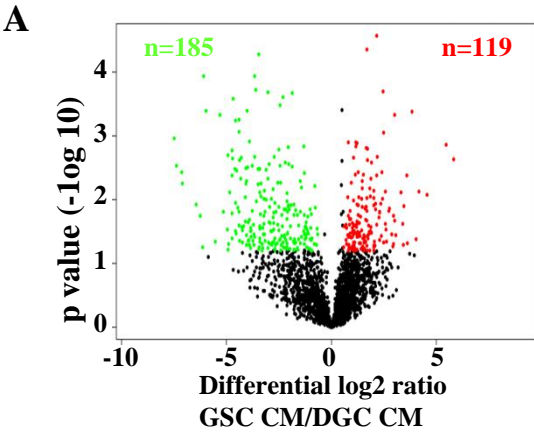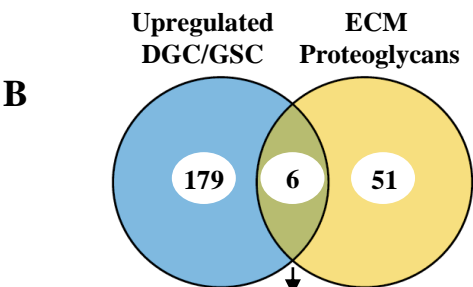

| Name     | log <sub>2</sub> ratio DGC/GSC | p value |
|----------|--------------------------------|---------|
| FMOD     | 4.59                           | 0.00    |
| LAMB2    | 4.31                           | 0.00    |
| SERPINE1 | 3.82                           | 0.04    |
| ITGB1    | 2.74                           | 0.02    |
| TNC      | 2.44                           | 0.00    |
| LAMA5    | 1.93                           | 0.01    |

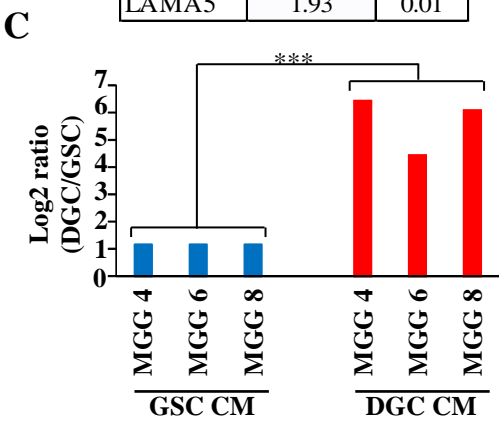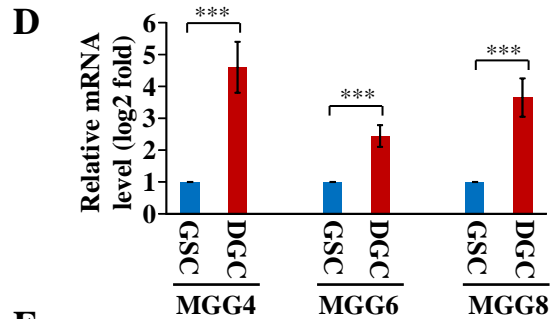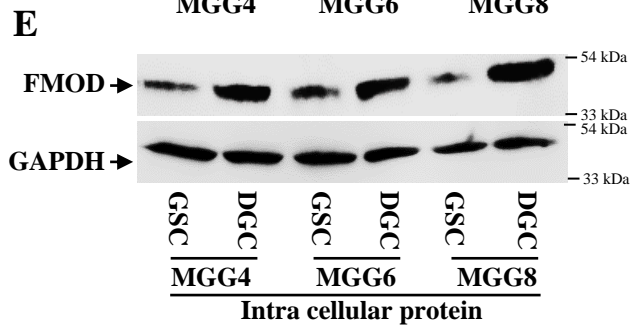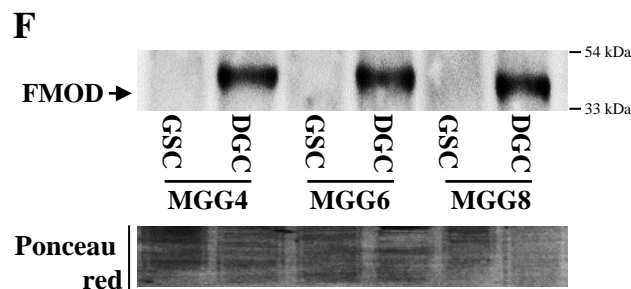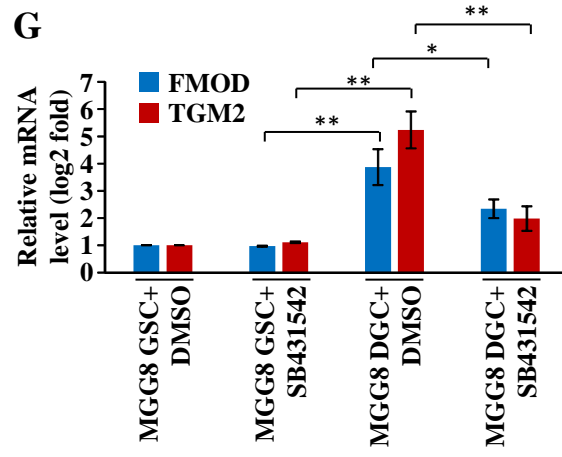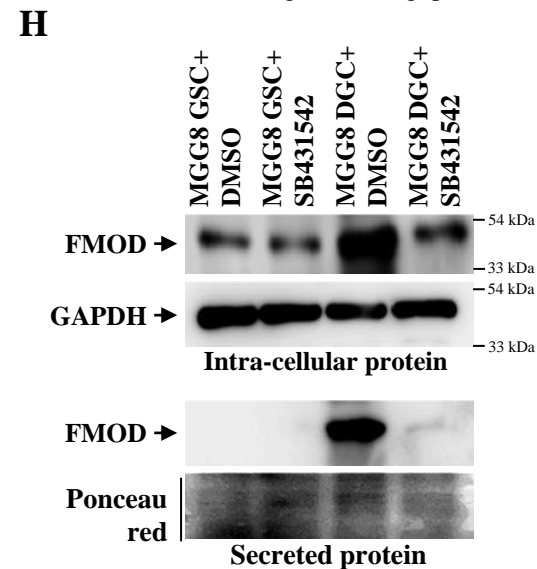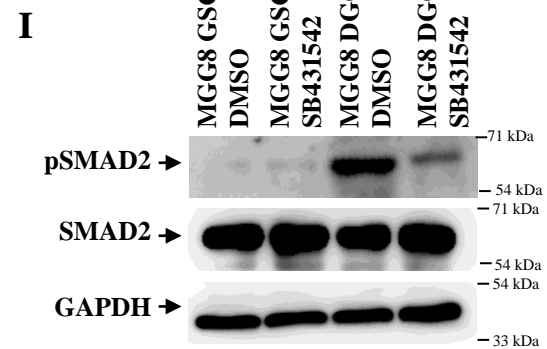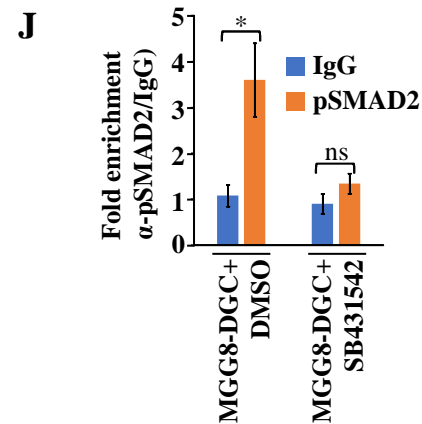

A

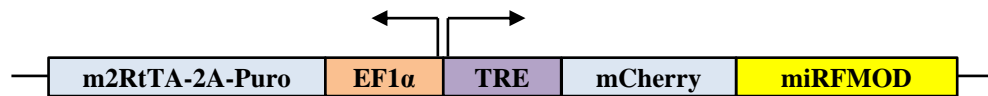

B

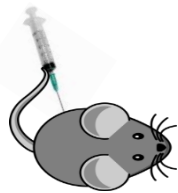

9 days post injection-Doxycycline administration every day up to day 16 and alternate days until the end (as indicated)

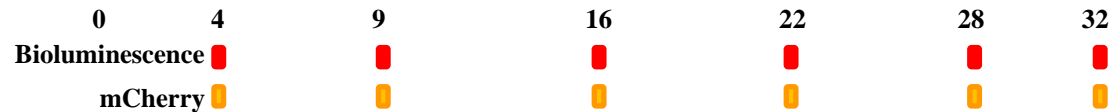

C

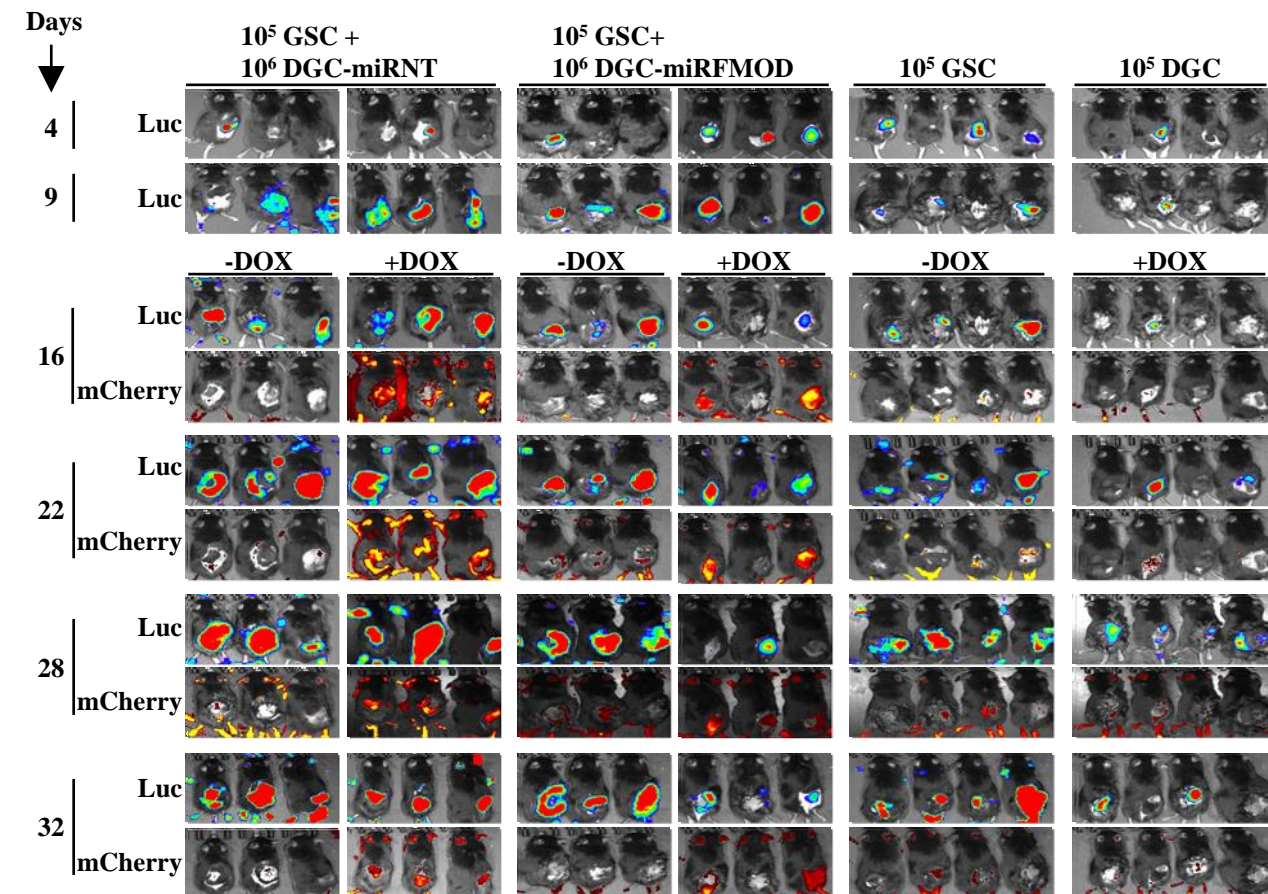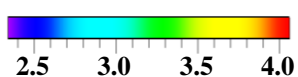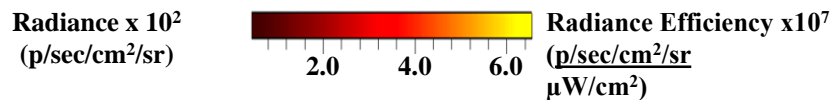

D

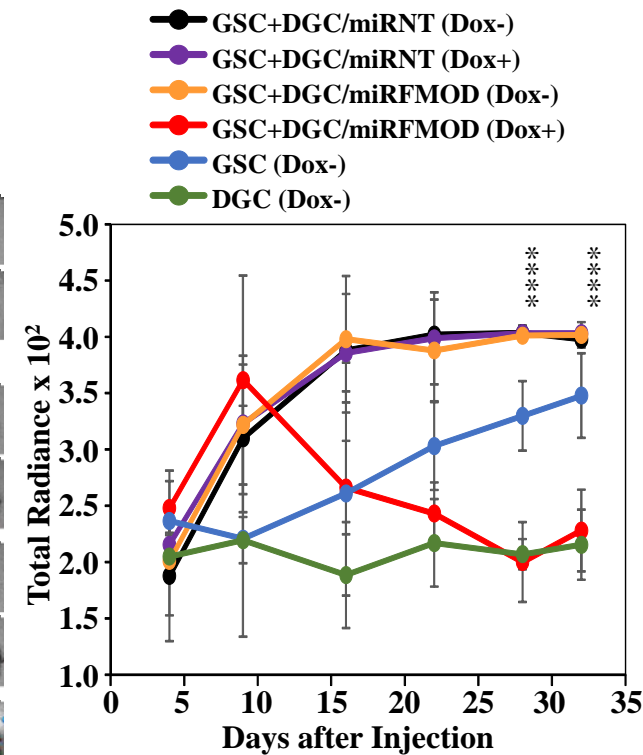



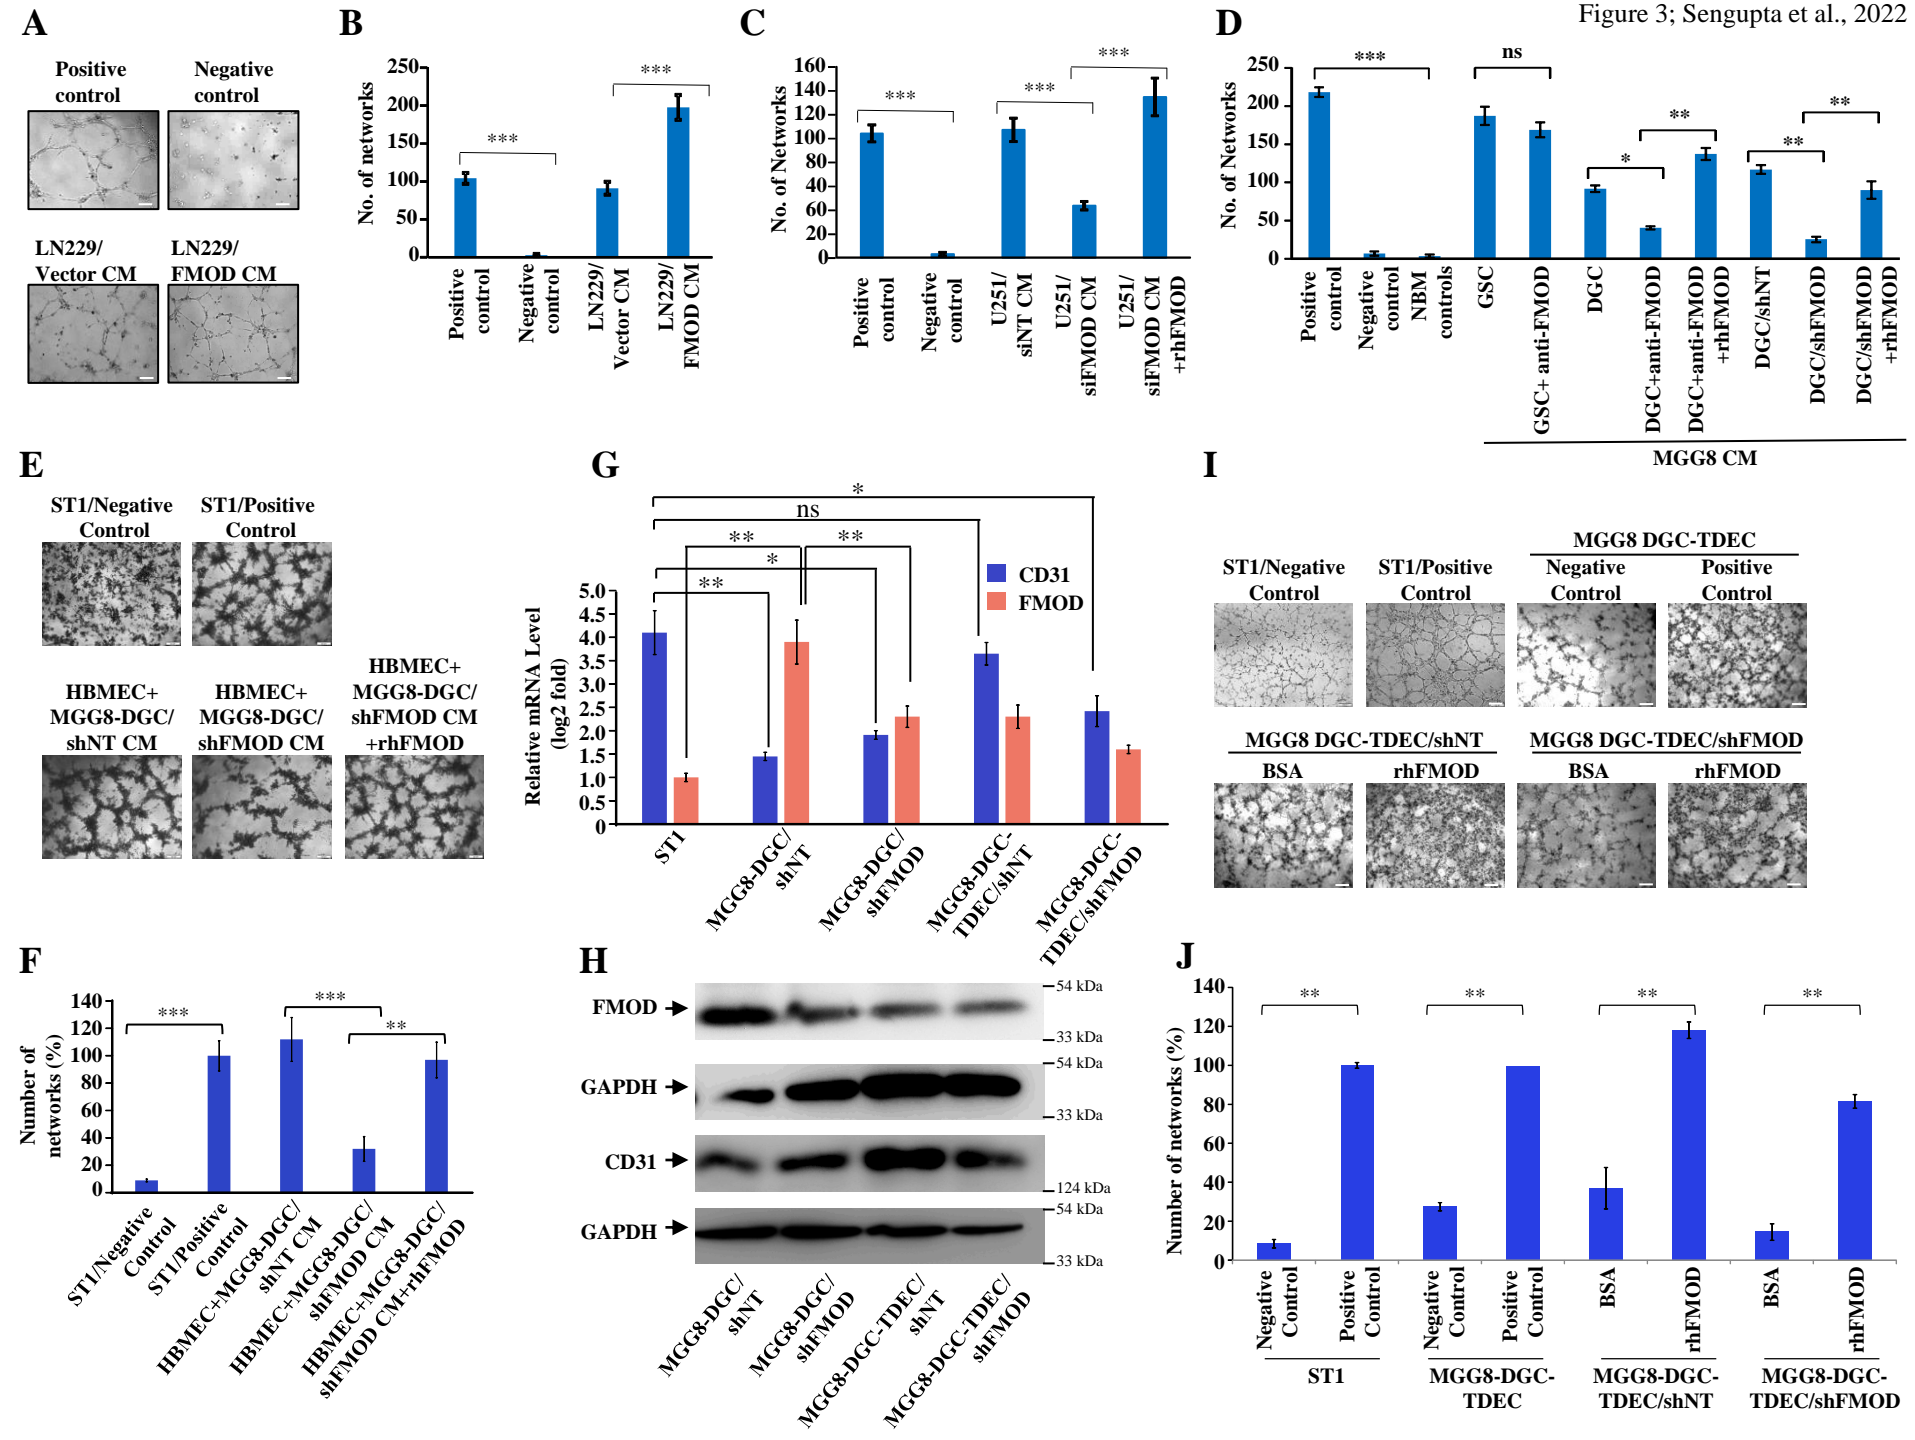



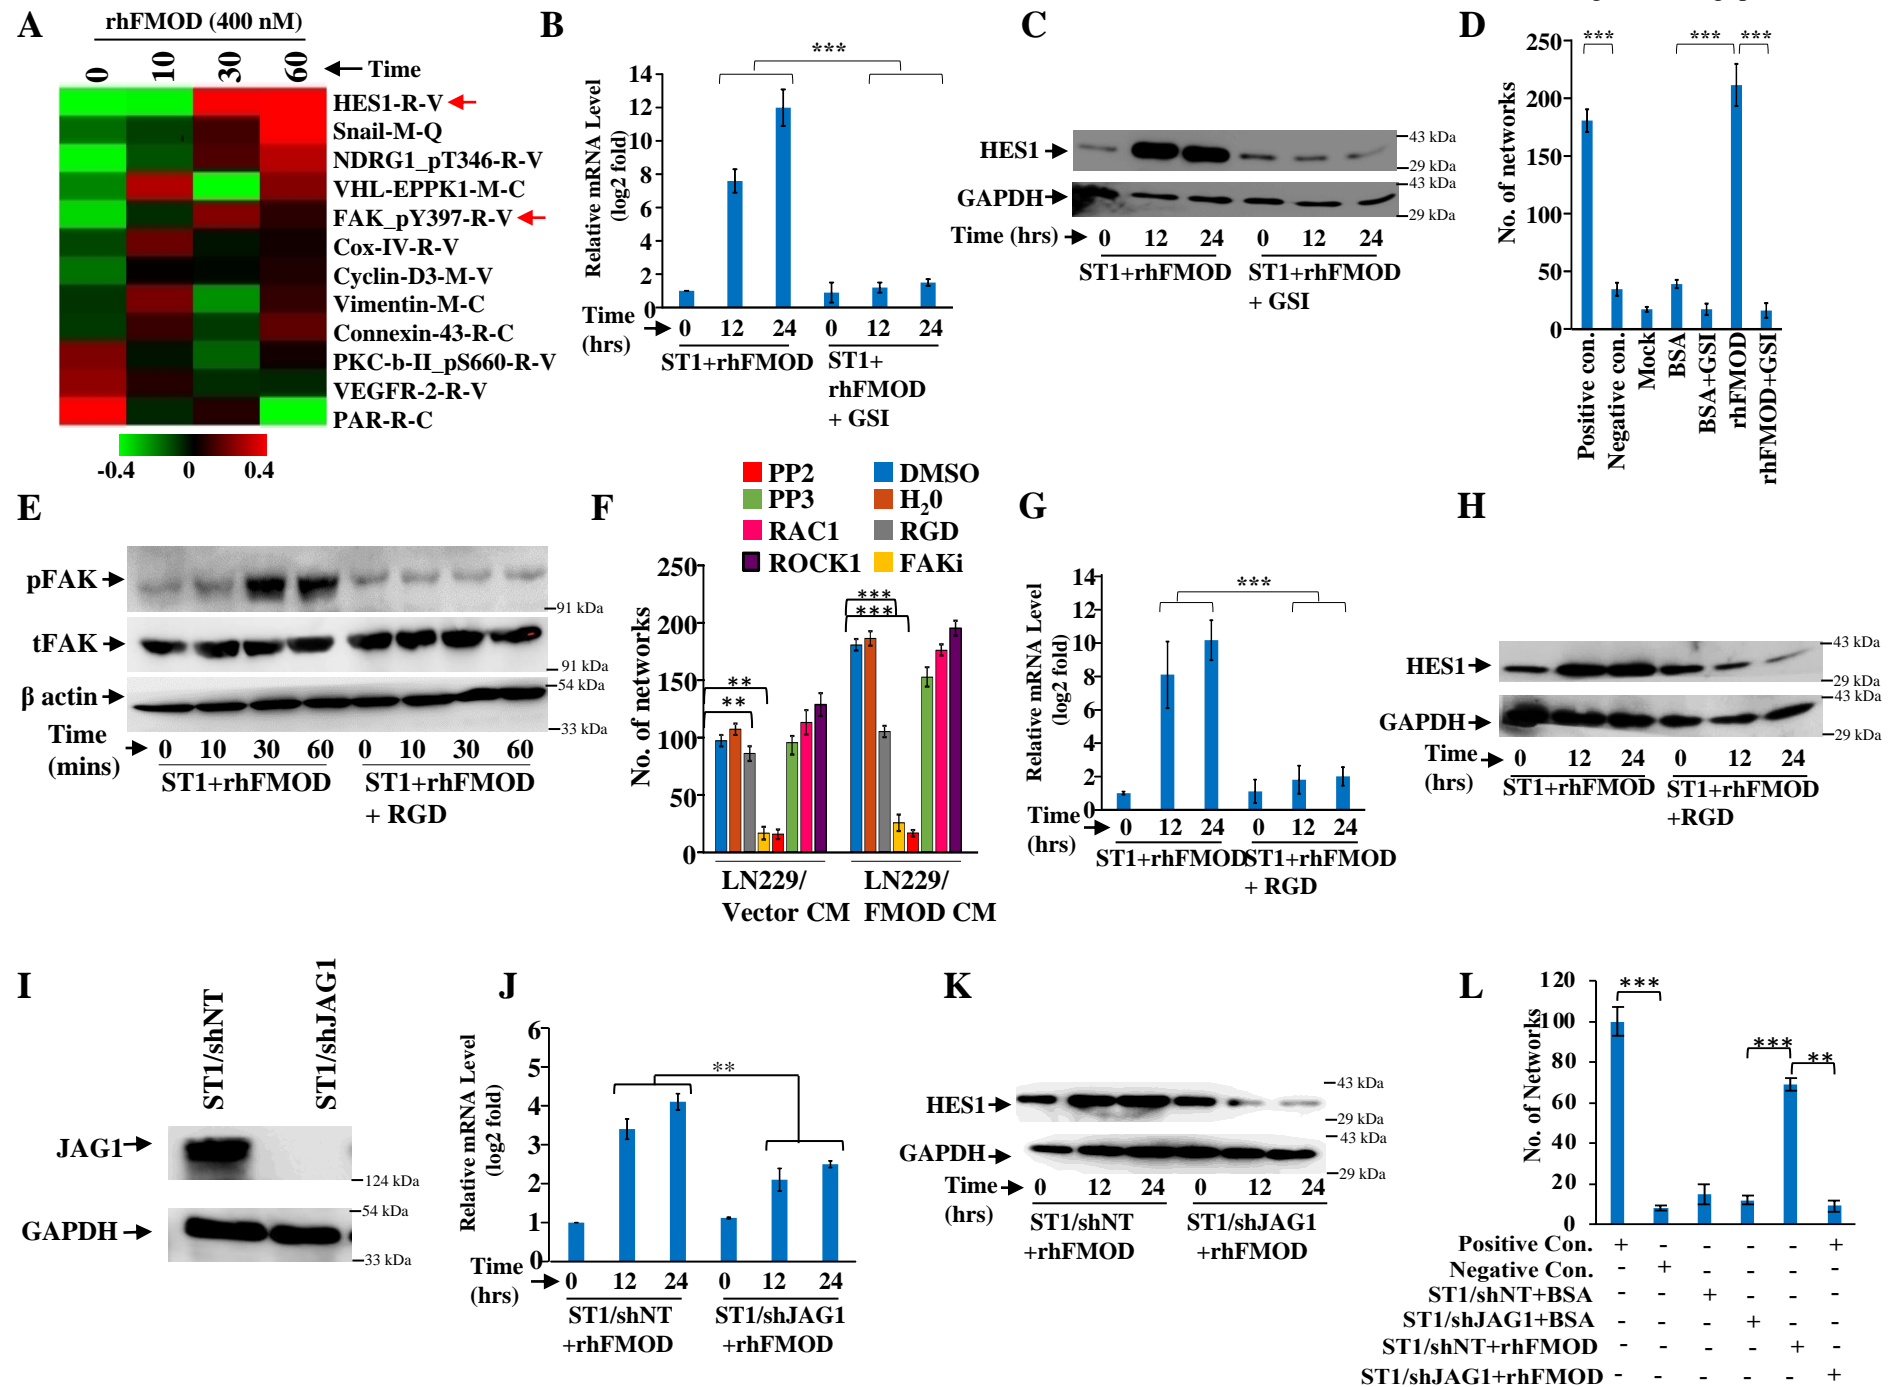

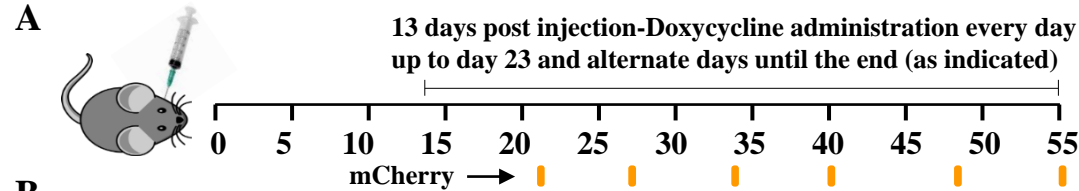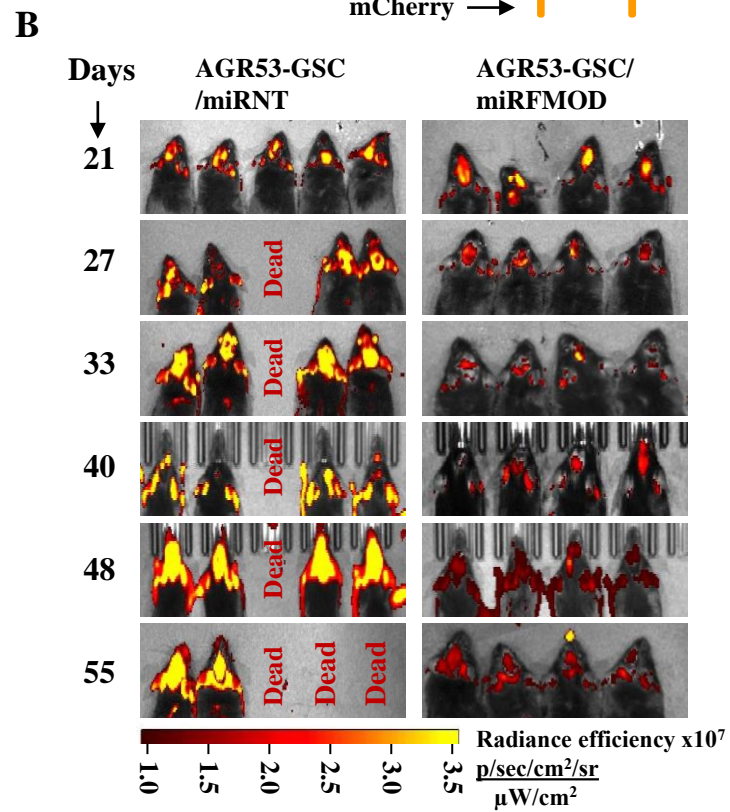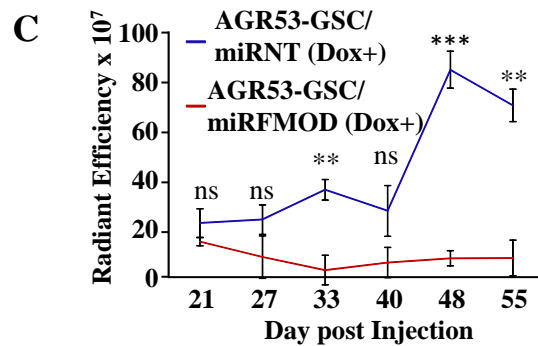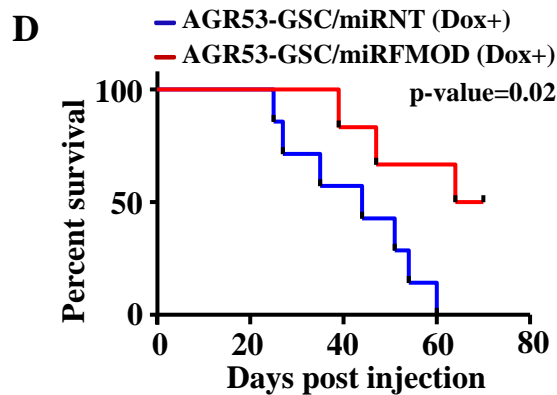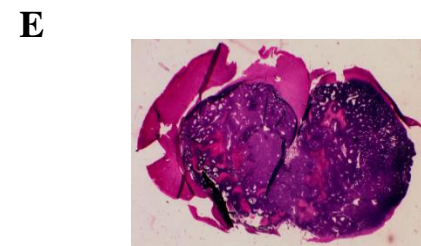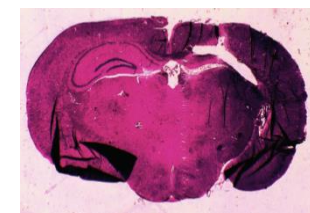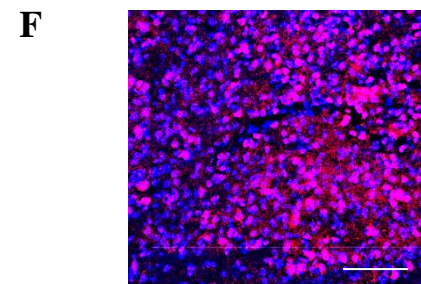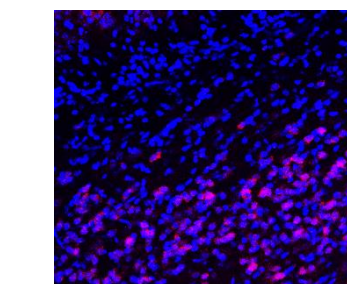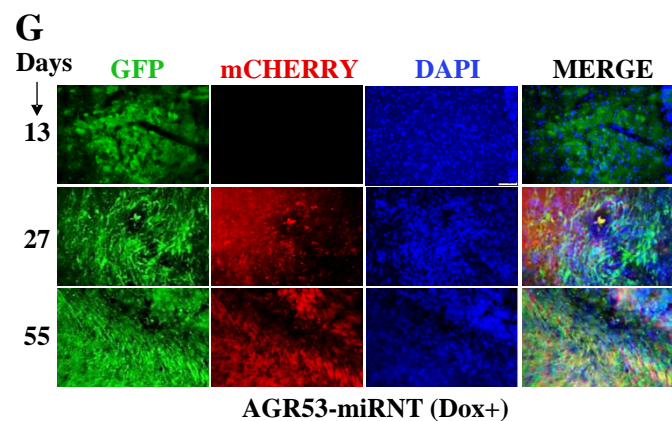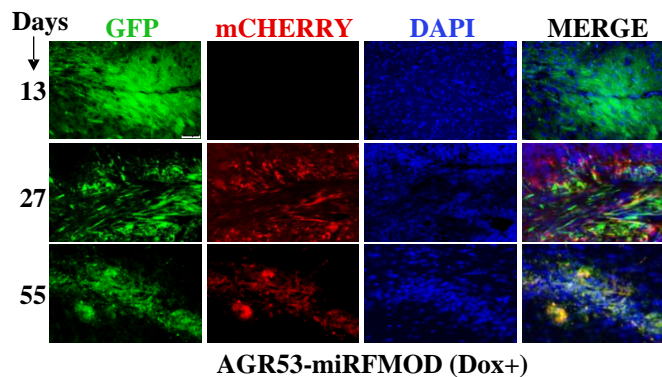

AGR53-GSC/miRFMOD (Dox+)

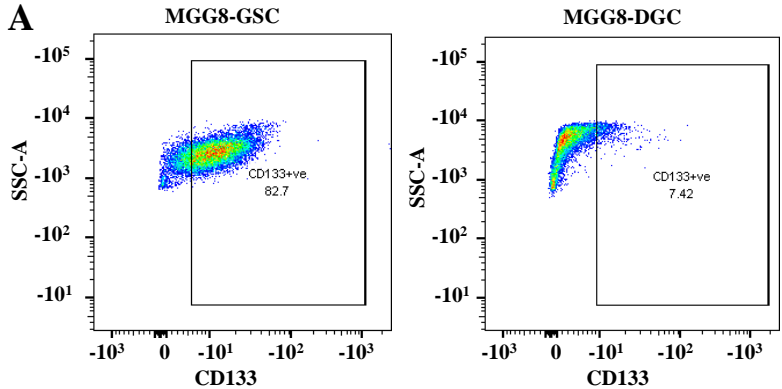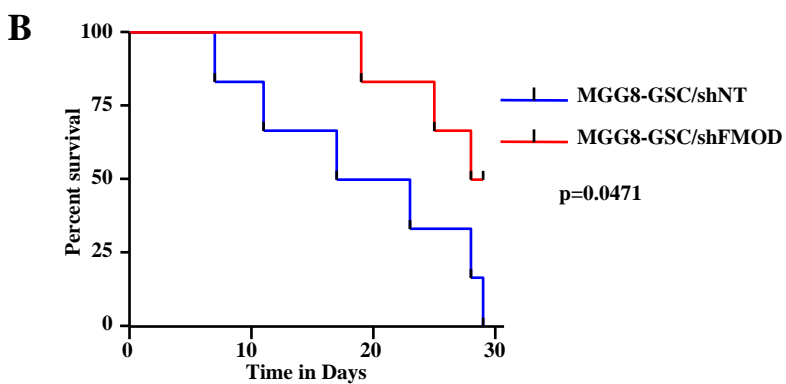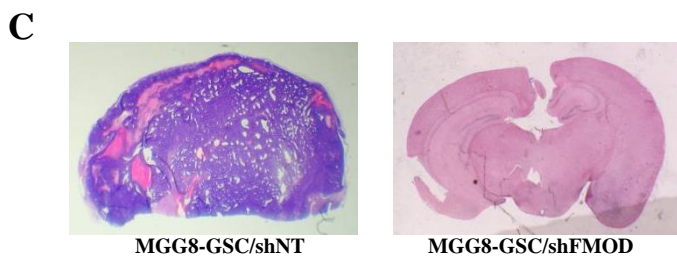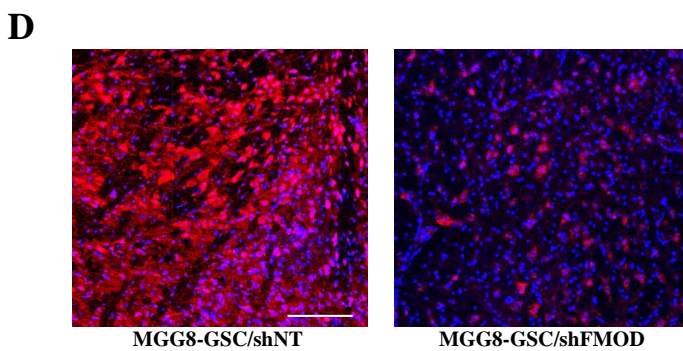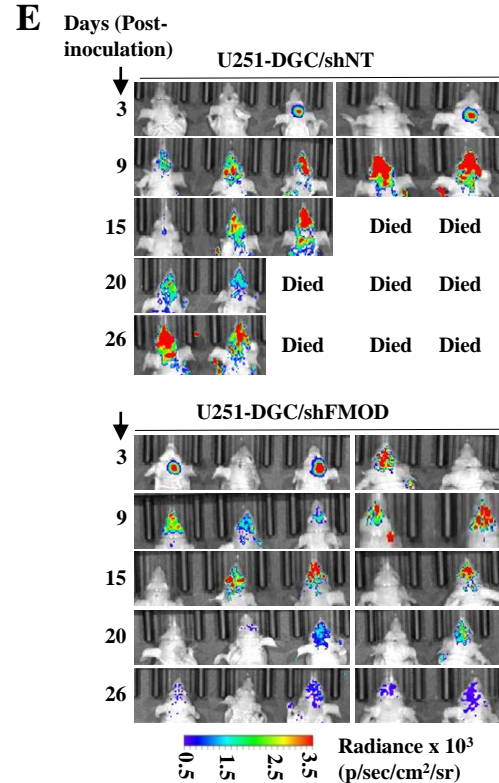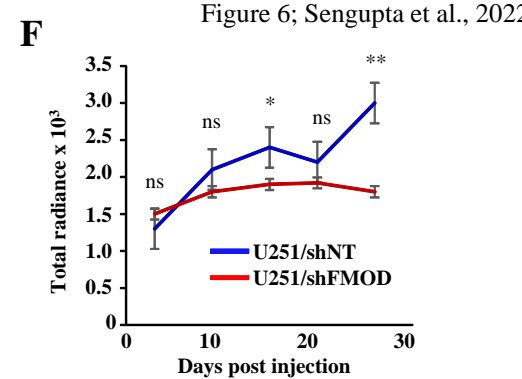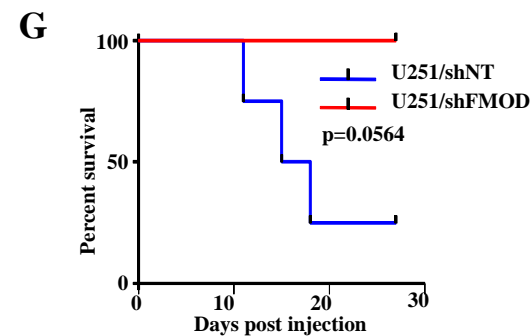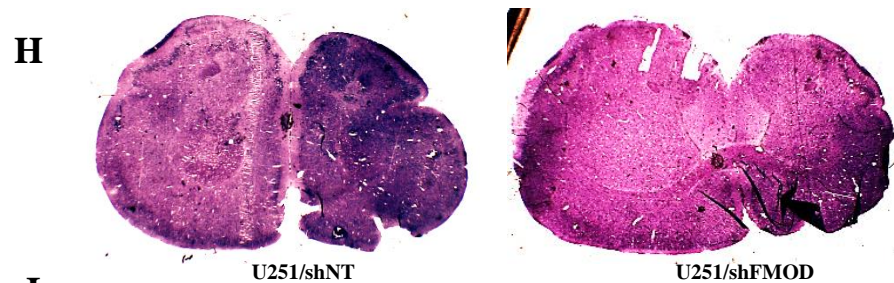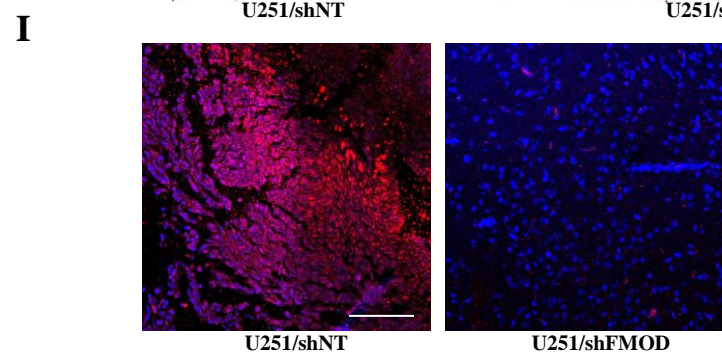



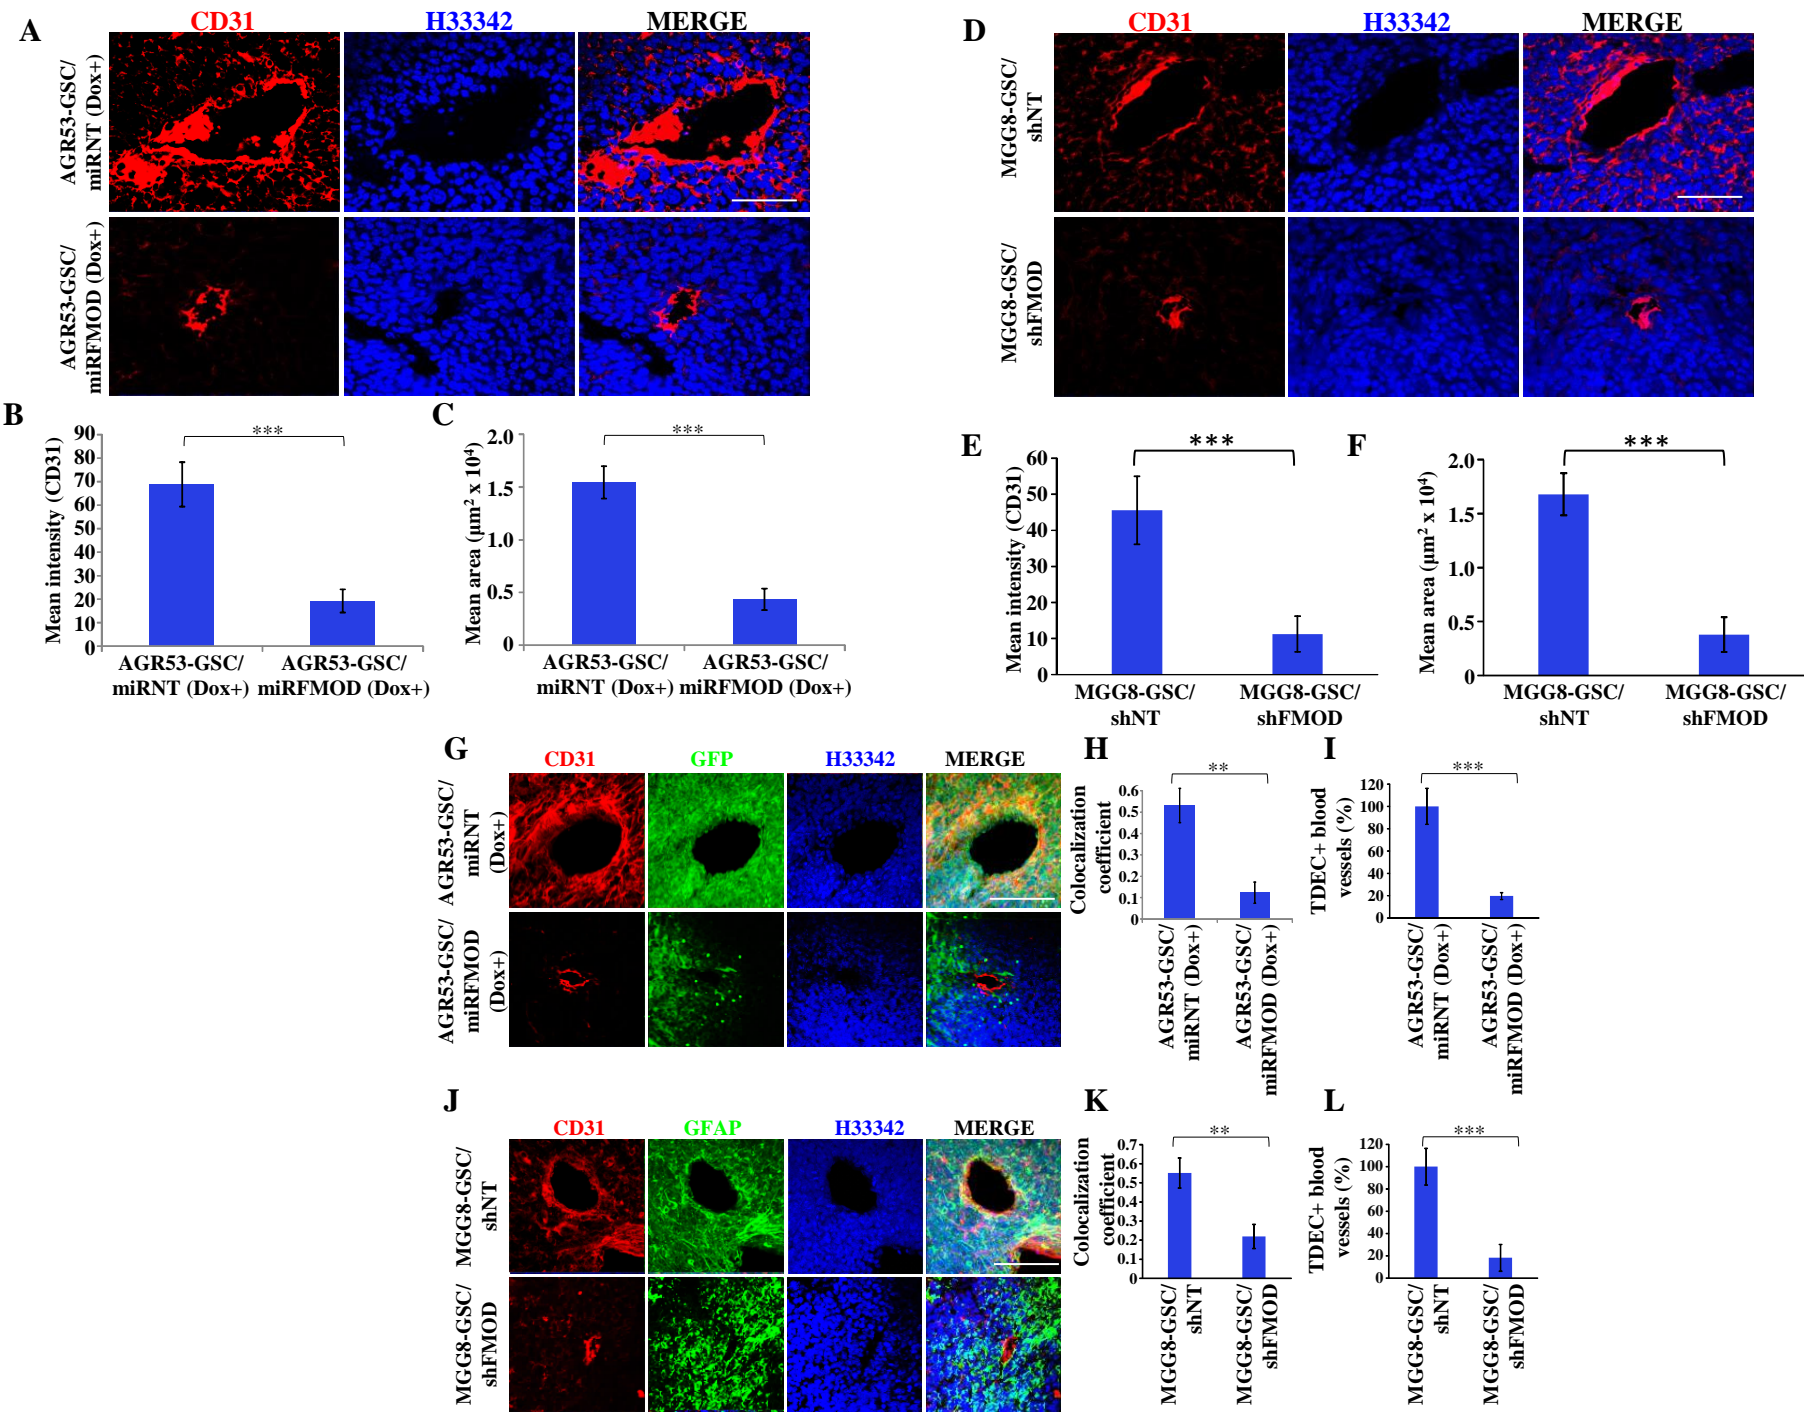

Sengupta et al., 2022

## Supplementary information

### The role of FMOD on GSC, DGC growth, and their plasticity *in vitro*

Before studying the importance of DGC secreted FMOD on tumor growth, we decided to investigate its requirement for the GSC, DGC growth, and their plasticity to form the other type. We have earlier shown that FMOD is not required for the proliferation of established glioma cell lines (**Mondal et al., 2017**). We used two human glioma cell lines- MGG8 and U251, two murine glioma cell lines-AGR53 (**Angel et al., 2020**), and DBT-Luc (**Yun et al., 2007**).

MGG8 GSCs transduced with a small hairpin RNA targeting FMOD (MGG8 GSC/shFMOD) grew as neurospheres with equal efficiency as measured by neurosphere formation and limiting dilution assays and also differentiated to form DGCs as efficiently as control MGG8 GSCs transduced with non-targeting shRNA (MGG8 GSC/shNT) (**Supplementary figure 6A, B, C and D**). As expected, the differentiation was accompanied by the downregulation of glioma reprogramming factors in both MGG8 GSC/shNT and MGG8 GSC/shFMOD cells (**Supplementary figure 6E**). Concordance with human GSCs, we found a higher expression of FMOD in AGR53-DGCs than AGR53-GSCs. (**Supplementary figures 7A, B, and C**). To silence the expression of FMOD in AGR53-DGC, we used a doxycycline-inducible FMOD shRNA (miRFMOD) construct that contains an inducible mCherry-shRNA cassette downstream of the Tet-responsive element (**Angel et al., 2020; Figure 2A**). Efficient silencing of FMOD in doxycycline-treated AGR53-DGC/miRFMOD cells was observed compared to AGR53-DGC/miRNT cells (**Supplementary figure 7D and E**). Next, we investigated the impact of FMOD silencing on AGR53-GSC growth and differentiation to DGCs *in vitro*. Like human GSCs, AGR53-GSC/miRNT and AGR53-GSC/miRFMOD grew as neurospheres with equal efficiency both in the absence and presence of doxycycline (**Supplementary figure 8A**). Further, both AGR53-GSC/miRNT and AGR53-GSC/miRFMOD differentiated efficiently to grow as a monolayer (**Supplementary figure 8C**). The differentiation resulted in the significant upregulation of astrocytic markers (**Supplementary figures 8D**). These results confirm that FMOD is overexpressed in both human and murine DGCs but is not required for GSC growth and their differentiation to DGCs.

Sengupta et al., 2022

To study the role of FMOD on reprogramming of DGCs to form GSCs, AGR53-DGC and DBT-Luc DGC were tested for their ability to reprogram. DBT-Luc is a luciferase-expressing glioblastoma-derived cell line, which grows as a differentiated monolayer (referred here onward as DBT-Luc-DGC) in FBS containing medium (37). AGR53-DGC/miRNT and AGR53-DGC/miRFMOD (both in the absence and presence of doxycycline) cells grow as a monolayer efficiently and reprogrammed to form neurospheres (**Supplementary figure 9A**). The reprogramming resulted in the significant upregulation of stem cell markers (**Supplementary figures 9B**). Similarly, DBT-Luc-DGC could readily reprogram to form DBT-Luc neurospheres (DBT-Luc-GSC; data not shown) with concomitant upregulation of stem cell markers and downregulation of astrocyte markers (**Supplementary figure 10A and B**). DBT-Luc-DGCs expressed higher levels of FMOD transcript and protein compared to DBT-Luc-GSCs (**Supplementary figure 10C and D, respectively**). To silence the expression of FMOD in DBT-Luc-DGC, we used the doxycycline-inducible shFMOD (miRFMOD) construct as explained above (*Angel et al., 2020; Figure 2A*). The addition of doxycycline resulted in downregulation of FMOD transcript and protein in DBT-Luc-DGC/miRFMOD but not in DBT-Luc-DGC/miRNT cells (**Supplementary figure 10E and F**). As expected, both DBT-Luc-DGC/miRFMOD and DBT-Luc-DGC/miRNT cells showed mCherry expression after doxycycline treatment (**Supplementary figure 10G**). Both DBT-Luc-DGC/miRNT and DBT-Luc-DGC/miRFMOD (both in the absence and presence of doxycycline) cells reprogrammed to form neurospheres with equal efficiency (data not shown). We next explored the impact of FMOD silencing on the ability of U251 cells, an established human glioma cell line, to form neurospheres through reprogramming. U251 cells, which grow as differentiated monolayer cells (referred here as U251-DGC) in an FBS-containing medium, can reprogram and form neurospheres enriched in CD133 expression (*Tao et al., 2018*). Both U251-DGC/shNT and U251-DGC/shFMOD cells could reprogram with equal efficiency, as measured by neurosphere formation and limiting dilution assays (**Supplementary figure 11A, B, and C**). The neurospheres formed through reprogramming showed an upregulation of glioma reprogramming factors in U251-GSC/shNT and U251-GSC/shFMOD cells (**Supplementary figure 11D**). Collectively, these observations indicate that FMOD is not required for GSC or DGC growth and differentiation or reprogramming processes.



Sengupta et al., 2022

## Bioinformatics analysis of FMOD, HES1, and JAG1 transcript levels in GBM— classification, correlation, and prognosis.

The transcript data of FMOD, HES1, and JAG1 in different data sets were used for deriving 1) transcriptional upregulation in GBM over control brain, 2) survival prediction by Kaplan meier analysis, and 3) correlation between transcripts (see **Table below more detail**). We used a total of 1885 samples that included GBMs (n=1833) and control brain samples (n=52). Wherever, the data is not available (NA), the specific analysis is not carried out. A p value less than 0.05 is considered significant with \*\*\*\* as less than 0.0001, \*\*\* as less than 0.001, \*\* as less than 0.01 and \* as less than 0.05. The non significant data is denoted as “ns”. The data is shown in Supplementary Figure 21 and 22.

| S.No | Dataset         | Source   | Control | Survival Information | Control brain (n) | GBM samples (n) | FMOD: GBM vs Control |         | HES1: GBM vs Control |         | JAG1: GBM vs Control |         | FMOD survival Kaplan -Meier |                     | FMOD to HES1 correlation |          | FMOD to JAG1 correlation |          |
|------|-----------------|----------|---------|----------------------|-------------------|-----------------|----------------------|---------|----------------------|---------|----------------------|---------|-----------------------------|---------------------|--------------------------|----------|--------------------------|----------|
|      |                 |          |         |                      |                   |                 | log2 fold change     | p value | log2 fold change     | p value | log2 fold change     | p value | Hazard Ratio                | Low vs High p value | R value                  | p value  | R value                  | p value  |
| 1    | TCGA Affymetrix | TCGA     | Yes     | Yes                  | 10                | 528             | 6.87                 | < 0.000 | 8.98                 | < 0.000 | 8.64                 | < 0.000 | 1.40                        | 0.00                | 0.30                     | < 0.0001 | 0.08                     | 0.08     |
| 2    | TCGA Agilent    | TCGA     | Yes     | Yes                  | 10                | 489             | 1.42                 | 0.00    | 0.98                 | < 0.000 | 2.04                 | < 0.000 | 1.34                        | 0.00                | 0.36                     | < 0.0001 | 0.17                     | 0.00     |
| 3    | Gravendeel      | GSE16011 | Yes     | Yes                  | 8                 | 159             | 1.90                 | 0.00    | 1.42                 | 0.00    | 1.84                 | < 0.000 | 2.01                        | < 0.0001            | 0.35                     | < 0.0001 | 0.12                     | 0.15     |
| 4    | TCGA RNA Seq    | TCGA     | Yes     | Yes                  | 4                 | 156             | 2.91                 | 0.00    | 1.01                 | 0.01    | 2.32                 | < 0.000 | 1.31                        | 0.13                | 0.22                     | 0.01     | 0.05                     | 0.58     |
| 5    | CGGA RNA Seq    | CGGA     | Yes     | Yes                  | 20                | 105             | 12.94                | 0.01    | 9.62                 | 0.01    | NA                   |         | 2.25                        | 0.00                | 0.06                     | 0.58     | NA                       |          |
| 6    | Lee Y           | GSE13041 | No      | Yes                  | NA                | 191             | NA                   |         |                      |         |                      |         | 1.46                        | 0.01                | 0.36                     | < 0.0001 | 0.29                     | < 0.0001 |
| 7    | Oh              | GSE58401 | No      | No                   | NA                | 105             | NA                   |         |                      |         |                      |         | NA                          |                     | 0.33                     | 0.00     | 0.25                     | 0.01     |
| 8    | Bao             | GSE48865 | No      | No                   | NA                | 100             | NA                   |         |                      |         |                      |         | NA                          |                     | 0.57                     | < 0.0001 | 0.25                     | 0.01     |

For survival prediction based on the methylation status of FMOD promoter, the samples were divided into methylation high (above median  $\beta$  value) and low (below median  $\beta$  value) for two CpG IDs- cg03764585 and cg04704856, derived from TCGA and GSE48461 data sets. The data is presented in Supplementary Figure 22.

## Investigating Integrin heterodimeric subunits that are required in rhFMOD treated endothelial cells.

Integrins are a family of  $\alpha/\beta$  heterodimeric transmembrane adhesion receptors. To identify the integrin  $\alpha$  and  $\beta$  subunits that are involved in rhFMOD activation of integrin signaling in endothelial cells, we resorted to an unbiased approach where we analyzed the transcriptome data of microvessels isolated through laser capture microdissection (LCM) from human brain samples (Song et al., 2020, 10: 12358, Scientific Reports). The transcript abundance of all integrin subunits ( $\alpha$  subunits (n=19) and  $\beta$  subunits (n=13) are shown in the table below. Three integrin

Sengupta et al., 2022

subunits with maximum transcript abundance – ITGA6, ITGB1, and ITGAV, were chosen for testing. The ability of rhFMOD to induce pFAK levels in ST1 cells silenced for any of the above three integrins was investigated. The results show that all three integrins are essential for rhFMOD activation of integrin signaling in endothelial cells (**Supplementary figure 18**).

| <b>High abundant integrins in endothelial cells<sup>§</sup></b> |                  |                       |                       |                       |                    |
|-----------------------------------------------------------------|------------------|-----------------------|-----------------------|-----------------------|--------------------|
| <b>S. No.</b>                                                   | <b>Integrins</b> | <b>Microvessels 1</b> | <b>Microvessels 2</b> | <b>Microvessels 3</b> | <b>Average</b>     |
|                                                                 |                  | <b>FPKM (log2)</b>    |                       |                       | <b>FPKM (log2)</b> |
| 1                                                               | <b>ITGA6</b>     | 191                   | 68                    | 249                   | 169                |
| 2                                                               | <b>ITGB1</b>     | 78                    | 26                    | 151                   | 85                 |
| 3                                                               | <b>ITGAV</b>     | 57                    | 91                    | 61                    | 70                 |
| 4                                                               | ITGA7            | 23                    | 28                    | 76                    | 42                 |
| 5                                                               | ITGA1            | 30                    | 4                     | 79                    | 38                 |
| 6                                                               | ITGB8            | 19                    | 41                    | 15                    | 25                 |
| 7                                                               | ITGB5            | 39                    | 9                     | 21                    | 23                 |
| 8                                                               | ITGA5            | 13                    | 11                    | 38                    | 20                 |
| 9                                                               | ITGA10           | 11                    | 9                     | 40                    | 20                 |
| 10                                                              | ITGB1BP1         | 16                    | 7                     | 26                    | 16                 |
| 11                                                              | ITGA3            | 1                     | 15                    | 12                    | 9                  |
| 12                                                              | ITGA2            | 11                    | 4                     | 8                     | 8                  |
| 13                                                              | ITGA9            | 0                     | 18                    | 4                     | 7                  |
| 14                                                              | ITGB2            | 12                    | 6                     | 2                     | 7                  |
| 15                                                              | ITGB4            | 0                     | 6                     | 13                    | 7                  |
| 16                                                              | ITGB3BP          | 2                     | 0                     | 16                    | 6                  |
| 17                                                              | ITGAE            | 5                     | 1                     | 6                     | 4                  |
| 18                                                              | ITGB7            | 0                     | 0                     | 11                    | 4                  |
| 19                                                              | ITGB3            | 6                     | 0                     | 3                     | 3                  |
| 20                                                              | ITGA4            | 7                     | 0                     | 0                     | 2                  |
| 21                                                              | ITGAL            | 1                     | 0                     | 5                     | 2                  |
| 22                                                              | ITGA8            | 0                     | 1                     | 4                     | 2                  |
| 23                                                              | ITGAX            | 4                     | 0                     | 0                     | 1                  |
| 24                                                              | ITGAM            | 2                     | 0                     | 0                     | 1                  |
| 25                                                              | ITGA11           | 1                     | 0                     | 0                     | 0                  |
| 26                                                              | ITGB1BP2         | 0                     | 0                     | 1                     | 0                  |
| 27                                                              | ITGA2B           | 0                     | 0                     | 0                     | 0                  |
| 28                                                              | ITGBL1           | 0                     | 0                     | 0                     | 0                  |
| 29                                                              | ITGA9-AS1        | 0                     | 0                     | 0                     | 0                  |
| 30                                                              | ITGAD            | 0                     | 0                     | 0                     | 0                  |
| 31                                                              | ITGB2-AS1        | 0                     | 0                     | 0                     | 0                  |
| 32                                                              | ITGB6            | 0                     | 0                     | 0                     | 0                  |

Sengupta et al., 2022

## Supplementary figure legends

**Supplementary Figure 1: Gene ontology analysis of differentially abundant proteins in GSC and DGC CMs.** **A.** Gene Ontology (GO) analysis of proteins exhibiting higher abundance in the GSC CM. **B.** Gene Ontology (GO) analysis of proteins exhibiting higher abundance in DGC CM. Enrichment factor is calculated by  $-\log(q\text{-value})$ . The  $q$ -value is a modified Fisher exact  $p$ -value provided by the Uniprot Database for annotation, visualization, and integrated discovery enrichment analysis.

**Supplementary Figure 2: TGF- $\beta$  pathway is activated in DGCs over GSCs.** **A.** Gene Set Enrichment Analysis (GSEA) shows a negative enrichment of multiple TGF- $\beta$ -related gene sets in GSCs over DGCs, suggesting an activated TGF- $\beta$  signaling in the DGCs. All these gene sets have positive normalized enrichment score (NES) and significant FDR  $q$ -value and  $p$  value.

**Supplementary Figure 3: TGF- $\beta$  is activated in GBM over normal samples in multiple datasets.** Gene Set Enrichment Analysis (GSEA) shows the positive enrichment of multiple TGF- $\beta$ -related gene sets in GBM over normal in multiple publicly available datasets and darker to lighter red indicates highest to lowest normalized enrichment score (NES), while % and green indicates the significant gene sets.  $p$  value less than 0.05 is considered significant. NA indicates Not Available.

**Supplementary Figure 4: Mesenchymal gene expression signature and TGF- $\beta$  signaling pathway are enriched in DGCs.** Table indicating the subtypes of MGG4, MGG6, and MGG8 GSCs vs. DGCs (each in triplicates). The darkest red indicates the highest value for a subtype that is most enriched in that particular sample, with decreasing color intensity indicating the other lesser enriched subtypes in a gradual manner. The Table also indicates the enrichment of the TGF- $\beta$  hallmark gene set from MSigDb. The intensity of the red color indicates the varying enrichment scores, with darkest red depicting highest enrichment and gradual lighter colors indicating gradually decreasing enrichment scores.

**Supplementary Figure 5: FMOD expression and TGF- $\beta$  signaling activation are significantly higher in mesenchymal GBM over the other subtypes.** **A.** Box plots depicting significantly higher expression of FMOD in mesenchymal GBM samples over the other subtypes

Sengupta et al., 2022

in the TCGA Agilent dataset. **B.** Box plots depicting significantly higher enrichment of the TGF- $\beta$  hallmark gene set from MSigDb in mesenchymal GBM samples over the other subtypes in the TCGA Agilent dataset. \*\*\*\* indicates the ANOVA p value for **A** and **B**. **C.** Bar diagram showing increased SBE-Luc activity indicating activated TGF- $\beta$  pathway in MGG8-DGCs, that is inhibited upon TGF- $\beta$  inhibitor treatment. **D.** Bar diagram showing increased FMOD promoter Luc activity in MGG8-DGCs, that is inhibited upon TGF- $\beta$  inhibitor treatment. p-value is calculated by unpaired t-test with Welch's correction are indicated. P-value less than 0.05 is considered significant with \*, \*\*, \*\*\* representing p-value less than 0.05, 0.01 and 0.001 respectively.

**Supplementary Figure 6: FMOD does not play a role in GSC neurosphere formation/maintenance and differentiation in human GSCs** **A.** Western blotting showing silencing of FMOD in MGG8-GSCs. **B.** Bar diagram, quantifying number of spheres, shows no significant difference in sphere formation of MGG8 GSCs between shNT and shFMOD conditions (spheres are divided into different sizes, 50-200 $\mu$ m<sup>2</sup>, 200-440 $\mu$ m<sup>2</sup>, and 400-800 $\mu$ m<sup>2</sup>). **C.** Limiting dilution assay shows no significant decrease (p=0.92) in the sphere-forming capacity of MGG8 GSCs between MGG8-GSC/shNT (black line) and MGG8-GSC/shFMOD (red line) conditions. **D.** Representative images showing MGG8-GSCs showing no difference in sphere formation and differentiation between shNT and shFMOD conditions. Magnification,=4X, Scale=200  $\mu$ m **E.** Real-time qPCR analysis shows that the four GSC reprogramming factors (OLIG2, SOX2, POU3F2, and SALL2) have similar less expression in both MGG8-DGC/shNT and MGG8-DGC/shFMOD (depicted by solid blue and solid red respectively), but undergo an expected similar significant increase in MGG8-GSC/shNT and MGG8-GSC/shFMOD cells (depicted by striped blue and striped red bars respectively). p values calculated by unpaired t test with Welch's correction are indicated. p value less than 0.05 is considered significant with \*, \*\*, \*\*\* representing p value less than 0.05, 0.01 and 0.001 respectively. ns stands for non-significant.

**Supplementary Figure 7: Difference in the level of FMOD expression between GSC and DGC of mouse glioma cell line AGR53 and confirmation of efficient conditional knockdown.** **A.** Real time qRT-PCR analysis showing significantly higher FMOD expression in AGR53-DGCs, compared with AGR53-GSCs. **B.** Western blotting showing FMOD is expressed

Sengupta et al., 2022

more at protein level intra-cellularly, in AGR53-DGCs, compared with AGR53-GSCs **C.** Western blotting showing FMOD is secreted more by AGR53-DGCs compared to AGR53-GSCs. Ponceau stained blot is used to ensure equal loading. **D.** Doxycycline addition induced FMOD knockdown at the mRNA level as well as at the **E.** protein level of AGR53-DGC/miRFMOD cells but not in the AGR53-DGC/miRNT cells. p value less than 0.05 is considered significant with \*, \*\*, \*\*\* representing p value less than 0.05, 0.01 and 0.001 respectively. ns stands for non-significant.

**Supplementary Figure 8: FMOD does not play a role in GSC neurosphere formation and differentiation in murine GSCs.** **A.** Bar diagram, quantifying number of spheres, shows no significant difference in sphere formation of AGR53-GSC/miRNT and AGR53-GSC/miRFMOD cells with or without doxycycline treatment. **B.** Limiting dilution assay shows no significant decrease ( $p=0.749$ ) in the sphere-forming capacity of AGR53-GSC/miRNT and AGR53-GSC/miRFMOD cells with or without doxycycline treatment. **C.** Representative images showing no difference in neurosphere formation and subsequent differentiation of AGR53-GSC/miRNT and AGR53-GSC/miRFMOD cells with or without doxycycline treatment. Scale= 10X, Magnification= 200  $\mu\text{m}$ . **D.** Real time qRT-PCR analysis showing that the addition of doxycycline did not hamper the differentiation potential of AGR53-GSC/miRNT and AGR53-GSC/miRFMOD cells with or without doxycycline treatment, as indicated by an upregulation of the astrocytic markers in all groups of cells. Embryonic Neuronal Stem Cells (ENSCs) were used as a negative control and astrocytes were used as a positive control. p values calculated by unpaired t test with Welch's correction are indicated. p value less than 0.05 is considered significant with \*, \*\*, \*\*\* representing p value less than 0.05, 0.01 and 0.001 respectively. ns stands for non-significant.

**Supplementary Figure 9: FMOD does not play a role in GSC differentiation and reprogramming of murine GSCs.** **A.** Representative images showing no difference in differentiation and subsequent neurosphere formation AGR53-DGC/miRNT and AGR53-DGC/miRFMOD cells with or without doxycycline treatment. Magnification=4X, Scale= 100  $\mu\text{m}$  **B.** Real-time qRT-PCR analysis showing that the addition of doxycycline did not hamper the neurosphere formation potential of AGR53-DGC/miRNT and AGR53-DGC/miRFMOD cells with or without doxycycline treatment, as indicated by an upregulation of the stem cell markers in all groups of cells. Embryonic Neuronal Stem Cells (ENSCs) were used as a positive control

Sengupta et al., 2022

and astrocytes were used as a negative control. p values calculated by unpaired t-test with Welch's correction are indicated. P-value less than 0.05 is considered significant with \*, \*\*, \*\*\* representing p-value less than 0.05, 0.01 and 0.001 respectively. ns stands for non-significant.

**Supplementary Figure 10: Validation of FMOD levels and knockdown in DBT-Luc mouse glioma cell-line.**

**A.** DBT-Luc cells were reprogrammed from DGCs to GSCs, and it was found that the mouse-stem-cell markers (MELK, NESTIN, BMI1, KLF4, TWIST2, PTGS2, and S100A6) were significantly upregulated in the DBT-Luc-GSCs, compared with the DBT-Luc-DGCs, at the mRNA level. **B.** It was also observed that the astrocytic markers (ASBG1, ALD1H1, GFAP, S100B) were significantly higher the mRNA level, in the DBT-Luc-DGCs compared with the DBT-Luc-GSCs. **C.** FMOD mRNA level was significantly higher in the DBT-Luc-DGCs compared with DBT-Luc-GSCs. **D.** FMOD protein level was also significantly higher in the DBT-Luc-DGCs compared to DBT-Luc-GSCs. **E.** Upon Doxycycline addition, a significant reduction in FMOD mRNA level was seen in DBT-Luc-DGC/miRFMOD (Dox+) group compared with DBT-Luc-DGC/miRFMOD (Dox-) group. No difference was seen in FMOD mRNA level between DBT Luc-DGC/miRNT (Dox-) and DBT-Luc-DGC/miRNT (Dox+) group of cells. **F.** Upon Doxycycline addition, a significant reduction in FMOD protein level was seen in DBT-Luc-DGC/miRFMOD(Dox+) group compared to DBT-Luc-DGC/miRFMOD(Dox-) group. No difference was seen in FMOD protein level between DBT-Luc-DGC/miRNT(Dox-) and DBT-Luc-DGC/miRNT(Dox+) group of cells. **G.** Upon Doxycycline addition, mCherry expression was seen in both DBT-Luc-DGC/miRNT and DBT-Luc-DGC/miRFMOD group of cells. Magnification- 4X, Scale- 200µm. p values calculated by unpaired t-test with Welch's correction are indicated. p-value less than 0.05 is considered significant with \*, \*\*, \*\*\* representing p-value less than 0.05, 0.01 and 0.001 respectively. ns stands for non-significant.

**Supplementary Figure 11: FMOD does not have a role in de-differentiation of DGCs to GSCs**

**A.** U251-DGC/shNT and U251-DGC/shFMOD cells show no difference in growth in DMEM, or in neurosphere formation, when plated in stem-cell media in ultra-low attachment plates. Magnification = 10X, Scale: 100µm. Bar diagram, quantified from **A**, shows that there is no significant decrease in sphere formation of U251 de-differentiated cells (U251/GSCs) between U251-GSC/shNT and U251-GSC/shFMOD conditions. **B.** Limiting dilution assay



Sengupta et al., 2022

shows no significant decrease ( $p=0.89$ ) in neurosphere forming capacity of U251 neurospheres between U251-GSC/shNT (black line) and U251-GSC/shFMOD (red line) conditions. **C.** Real-time qPCR analysis shows that the four GSC reprogramming factors (OLIG2, SOX2, POU3F2, and SALL2) have similar less expression in both U251-DGC/shNT and U251-DGC/shFMOD (depicted by solid blue and solid red respectively), but undergo an expected similar significant increase in U251-GSC/shNT and U251-GSC/shFMOD cells (depicted by striped blue and striped, red bars respectively).  $p$  values calculated by unpaired t-test with Welch's correction are indicated.  $P$ -value less than 0.05 is considered significant with \*, \*\*, \*\*\* representing  $p$ -value less than 0.05, 0.01 and 0.001 respectively. ns stands for non-significant.

**Supplementary Figure 12: Induction with doxycycline reduces FMOD level in DBT-GSC-Luc+DBT-DGC-Luc/miRFMOD(Dox+) tumors.** Western blot validating a decreased FMOD expression in tumors formed by co-injecting DBT-GSC-Luc cells with DBT-DGC-Luc/miRFMOD, upon doxycycline induction. Expression of FMOD was higher in all the other co-injection tumor groups (DBT-GSC-Luc+DBT-DGC-Luc/miRNT(Dox+), DBT-GSC-Luc+DBT-DGC-Luc/miRNT(Dox-), DBT-GSC-Luc+DBT-DGC-Luc/miRFMOD(Dox-)) and the DBT-Luc-DGC(Dox-) tumors, while it was low in the DBT-Luc-GSC(Dox-) tumor.

**Supplementary Figure 13: DGC-secreted FMOD induces angiogenesis by endothelial cells of various origins.** **A.** Representative images of the decrease in the number of networks formed by ST1 cells when treated with U251/siFMOD CM, compared with U251/siNT CM, which is rescued by the exogenous addition of rhFMOD. **B.** Representative images (left) and quantification (right) of the decrease in the number of networks formed by ST1 cells when treated with U251/shFMOD CM, compared with U251/shFMOD CM. **C.** Representative images (top) and quantification (bottom) of the number of networks formed by the ST1 cells **show** that the cells form significantly less networks when an FMOD neutralizing antibody is added, as compared to control antibody (IgG). BSA is used as a control for rhFMOD. **D.** Quantification of the number of networks formed in *in vitro* angiogenesis assay upon treatment of ST1 cells with the CM from MGG4, MGG6 and MGG8 GSCs and their corresponding DGCs. **E.** Representative images of the decrease in the number of networks formed by ST1 cells when treated with MGG8-DGC/siFMOD CM, compared with MGG8-DGC/siFMOD CM, which is rescued by the exogenous addition of rhFMOD(left). Quantification of the number of networks formed (right).  $p$  values calculated by unpaired t-test with Welch's correction are indicated.  $P$ -

Sengupta et al., 2022

value less than 0.05 is considered significant with \*, \*\*, \*\*\* representing p-value less than 0.05, 0.01 and 0.001 respectively.

**Supplementary Figure 14: FMOD enhances angiogenesis as well as the migration and invasion, but not the proliferation of endothelial cells.** **A.** Representative images (left) and quantification (right) from Boyden chamber assay showing increased migration of ST1 cells upon rhFMOD treatment over BSA. Magnification=10x scale=100µm. **B.** Representative images (left) and quantification (right) from Boyden chamber assay showing reduced migration of ST1 cells upon MGG8-DGC/shFMOD CM treatment compared with MGG8-DGC/shNT CM treatment. Magnification=10x scale=100µm. **C.** Representative images (left) and quantification (right) from Boyden chamber assay showing increased invasion of ST1 cells upon rhFMOD treatment over BSA. Magnification=10x scale=100µm. **D.** Representative images (left) and quantification (right) from Boyden chamber assay showing reduced invasion of ST1 cells upon MGG8-DGC/shFMOD CM treatment compared with MGG8-DGC/shNT CM treatment. Magnification=10x scale=100µm. **E.** MTT cell-proliferation assay shows no difference in the proliferation of ST1 cells treated with either BSA or rhFMOD, over a period of 96 hours. **F.** Representative images (top) and quantification (bottom) of the decrease in the number of networks formed by immortalized mouse brain-derived endothelial cells, B.End3, upon treatment with MGG8-DGC/shFMOD CM, compared with MGG8-DGC/shNT CM, which is rescued upon exogenous addition of rhFMOD. p values calculated by unpaired t-test with Welch's correction are indicated. P-value less than 0.05 is considered significant with \*, \*\*, \*\*\* representing p-value less than 0.05, 0.01 and 0.001 respectively. ns stands for non-significant.

**Supplementary Figure 15: FMOD induces GBM cells to undergo transdifferentiation.** **A.** Real-time qRT-PCR analysis showing the expression of CD31 (blue bars) and FMOD (orange bars) in ST1 cells and U87 cells, before and after transdifferentiation (TDECs represent the transdifferentiated cells). **B.** Western blotting showing the expression of FMOD (top) and CD31 (bottom) in U87 cells, before and after transdifferentiation (TDECs represent the transdifferentiated cells). **C.** Representative images of *in vitro* network formation by U87 and U87 TDECs upon BSA and rhFMOD treatments. Magnification 10X, Scale bar = 100 µm. **D.** Quantification of the number of complete networks formed in **C.** p-value is calculated by unpaired t-test with Welch's correction are indicated. P-value less than 0.05 is considered

Sengupta et al., 2022

significant with \*, \*\*, \*\*\* representing p value less than 0.05, 0.01 and 0.001 respectively. ns stands for non-significant.

**Supplementary Figure 16: FMOD induces activation of Notch signaling in endothelial cells.**

**A.** rhFMOD induces a significant increase in CSL Luc (Notch pathway-dependent reporter luciferase construct) activity in ST1 cells, an effect reduced by cell pretreatment with  $\gamma$ -secretase inhibitor (GSI, 10 $\mu$ M), a Notch pathway inhibitor. **B.** rhFMOD induces a significant increase in HES Luc activity (Notch pathway-dependent reporter (HES1 promoter) luciferase construct), which is reduced when ST1 cells are pre-treated with GSI. **C.** Western blotting showing a time-dependent translocation of the Notch intracellular domain (NICD) from the cytoplasm to the nucleus in ST1 cells, upon treatment with rhFMOD. Histone H3 was used as a nuclear loading control, GAPDH as a cytoplasmic loading control. **D.** Immunocytochemical analysis showing that rhFMOD treatment of endothelial cells causes translocation of NICD from the cytoplasm to the nucleus in a time-dependent manner. BSA is used as a control. Magnification = 40X, Scale bar= 50 $\mu$ m. **E.** rhFMOD-mediated increase in the reporter-luciferase activity of CSL Luc significantly decreases in ST1 endothelial cells pre-treated with the RGD peptide. **F.** rhFMOD-mediated increase in the reporter-luciferase activity of HES Luc significantly decreases in ST1 cells pre-treated with the RGD peptide. p-value is calculated by unpaired t-test with Welch's correction are indicated. P-value less than 0.05 is considered significant with \*, \*\*, \*\*\* representing p-value less than 0.05, 0.01 and 0.001 respectively. ns stands for non-significant.

**Supplementary Figure 17: ST1 cells stably expressing NICD are independent of FMOD in forming angiogenic networks.**

**A.** Western blotting confirming the overexpression of NICD in ST1 cells. **B.** Immunocytochemistry analysis confirming the overexpression of NICD in ST1 cells. **C.** Representative images of network formation by control and NICD overexpressed ST1 cells in the presence of BSA and rhFMOD. Magnification = 63x, Scale=20  $\mu$ m. **D.** Quantification of the number of networks formed in **C.** p-values calculated by unpaired t-test with Welch's correction are indicated. P-value less than 0.05 is considered significant with \*, \*\*, \*\*\* representing p-value less than 0.05, 0.01 and 0.001, respectively. ns stands for non-significant.

**Supplementary Figure 18: FMOD-Type I collagen interaction is crucial for FMOD-mediated activation of downstream signaling pathways.** **A.** Bar diagram showing that

Sengupta et al., 2022

rhFMOD cannot activate Notch-dependent reporter luciferase activity of CSL Luc in ST1 cells in the presence of WT peptide but can do so in the presence of mutant peptide. **B.** Bar diagram showing that rhFMOD cannot activate Notch-dependent reporter luciferase activity of HES Luc in ST1 cells in the presence of WT peptide but can do so in the presence of mutant peptide. **C.** Bar diagram quantifying the number of networks formed in *in vitro* angiogenesis assay shows that the WT (wild-type) peptide competes with rhFMOD to bind to Type I Collagen, whereas the mutant peptide cannot. Hence, rhFMOD induces more angiogenesis in the presence of the mutant peptide, as Type I Collagen is free for it to bind. However, because of the competition with the WT peptide, rhFMOD less efficiently induces angiogenesis in endothelial cells. **D.** Western blotting shows reduced induction in pFAK levels in rhFMOD-treated ST1/shITGB1 cells compared with the rhFMOD-treated ST1/shNT cells, where pFAK levels increase at 30 and 60 mins, while total FAK remains constant in both the cases. **E.** Western blotting shows reduced induction in pFAK levels in rhFMOD-treated ST1/shITGAV cells compared with the rhFMOD-treated ST1/shNT cells, where pFAK levels increase at 30 and 60 mins, while total FAK remains constant in both the cases. **F.** Western blotting shows reduced induction in pFAK levels in rhFMOD-treated ST1/shITGA6 cells compared with the rhFMOD-treated ST1/shNT cells, where pFAK levels increase at 30 and 60 mins, while total FAK remains constant in both the cases. **G.** Western blotting showing knockdown of ITGB1 in shITGB1 transduced ST1 cells compared with ST1/shNT cells. **H.** Western blotting showing knockdown of ITGAV in shITGAV transduced ST1 cells compared with ST1/shNT cells. **I.** Western blotting showing knockdown of ITGA6 in shITGA6 transduced ST1 cells compared with ST1/shNT cells. p values calculated by unpaired t test with Welch's correction are indicated. p value less than 0.05 is considered significant with \*, \*\*, \*\*\* representing p value less than 0.05, 0.01 and 0.001 respectively. ns stands for non-significant.

**Supplementary Figure 19: FMOD-mediated activation of Integrin-dependent Notch signaling in endothelial cells involve the integrin pathway downstream molecules FAK and Src.**

**A.** Bar diagram showing that rhFMOD cannot activate Notch dependent reporter luciferase activity of CSL Luc in ST1 cells pre-treated with FAK inhibitor. **B.** Bar diagram showing that rhFMOD cannot activate Notch dependent reporter luciferase activity of HES Luc in ST1 cells pre-treated with FAK inhibitor. **C.** Bar diagram showing that rhFMOD cannot activate Notch dependent reporter luciferase activity of CSL Luc in ST1 cells pre-treated with the specific Src

Sengupta et al., 2022

inhibitor PP2, but not when treated with the inactive structural analog, PP3. **D.** Bar diagram showing that rhFMOD cannot activate Notch dependent reporter luciferase activity of HES Luc in ST1 cells pre-treated with the specific Src inhibitor PP2, but not when treated with the inactive structural analog, PP3. **E.** Real-time qRT-PCR analysis shows that rhFMOD treatment of ST1 cells cause a time-dependent increase in HES1 mRNA which is inhibited in cells pre-treated with FAK inhibitor. **F.** Western blotting showing that rhFMOD treatment of ST1 cells cause a time-dependent increase in HES1 protein which is inhibited in cells pre-treated with FAK inhibitor. **G.** Real-time qRT-PCR analysis shows that rhFMOD treatment of ST1 cells cause a time-dependent increase in HES1 mRNA which is inhibited in cells pre-treated with the specific Src inhibitor PP2, but not when treated with the inactive structural analog, PP3. **H.** Western blotting showing that rhFMOD treatment of ST1 cells cause a time-dependent increase in HES1 protein which is inhibited in cells pre-treated with the specific Src inhibitor PP2, but not when treated with the inactive structural analog, PP3. p value less than 0.05 is considered significant with \*, \*\*, \*\*\* representing p value less than 0.05, 0.01 and 0.001 respectively.

**Supplementary Figure 20: FMOD-mediated crosstalk of the integrin and Notch signaling pathways occurs via JAG1 upregulation.**

**A.** Real-time qRT-PCR analysis shows the rhFMOD-mediated increase in the mRNA levels of Notch ligands in a time-dependent manner. In cells that are pre-treated with RGD (10  $\mu$ M), the rhFMOD-mediated increase of JAG1 and DLL3 are significantly reduced. **B.** Real-time qRT-PCR analysis shows that rhFMOD treatment of ST1 cells causes a time-dependent increase in JAG1 mRNA which is inhibited in cells pre-treated with FAK inhibitor. **C.** Real-time qRT-PCR analysis shows that rhFMOD treatment of ST1 cells cause a time-dependent increase in JAG1 mRNA which is inhibited in cells pre-treated with the specific Src inhibitor PP2, but not when treated with the inactive structural analog, PP3. **D.** rhFMOD-mediated CSL-Luc reporter-luciferase activity is significantly decreased in ST1/shJAG1 cells compared with ST1/shNT cells. **E.** rhFMOD-mediated HES-Luc reporter-luciferase activity is significantly decreased in ST1/shJAG1 cells compared with ST1/shNT cells. **F.** Real-time qRT-PCR analysis shows that rhFMOD treatment of ST1 upregulates 2 out of a set of 5 TFs in ST1, of which the expression of KLF8 (blue bar) shows a significant inhibition when the cells are pre-treated with RDG. **G.** Western blotting showing knockdown of KLF8 in siKLF8 transfected ST1 cells compared with ST1/siNT cells. **H.** Western blotting showing that rhFMOD treatment of ST1 cells cause a time-dependent increase in JAG1 protein which is inhibited in

Sengupta et al., 2022

cells are silenced for KLF8. p value less than 0.05 is considered significant with \*, \*\*, \*\*\* representing p value less than 0.05, 0.01 and 0.001 respectively. ns stands for non-significant.

**Supplementary Figure 21: Clinical relevance of the FMOD-JAG1-HES1 signaling.** **A.** FMOD is upregulated at the transcript level in GBM samples over normal samples across multiple publicly available datasets. **B.** HES1 is upregulated at the transcript level in GBM samples over normal samples across multiple publicly available datasets. **C.** JAG1 is upregulated at the transcript level in GBM samples over normal samples across multiple publicly available datasets. **D.** FMOD and HES1 mRNAs are significantly positively correlated across multiple publicly available datasets. **E.** FMOD and JAG1 mRNAs are significantly positively correlated across multiple publicly available datasets.

**Supplementary Figure 22: Clinical relevance of the FMOD-JAG1-HES1 signaling.** **A.** High FMOD mRNA levels in patients show poorer survival than low FMOD patients, in multiple publicly available datasets. **B.** FMOD promoter hypomethylation (in CpGs cg03764585 and cg04704856) in patients show poorer survival than low patients with FMOD promoter hypermethylation, in multiple publicly available datasets.

**Supplementary Figure 23: Conditional silencing of FMOD in DGCs formed *de novo* by GSC-initiated tumors inhibits tumor growth.** **A.** *In vivo* fluorescent imaging of mice injected with either DBT-Luc-GSC/miRNT or DBT-Luc-GSC/miRFMOD cells. **B.** Haematoxylin and Eosin staining shows a larger tumor (depicted by dark blue color due to extremely high cellular density) in mice brain injected with DBT-Luc-GSC/miRFMOD (Dox-), but not in DBT-Luc-GSC/miRFMOD (Dox+) cells. **C.** Kaplan-Meier survival graphs showing the survival of mice injected with DBT-Luc-GSC/miRFMOD(Dox-) or DBT-Luc-GSC/miRFMOD (Dox+) cells. **D.** Immunohistochemical analysis showing FMOD expression in brains of mice injected with DBT-Luc-GSC/miRFMOD(Dox-) or DBT-Luc-GSC/miRFMOD(Dox+) cells. Red represents FMOD and blue represents H33342. The merged images have been shown for representation. Magnification = 20x, Scale=100  $\mu$ m.

**Supplementary Figure 24: FMOD-silencing does not hamper the differentiation potential of tumor cells in murine glioma models.** **A.** Immunohistochemical analysis of brain-derived sections obtained from mice injected with AGR53-GSC/miRNT cell show FMOD, GFAP, and



Sengupta et al., 2022

CD133 expression, and co-localization of FMOD with GFAP, and not with CD133 (left, after doxycycline injection). **B.** Bar diagram quantifying mean fluorescence intensity of CD133 and GFAP in AGR53-GSC/miRNT cells after doxycycline injection. **C.** Bar diagram quantifying co-localization of FMOD with CD133 and GFAP, respectively, in AGR53-GSC/miRNT cells after doxycycline injection. **D.** Immunohistochemical analysis of brain-derived sections obtained from mice injected with AGR53-GSC/miFMOD cell show low FMOD, and high GFAP, and CD133 expression, and loss of co-localization of FMOD with GFAP (right, after doxycycline injection). **E.** Bar diagram quantifying mean fluorescence intensity of CD133 and GFAP in AGR53-GSC/miRFMOD cells after doxycycline injection. **F.** Bar diagram quantifying co-localization of FMOD with CD133 and GFAP, respectively, in AGR53-GSC/miRNT cells after doxycycline injection. Magnification for panels **A** and **D** =20 X, Scale= 100  $\mu$ m. p-values for panels **B**, **C**, **E**, and **F** are calculated by Student's t-test, p-value are represented by \*, \*\*, \*\*\* indicate values <0.05, <0.01, and <0.001 respectively.

**Supplementary Figure 25: FMOD-silencing does not hamper the differentiation potential of tumor cells in murine glioma models.** **A.** Immunohistochemical analysis of brain-derived sections obtained from mice injected with DBT-Luc-GSC/miRFMOD cell show FMOD, GFAP, and CD133 expression, and co-localization of FMOD with GFAP, and not with CD133 (left, before doxycycline injection). **B.** Bar diagram quantifying mean fluorescence intensity of CD133 and GFAP in DBT-Luc-GSC/miRFMOD cells without doxycycline injection. **C.** Bar diagram quantifying co-localization of FMOD with CD133 and GFAP, respectively, in DBT-Luc-GSC/miRFMOD cells before doxycycline injection. **D.** Immunohistochemical analysis of brain-derived sections obtained from mice injected with DBT-Luc-GSC/miRFMOD cell show low FMOD, and high GFAP, and CD133 expression, and loss of co-localization of FMOD with GFAP (right, with doxycycline injection). **E.** Bar diagram quantifying mean fluorescence intensity of CD133 and GFAP in DBT-Luc-GSC/miRFMOD cells after doxycycline injection. **F.** Bar diagram quantifying co-localization of FMOD with CD133 and GFAP, respectively, in DBT-Luc-GSC/miRFMOD cells after doxycycline injection. Magnification for panels **A** and **D** =20 X, Scale= 100  $\mu$ m. p-values for panels **B**, **C**, **E**, and **F** are calculated by Student's t-test, p-value are represented by \*, \*\*, \*\*\* indicate values <0.05, <0.01, and <0.001 respectively.

Sengupta et al., 2022

**Supplementary Figure 26: FMOD-silencing does not hamper the differentiation potential**

**of tumor cells. A.** Immunohistochemical analysis of brain-derived sections obtained from mice injected with MGG8-GSC/shNT cells show FMOD, GFAP, and CD133 expression, and co-localization of FMOD with GFAP, and not with CD133 (left). **B.** Bar diagram quantifying mean fluorescence intensity of CD133 and GFAP in MGG8-GSC/shNT cells. **C.** Bar diagram quantifying co-localization of FMOD with CD133 and GFAP, respectively, in MGG8-GSC/shNT cells. **D.** Immunohistochemical analysis of brain-derived sections obtained from mice injected with MGG8-GSC/shFMOD cells show low FMOD, and high GFAP, and CD133 expression, and loss of co-localization of FMOD with GFAP (right, after doxycycline injection). **E.** Bar diagram quantifying mean fluorescence intensity of CD133 and GFAP in MGG8-GSC/shFMOD cells. **F.** Bar diagram quantifying co-localization of FMOD with CD133 and GFAP, respectively, in MGG8-GSC/shFMOD cells. Magnification for panels **A** and **D** =20 X, Scale= 100  $\mu$ m. p-values for panels **B**, **C**, **E**, and **F** are calculated by Student's t-test, p-value are represented by \*, \*\*, \*\*\* indicate values <0.05, <0.01, and <0.001 respectively.

**Supplementary Figure 27: FMOD-silencing affects angiogenesis and vascular mimicry *in vivo*.**

**A.** Immunohistochemical analysis shows that the expression of von Willebrand Factor (vWF), a blood vessel marker, lining the blood vessels in both AGR53-GSC/miRNT and AGR53-GSC/miRFMOD groups, after doxycycline injection. Brain sections of two time points, day21 and day 55 were stained for the expression of vWF. At both time points, AGR53-GSC/miRFMOD shows lesser vWF staining than the AGR53-GSC/miRNT group. Magnification=20x, Scale= 100  $\mu$ m. **B.** Bar diagram showing the mean intensity of vWF and **C.** The mean area of blood vessels in the AGR53-GSC/miRNT and AGR53-GSC/miRFMOD groups. **D.** Immunohistochemical analysis shows that the expression of CD31, lining the blood vessels in both DBT-Luc-GSC/miRFMOD(Dox-) and DBT-Luc-GSC/miRFMOD(Dox+) groups. **E.** Bar diagram showing the mean intensity of vWF and **F.** The mean area of blood vessels in the DBT-Luc-GSC/miRFMOD(Dox-) and DBT-Luc-GSC/miRFMOD(Dox+) groups. **G.** Immunohistochemical analysis showing overlap of CD31 (red) and GFP (green) expression in brains of mice injected with both DBT-Luc-GSC/miRFMOD cells, with or without doxycycline injection. Yellow allow indicates the region depicting the colocalization of both the two markers. **H.** Quantification of the colocalization coefficient in both DBT-Luc-GSC/miRFMOD(Dox-) and DBT-Luc-GSC/miRFMOD(Dox+) groups. **I.** Quantification of the VM+ blood vessels,



**Supplementary figures 1 to 12**

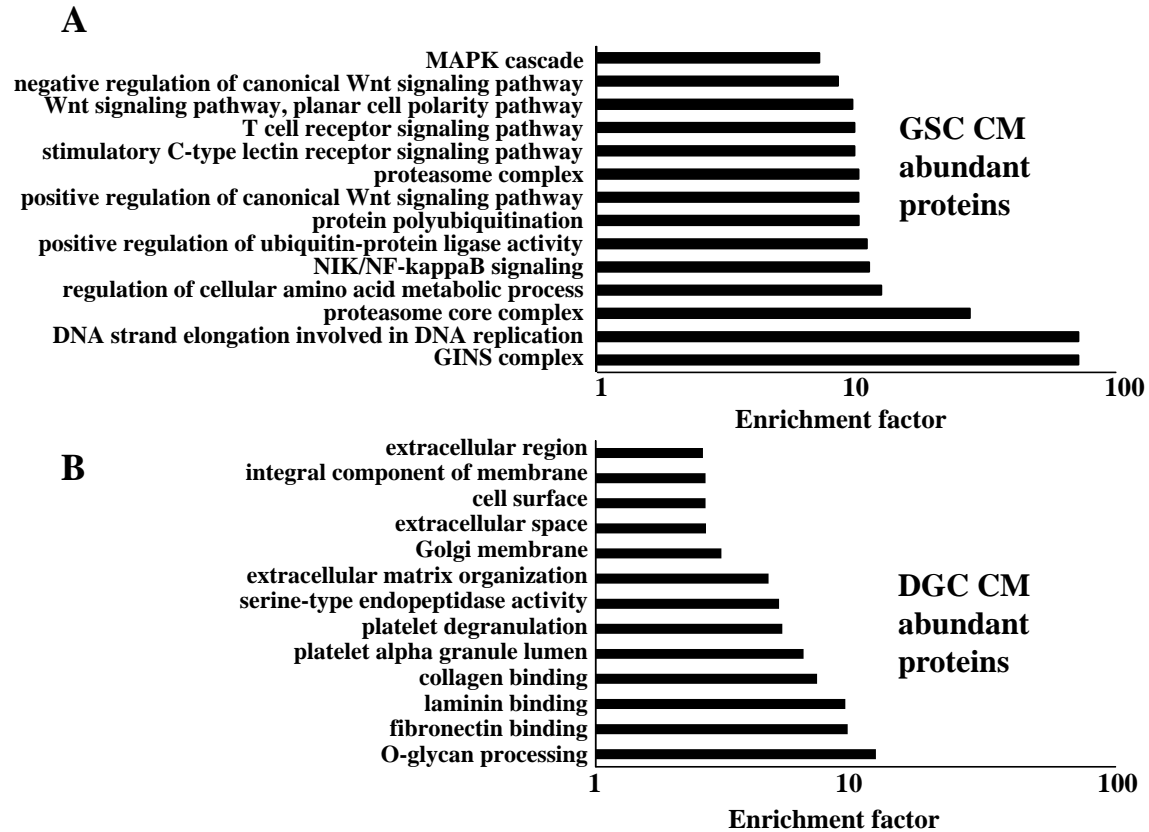

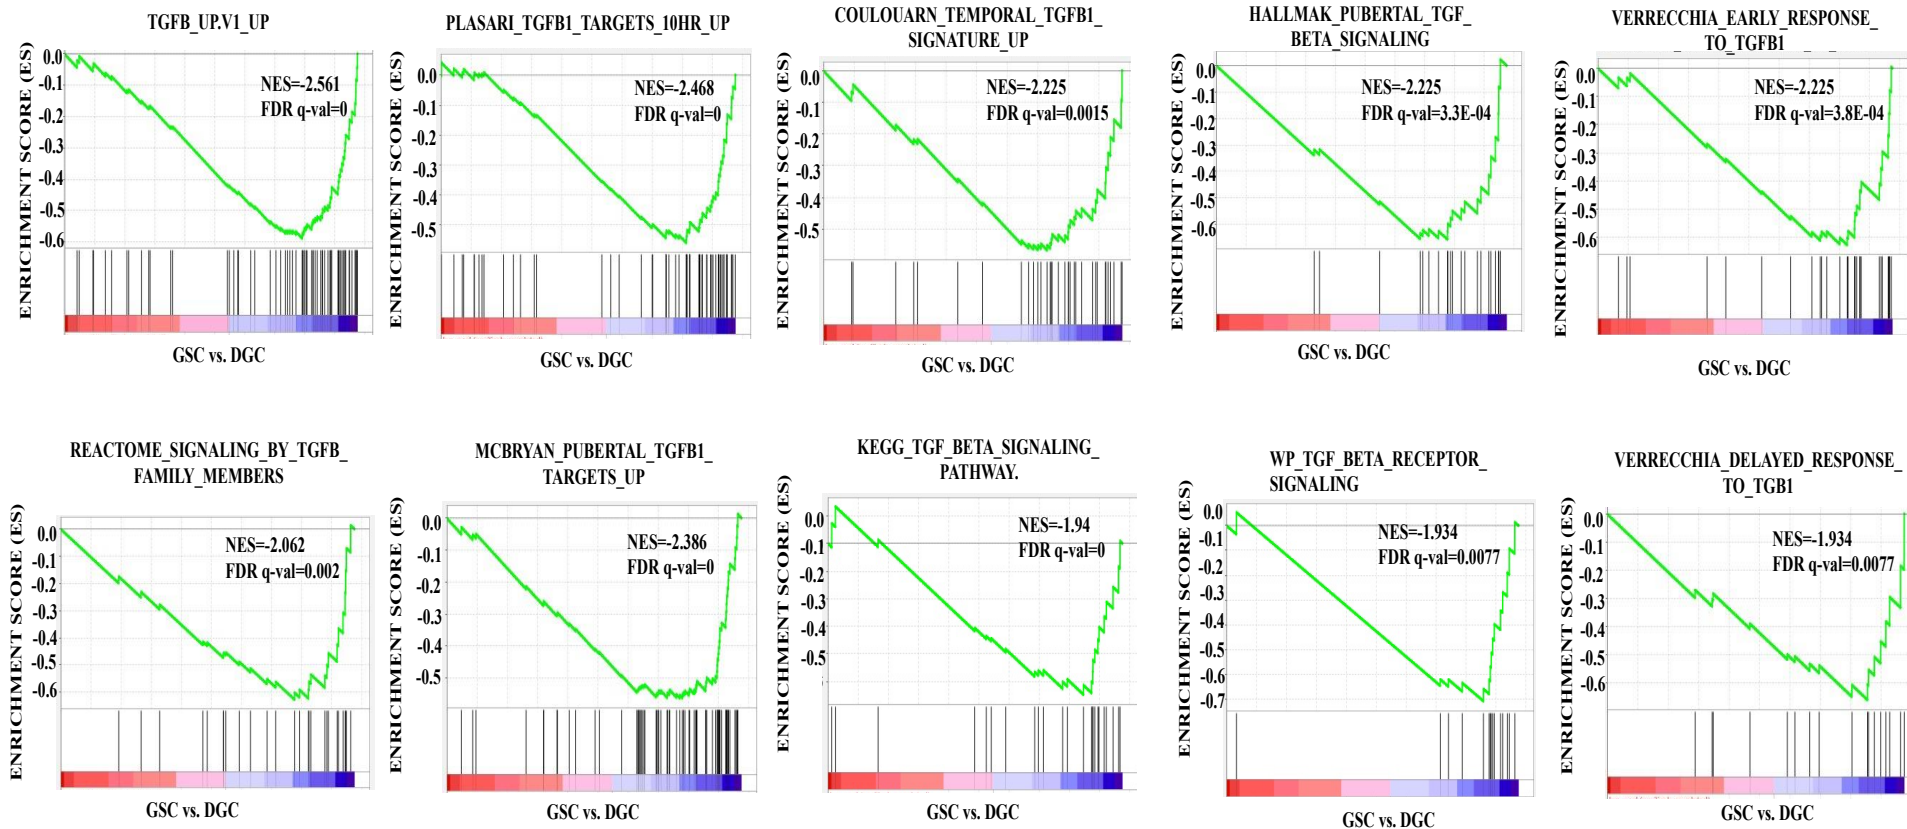



| TGF Beta signaling pathway gene sets <sup>#</sup> | Gill <sup>&amp;</sup> |                      | Gravendeel <sup>&amp;</sup> |                      | Grzmil <sup>&amp;</sup> |                      | TCGA_affymetrix <sup>&amp;</sup> |                      | TCGA_agilent <sup>&amp;</sup> |                      | TCGA_RNA Seq <sup>&amp;</sup> |                      |
|---------------------------------------------------|-----------------------|----------------------|-----------------------------|----------------------|-------------------------|----------------------|----------------------------------|----------------------|-------------------------------|----------------------|-------------------------------|----------------------|
|                                                   | NES <sup>*</sup>      | p-value <sup>%</sup> | NES <sup>*</sup>            | p-value <sup>%</sup> | NES <sup>*</sup>        | p-value <sup>%</sup> | NES <sup>*</sup>                 | p-value <sup>%</sup> | NES <sup>*</sup>              | p-value <sup>%</sup> | NES <sup>*</sup>              | p-value <sup>%</sup> |
| COULOUARN_TEMPORAL_TGFB1_SIGNATURE_UP             | 1.53                  | 0.02                 | 1.86                        | 0.00                 | 1.20                    | 0.25                 | 2.05                             | 0.00                 | 1.95                          | 0.00                 | 1.61                          | 0.01                 |
| HALLMARK_TGF_BETA_SIGNALING                       | 2.10                  | 0.00                 | 1.91                        | 0.00                 | NA                      | NA                   | 1.82                             | 0.02                 | 1.69                          | 0.01                 | 1.72                          | 0.02                 |
| KEGG_TGF_BETA_SIGNALING_PATHWAY                   | 1.46                  | 0.04                 | 1.94                        | 0.01                 | 1.36                    | 0.13                 | 1.80                             | 0.01                 | 1.62                          | 0.02                 | 1.16                          | 0.23                 |
| MCBRYAN_PUBERTAL_TGFB1_TARGETS_UP                 | 2.66                  | 0.00                 | 2.58                        | 0.00                 | 2.09                    | 0.00                 | 2.63                             | 0.00                 | 2.63                          | 0.00                 | 2.52                          | 0.00                 |
| PLASARI_TGFB1_TARGETS_10HR_UP                     | 1.78                  | 0.00                 | 1.97                        | 0.00                 | 1.90                    | 0.00                 | 0.97                             | 0.53                 | 1.42                          | 0.03                 | 1.15                          | 0.18                 |
| REACTOME_SIGNALING_BY_TGFB_FAMILY_MEMBERS         | 1.16                  | 0.26                 | 1.59                        | 0.02                 | NA                      | NA                   | 1.57                             | 0.04                 | 1.33                          | 0.12                 | 0.76                          | 0.85                 |
| TGFB_UP.V1_UP                                     | 1.61                  | 0.01                 | 1.56                        | 0.01                 | 0.79                    | 0.75                 | 0.86                             | 0.70                 | -0.57                         | 0.97                 | 1.04                          | 0.40                 |
| VERRECCHIA_DELAYED_RESPONSE_TO_TGFB1              | 2.55                  | 0.00                 | 1.76                        | 0.02                 | NA                      | NA                   | 1.96                             | 0.00                 | 2.19                          | 0.00                 | 2.27                          | 0.00                 |
| VERRECCHIA_EARLY_RESPONSE_TO_TGFB1                | 3.06                  | 0.00                 | 3.11                        | 0.00                 | NA                      | NA                   | 3.08                             | 0.00                 | 2.85                          | 0.00                 | 2.69                          | 0.00                 |
| WP_TGFBETA_RECEPTOR_SIGNALING                     | 1.94                  | 0.01                 | 1.85                        | 0.01                 | NA                      | NA                   | 1.76                             | 0.01                 | 1.90                          | 0.01                 | 1.35                          | 0.09                 |
| WP_TGFBETA_RECEPTOR_SIGNALING_IN_SKELETAL_DYSPLA  | 1.87                  | 0.00                 | 1.83                        | 0.00                 | NA                      | NA                   | 1.88                             | 0.01                 | 1.92                          | 0.00                 | 1.27                          | 0.15                 |

| *-Postive NES score |
|---------------------|
| 1.00                |
| 2.00                |
| 3.00                |
| 4.00                |

| Significance                           |
|----------------------------------------|
| % -p-val < 0.05 considered significant |
| NA = Not available                     |

| &- Datasets used          |
|---------------------------|
| Gill-GSE59612             |
| Gravendeel-GSE16011       |
| Grzmil-GSE59612           |
| TCGA_Affymetrix-from TCGA |
| TCGA_Agilent-from TCGA    |
| TCGA_RNASeq-from TCGA     |

## Enrichment of mesenchymal gene expression signature and TGF beta signaling pathway in DGCs

| Gene expression sub type# or signaling pathway <sup>§</sup> | Glioma stem-like cells (GSCs) <sup>&amp;</sup> |            |            |            |            |            |            |            |            | Differentiated glioma cells (DGCs) <sup>&amp;</sup> |            |            |            |            |            |            |            |            |
|-------------------------------------------------------------|------------------------------------------------|------------|------------|------------|------------|------------|------------|------------|------------|-----------------------------------------------------|------------|------------|------------|------------|------------|------------|------------|------------|
|                                                             | MGG4_GSC_1                                     | MGG4_GSC_2 | MGG4_GSC_3 | MGG6_GSC_1 | MGG6_GSC_2 | MGG6_GSC_3 | MGG8_GSC_1 | MGG8_GSC_2 | MGG8_GSC_3 | MGG4_DGC_1                                          | MGG4_DGC_2 | MGG4_DGC_3 | MGG6_DGC_1 | MGG6_DGC_2 | MGG6_DGC_3 | MGG8_DGC_1 | MGG8_DGC_2 | MGG8_DGC_3 |
| VERHAAK_GLIOMASTOMA_CLASSICAL                               | -0.21                                          | -0.25      | -0.30      | 0.17       | 0.14       | 0.19       | -0.23      | -0.06      | -0.27      | -0.14                                               | -0.02      | -0.08      | 0.10       | -0.09      | -0.11      | -0.10      | -0.20      | -0.13      |
| VERHAAK_GLIOMASTOMA_MESENCHYMAL                             | -0.47                                          | -0.45      | -0.47      | -0.47      | -0.39      | -0.47      | -0.50      | -0.45      | -0.49      | 0.32                                                | 0.31       | 0.33       | 0.39       | 0.35       | 0.28       | 0.24       | 0.23       | 0.18       |
| VERHAAK_GLIOMASTOMA_NEURAL                                  | -0.02                                          | 0.08       | 0.09       | -0.17      | -0.06      | -0.28      | 0.03       | -0.28      | -0.03      | 0.07                                                | 0.06       | 0.09       | 0.08       | 0.03       | -0.10      | 0.00       | 0.07       | 0.11       |
| VERHAAK_GLIOMASTOMA_PRONEURAL                               | 0.12                                           | 0.10       | 0.15       | 0.22       | 0.19       | 0.15       | 0.26       | 0.04       | 0.32       | -0.31                                               | -0.36      | -0.38      | -0.41      | -0.33      | -0.46      | -0.35      | -0.21      | -0.24      |
|                                                             |                                                |            |            |            |            |            |            |            |            |                                                     |            |            |            |            |            |            |            |            |
| HALLMARK_TGF_BETA_SIGNALING <sup>§</sup>                    | -0.33                                          | -0.28      | -0.22      | -0.28      | -0.42      | -0.31      | -0.47      | -0.34      | -0.54      | 0.08                                                | -0.02      | 0.01       | 0.19       | 0.18       | 0.31       | 0.29       | 0.27       | 0.30       |

#- Verhaak RG, Hoadley KA, Purdom E, Wang V, Qi Y, Wilkerson MD, Miller CR, Ding L, Golub T, Mesirov JP, et al.

Integrated genomic analysis identifies clinically relevant subtypes of glioblastoma characterized by abnormalities in PDGFRA, IDH1, EGFR, and NF1. Cancer Cell. 2010;17:98–110.

§- HALLMARK\_TGF\_BETA\_SIGNALING gene set from the Hallmark gene sets of the Molecular Signatures Database (MSigDB), containing genes up-regulated in response to TGFβ1.

& - Suva, M. L., E. Rheinbay, S. M. Gillespie, A. P. Patel, H. Wakimoto, et al. Reconstructing and reprogramming the tumor-propagating potential of glioblastoma stem-like cells. Cell.2014;157:580-94.

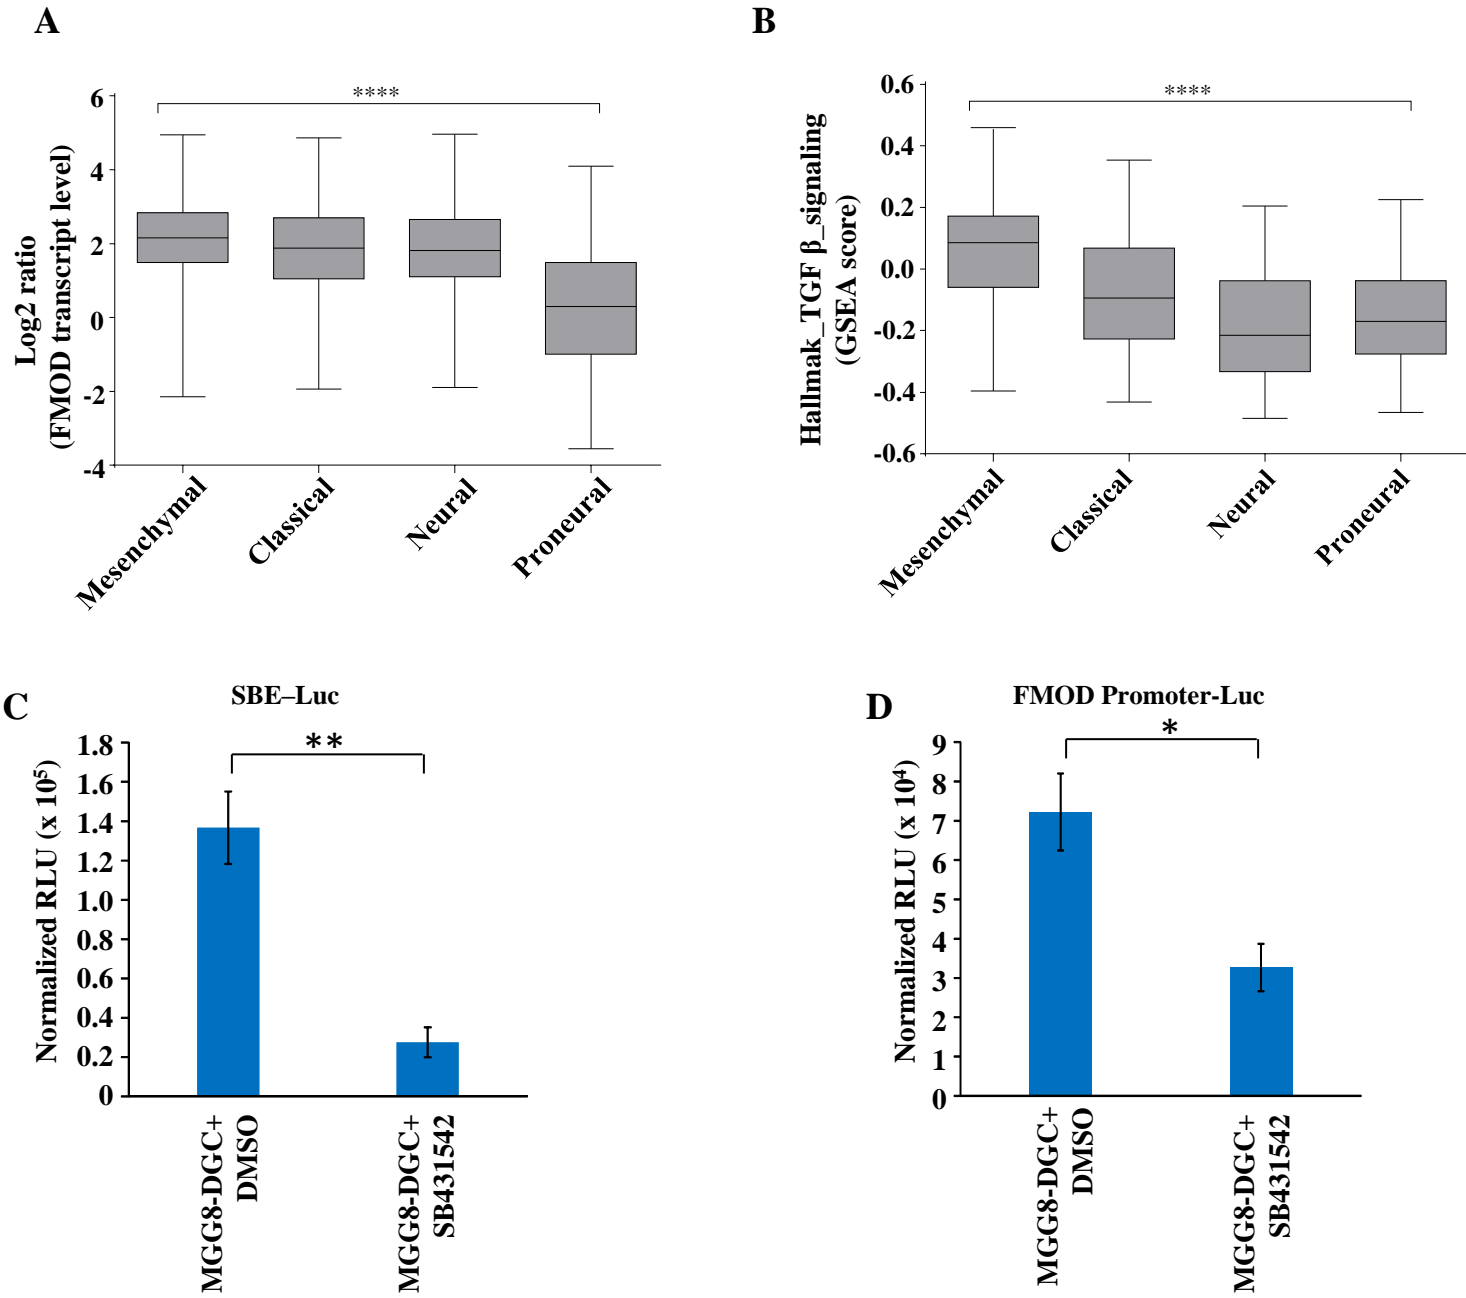

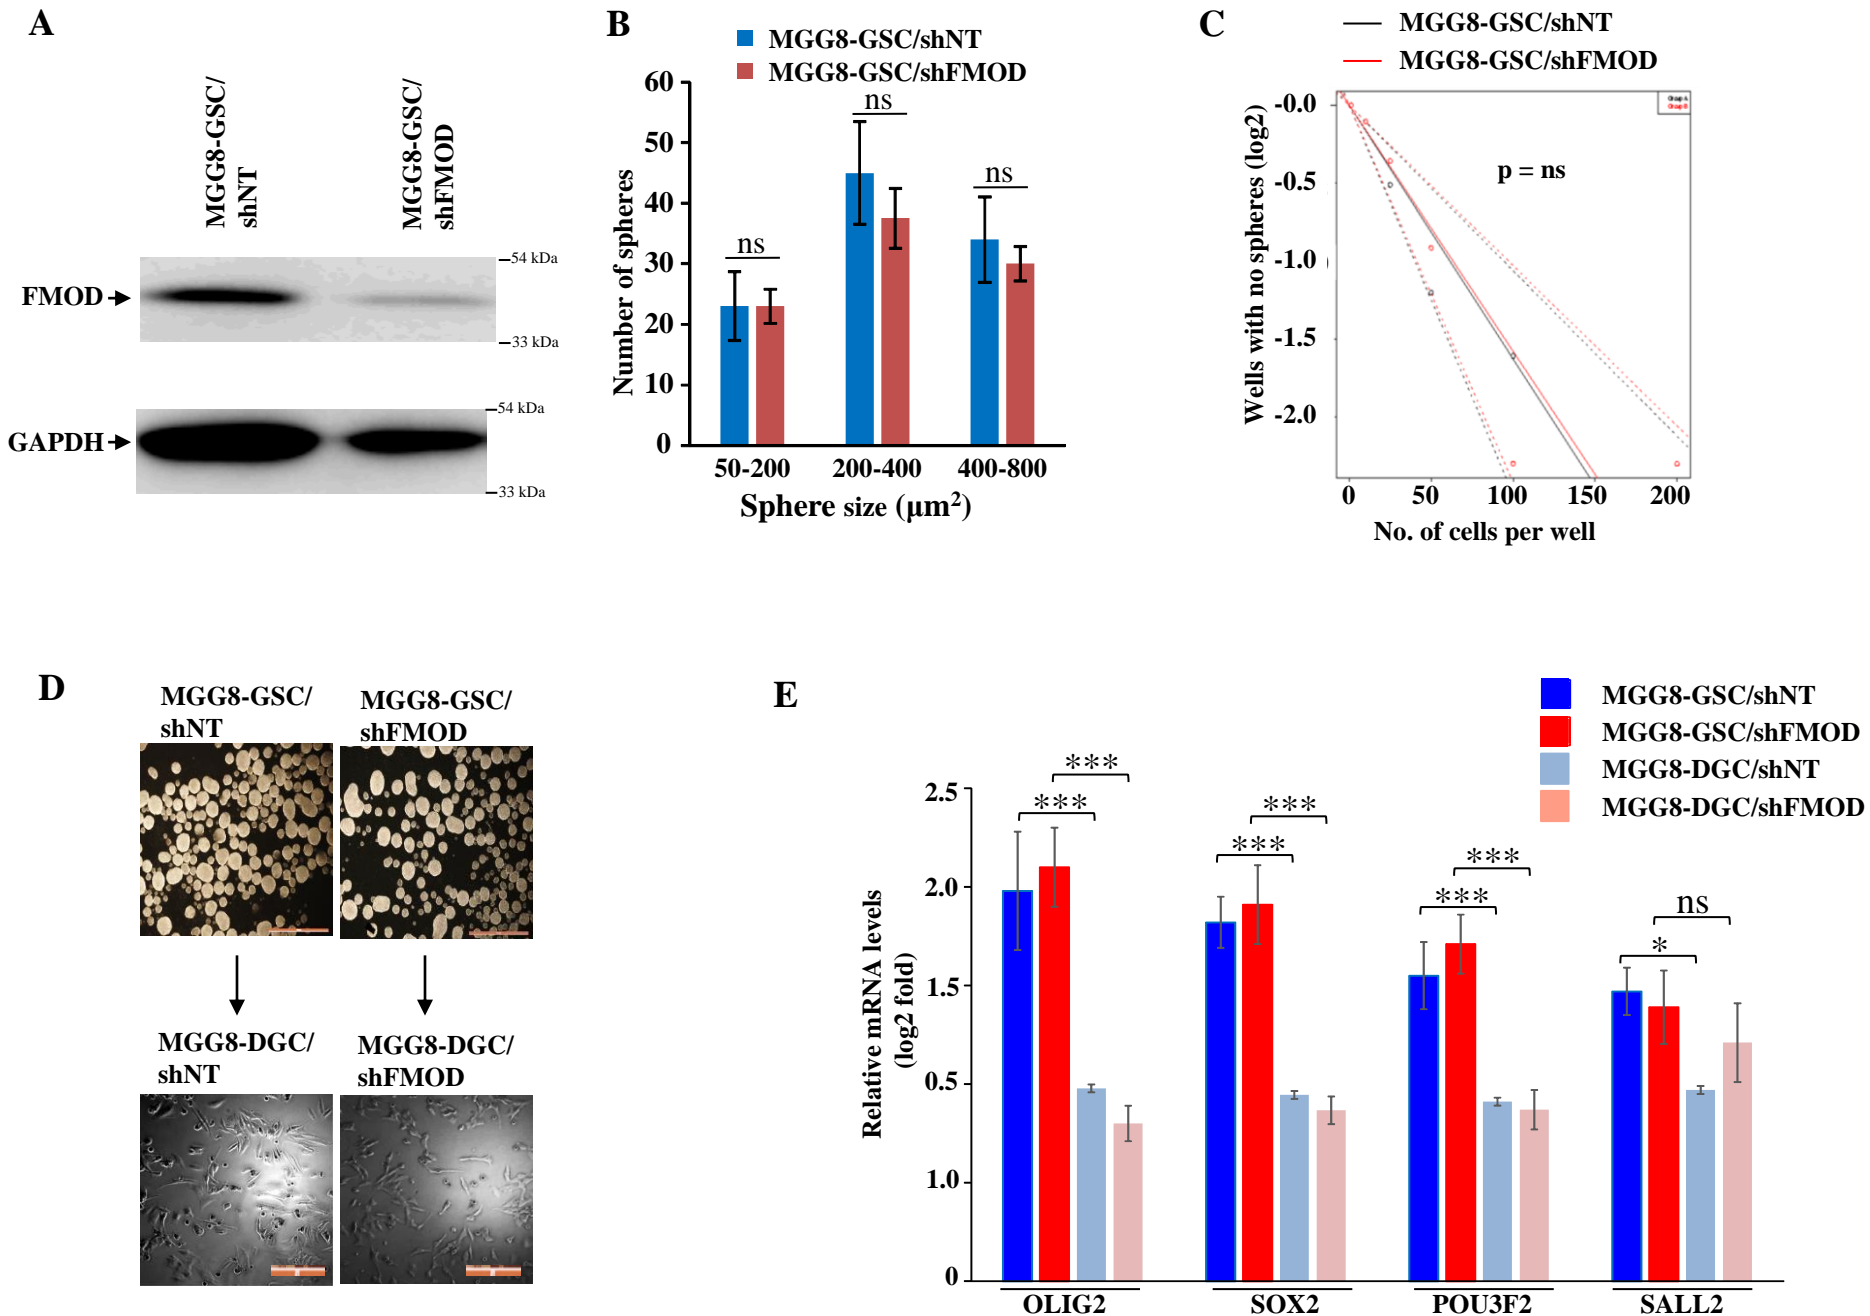

**A**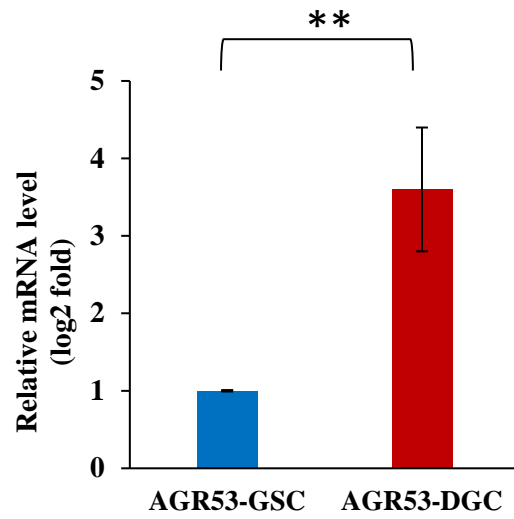**B**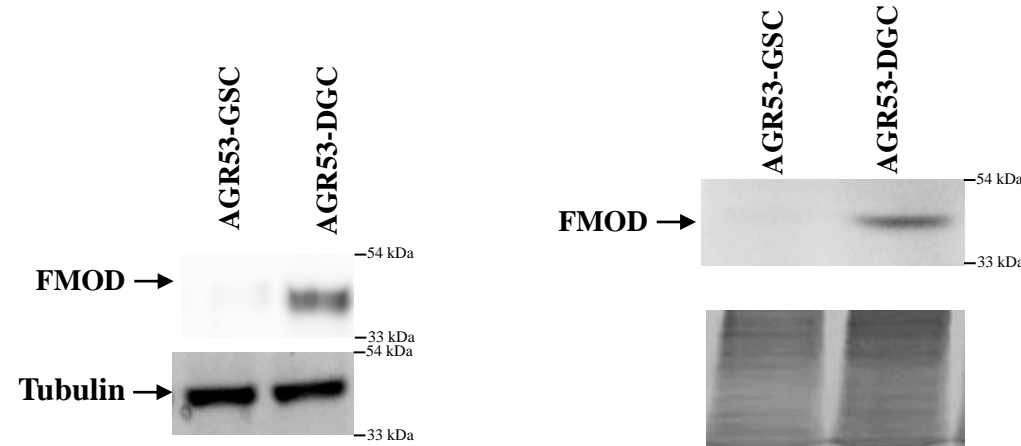**C**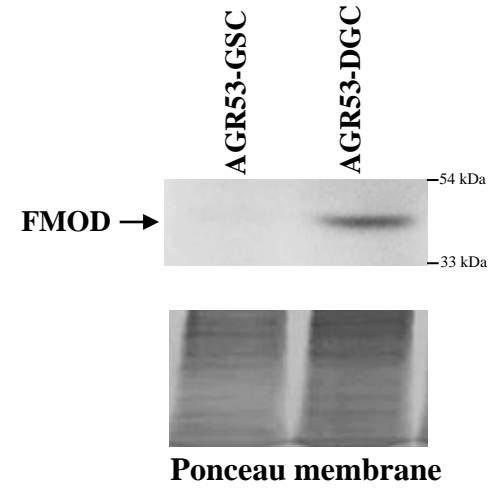**D**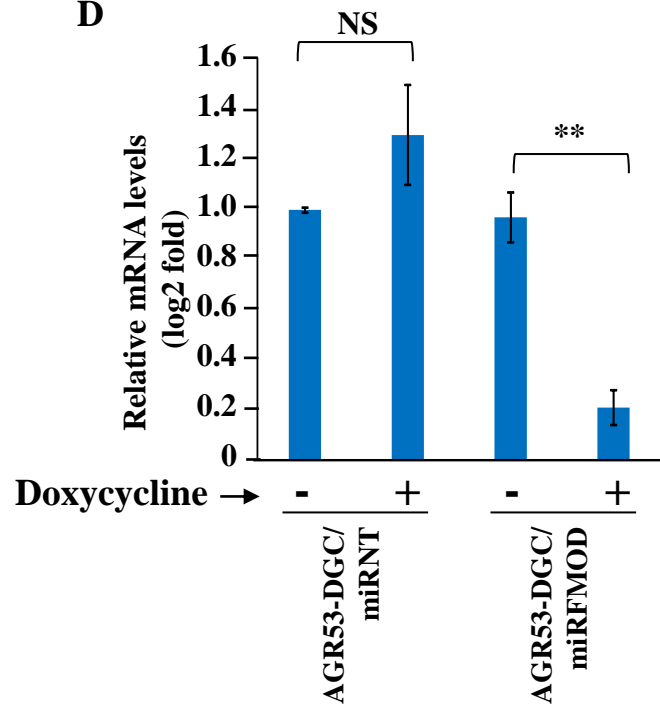**E**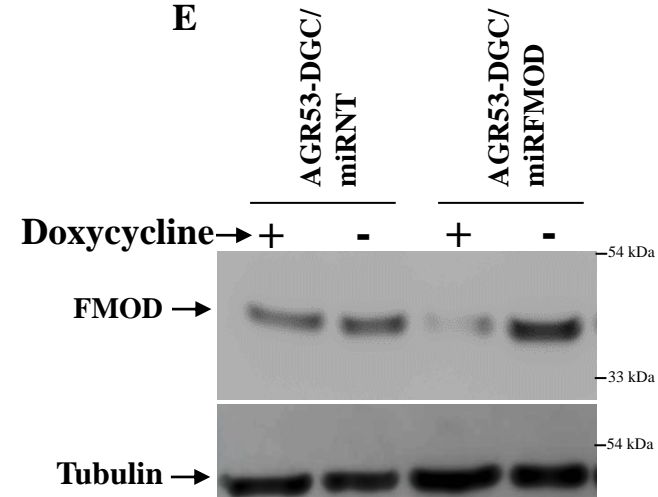



A

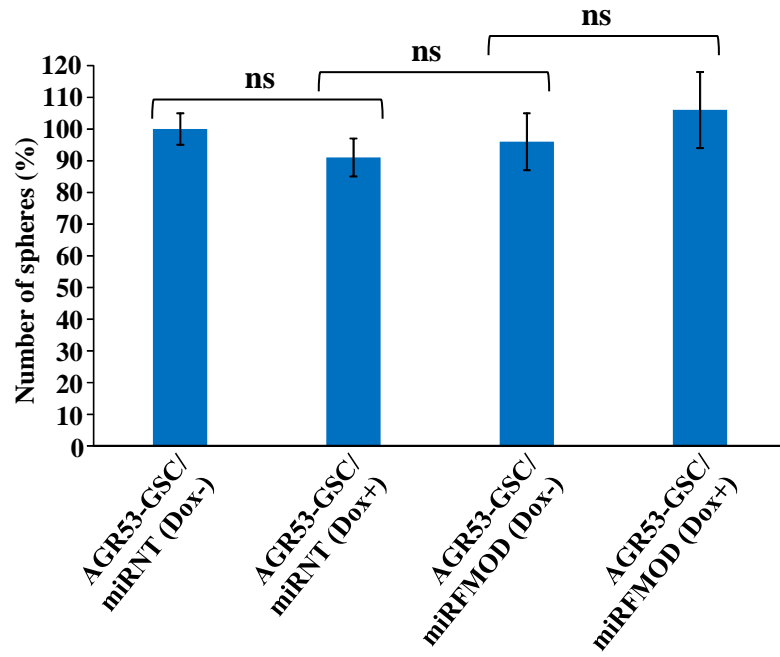

B

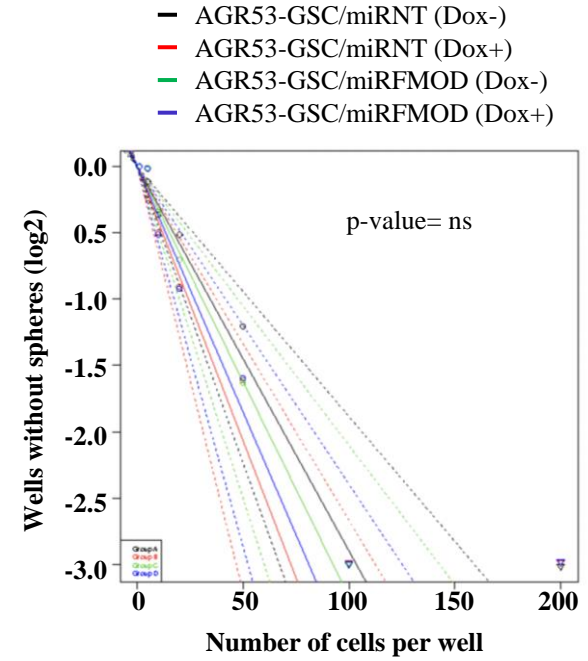

C

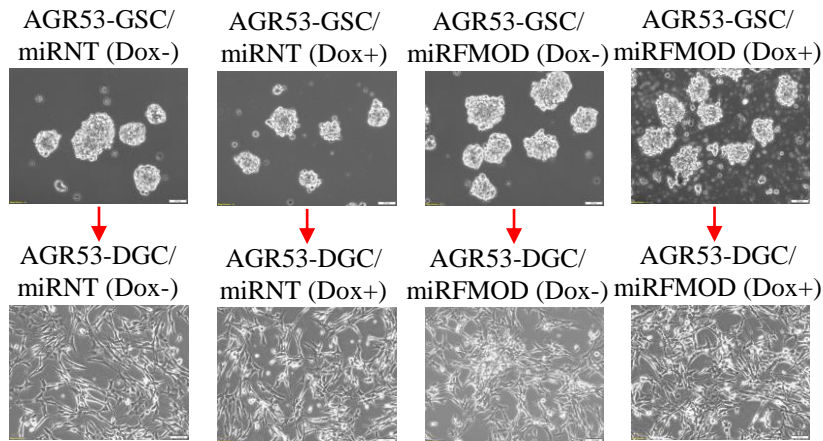

D

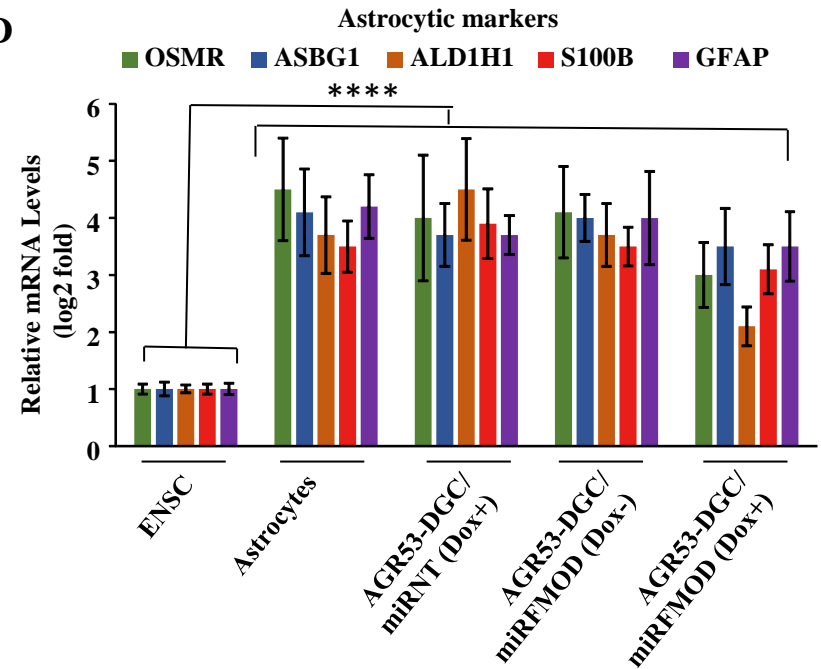

A

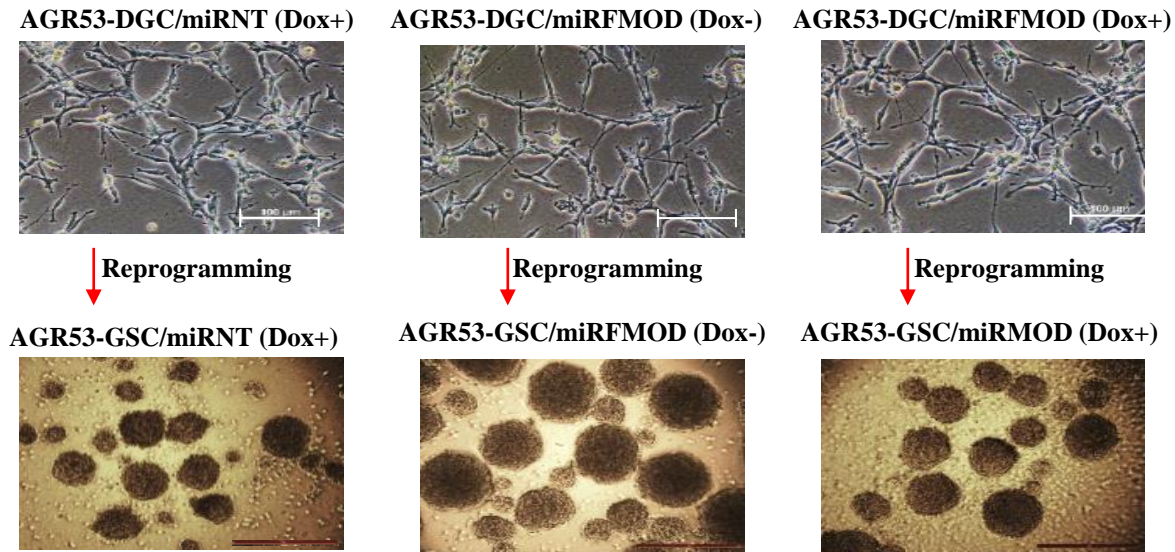

B

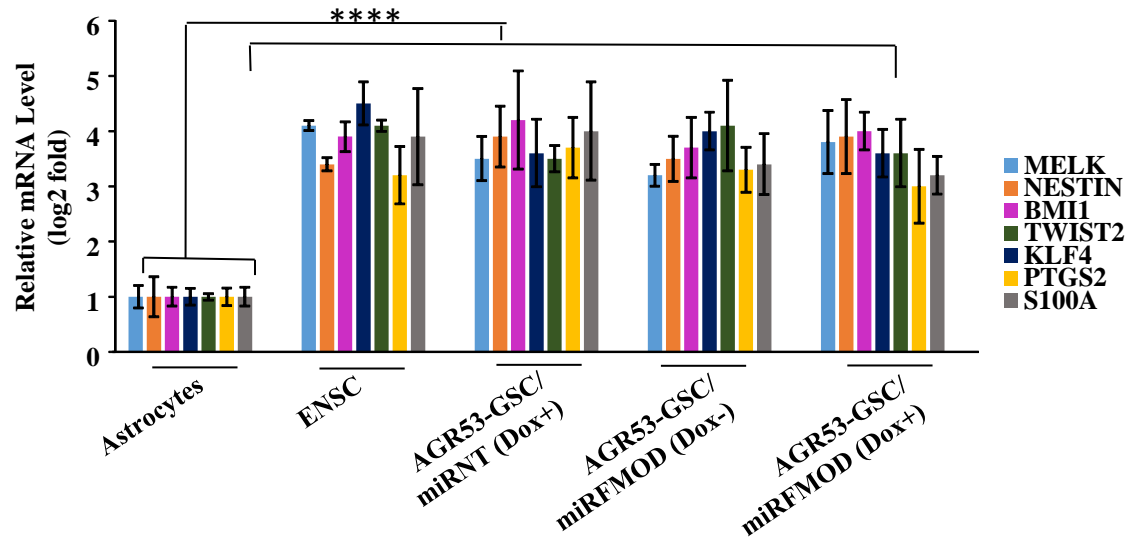

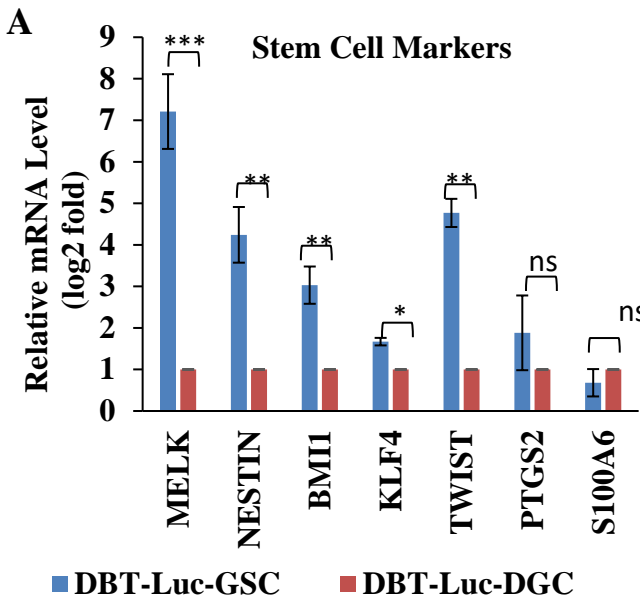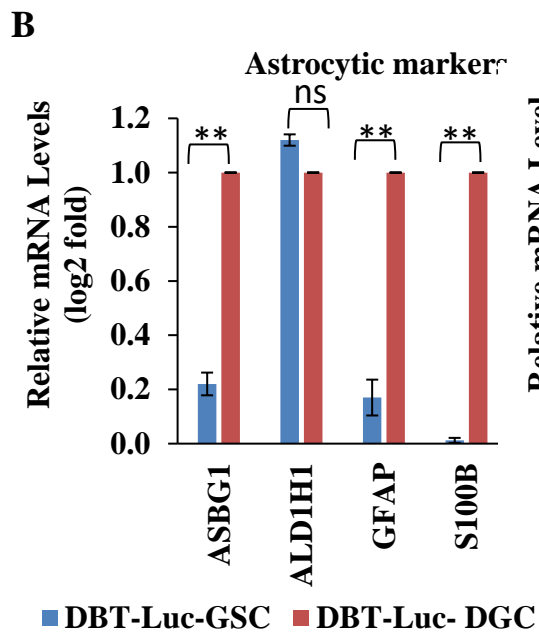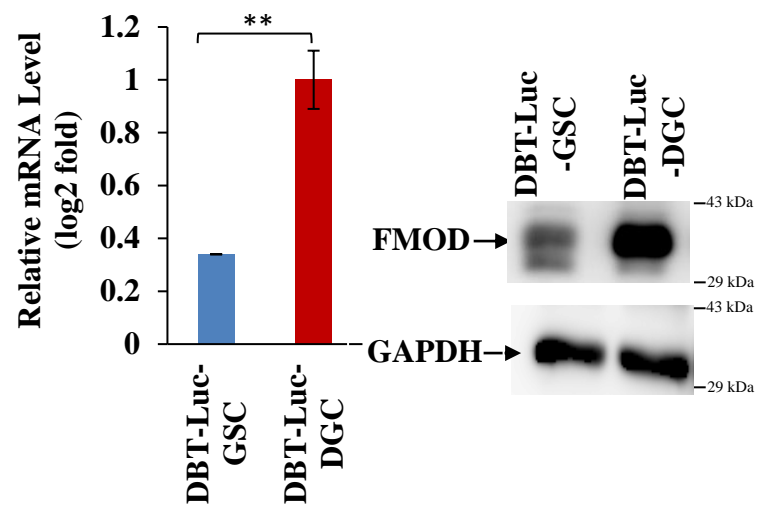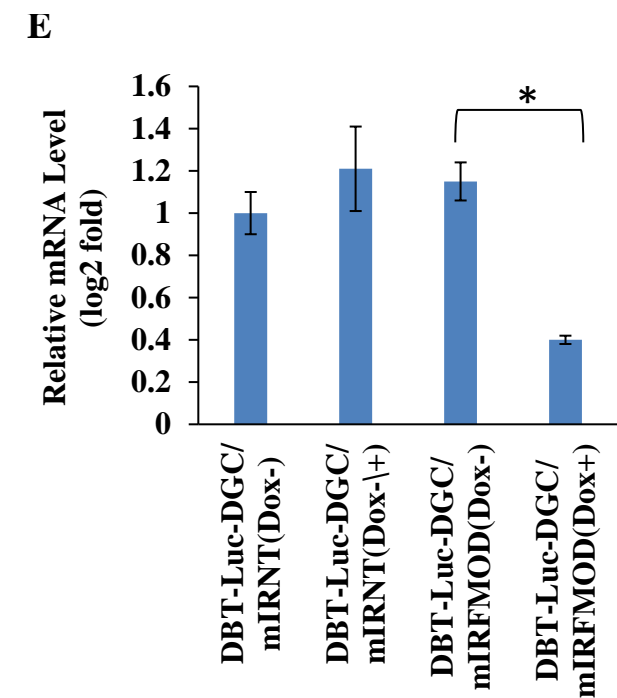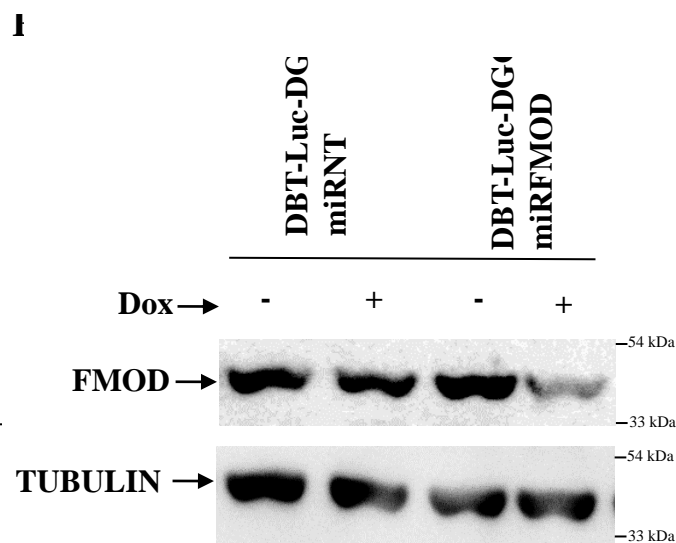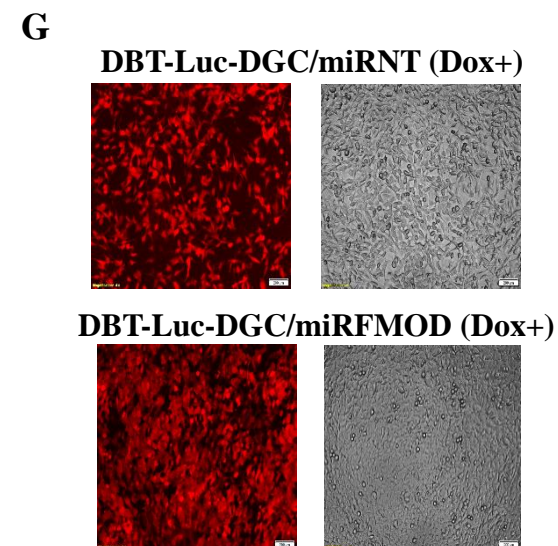

**B****A**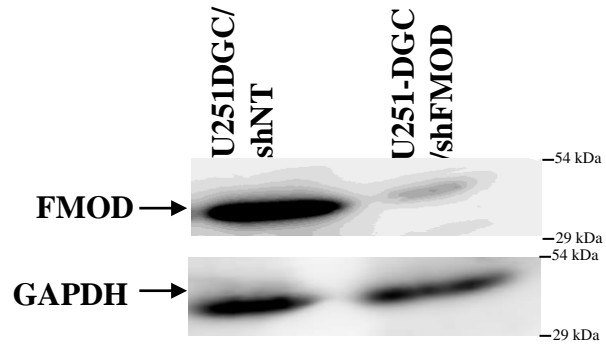U251-DGC/  
shNT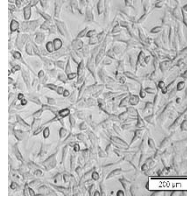U251-DGC/  
shFMOD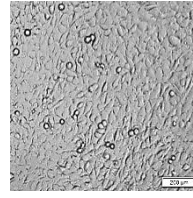U251-GSC/  
shNT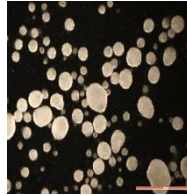U251-GSC/  
shFMOD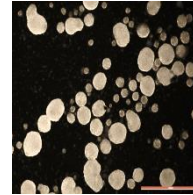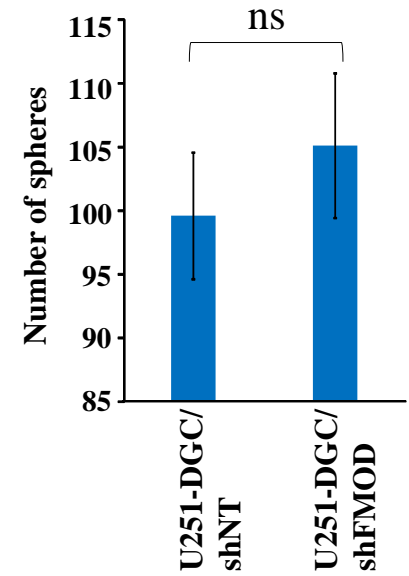**C**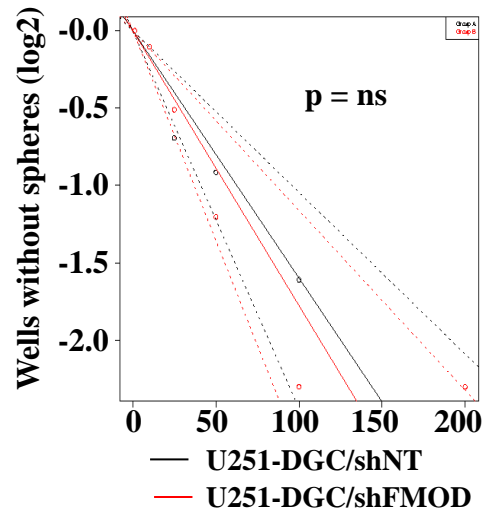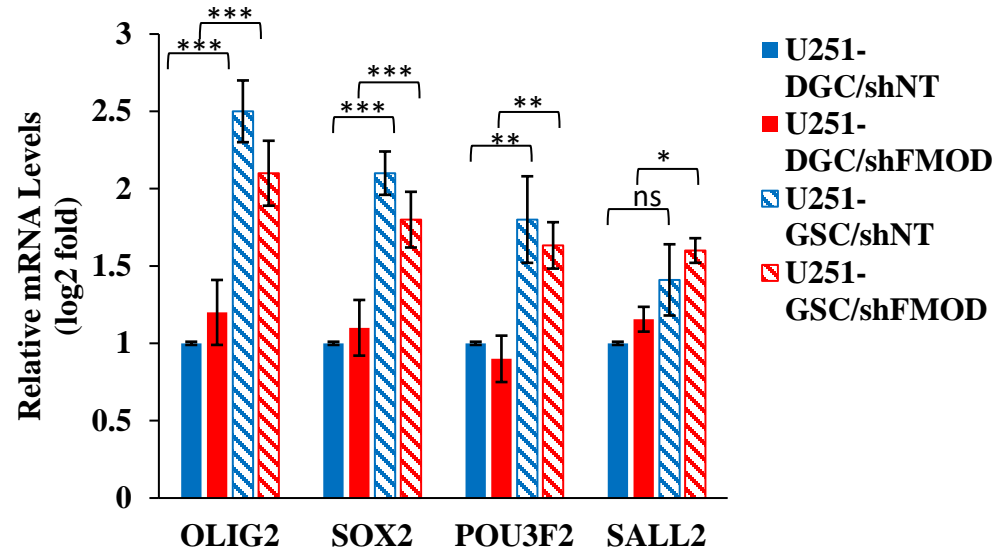

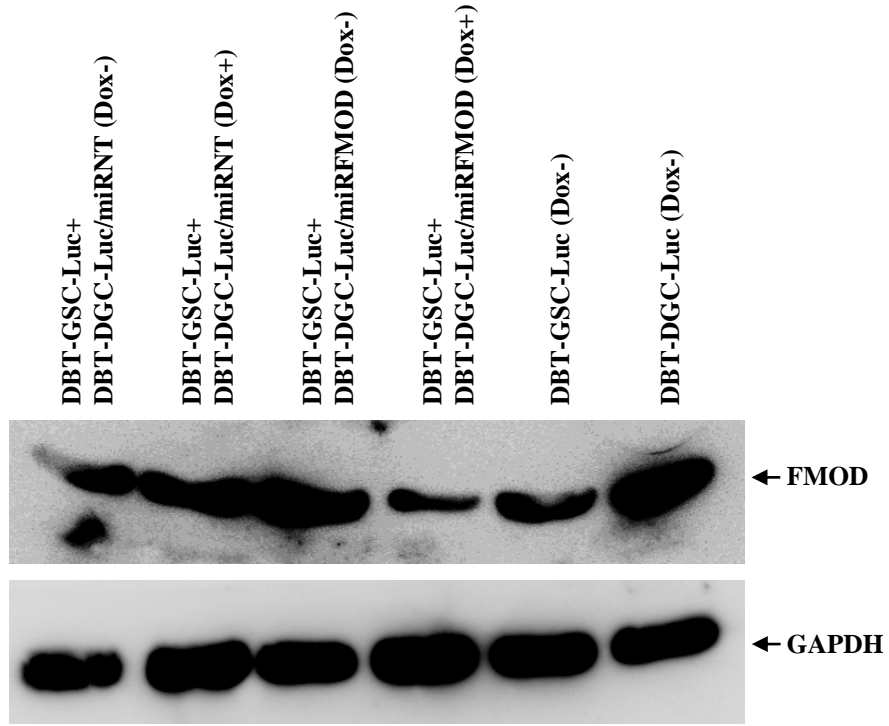

**Supplementary figures 13 to 22**



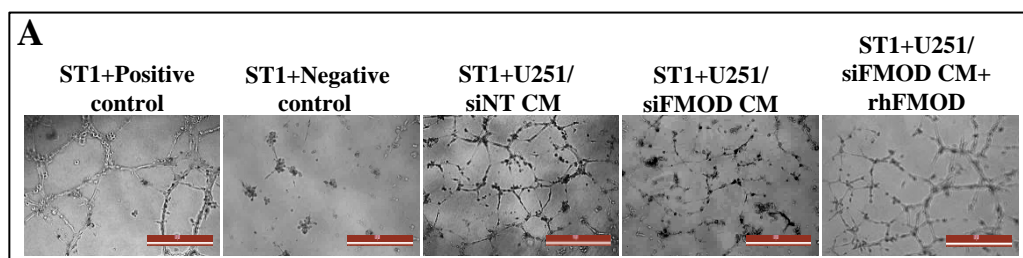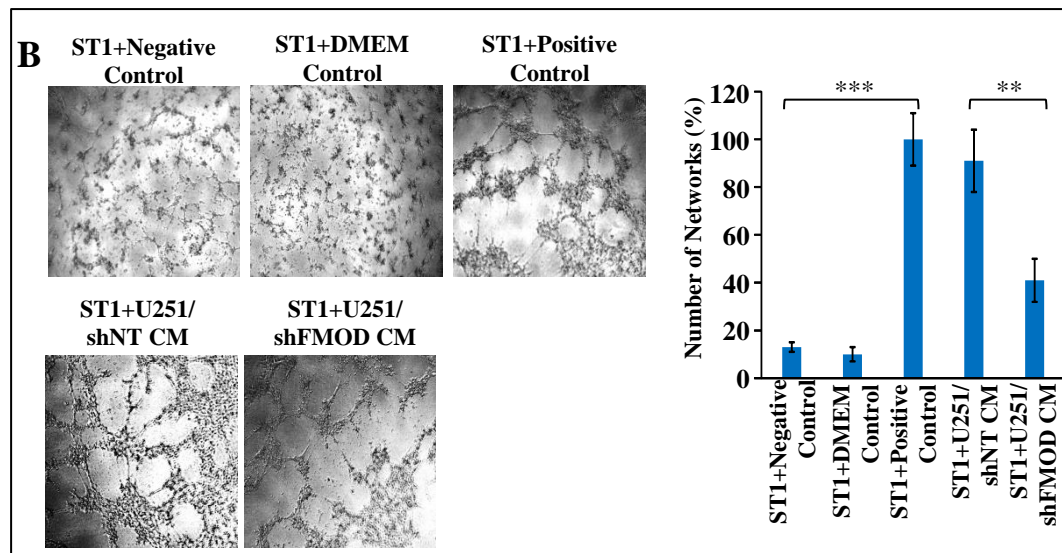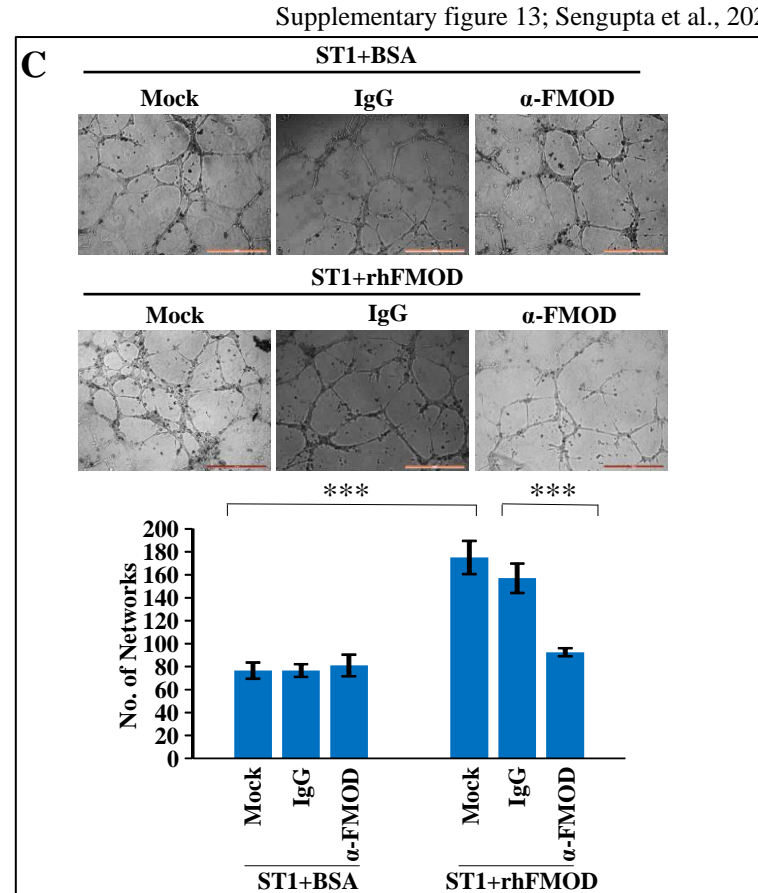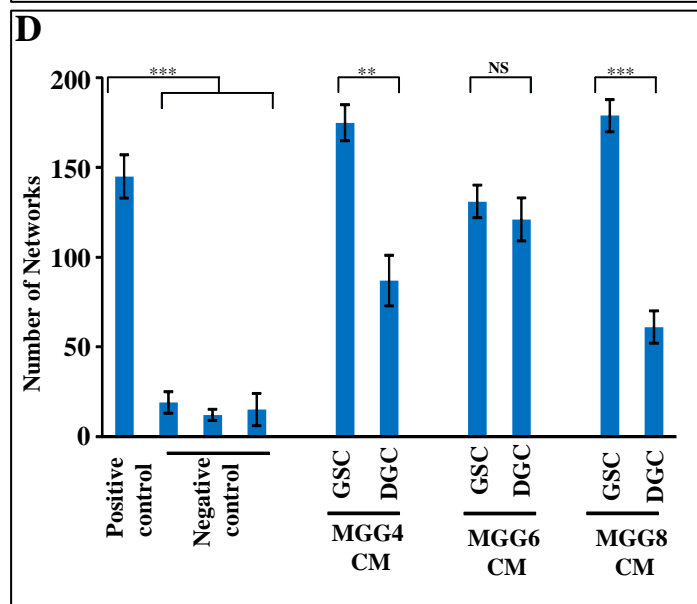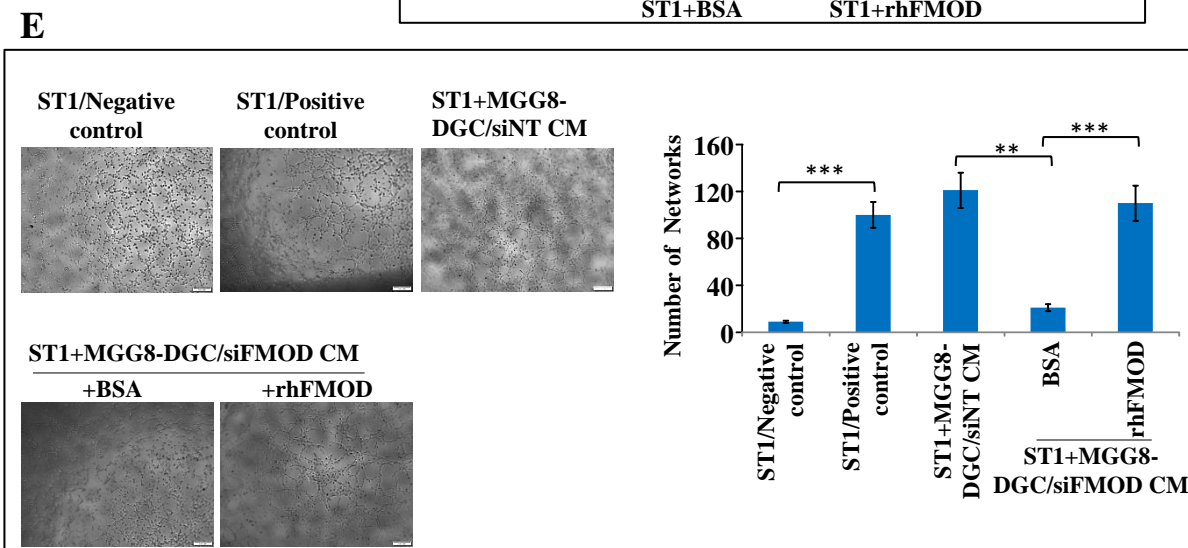

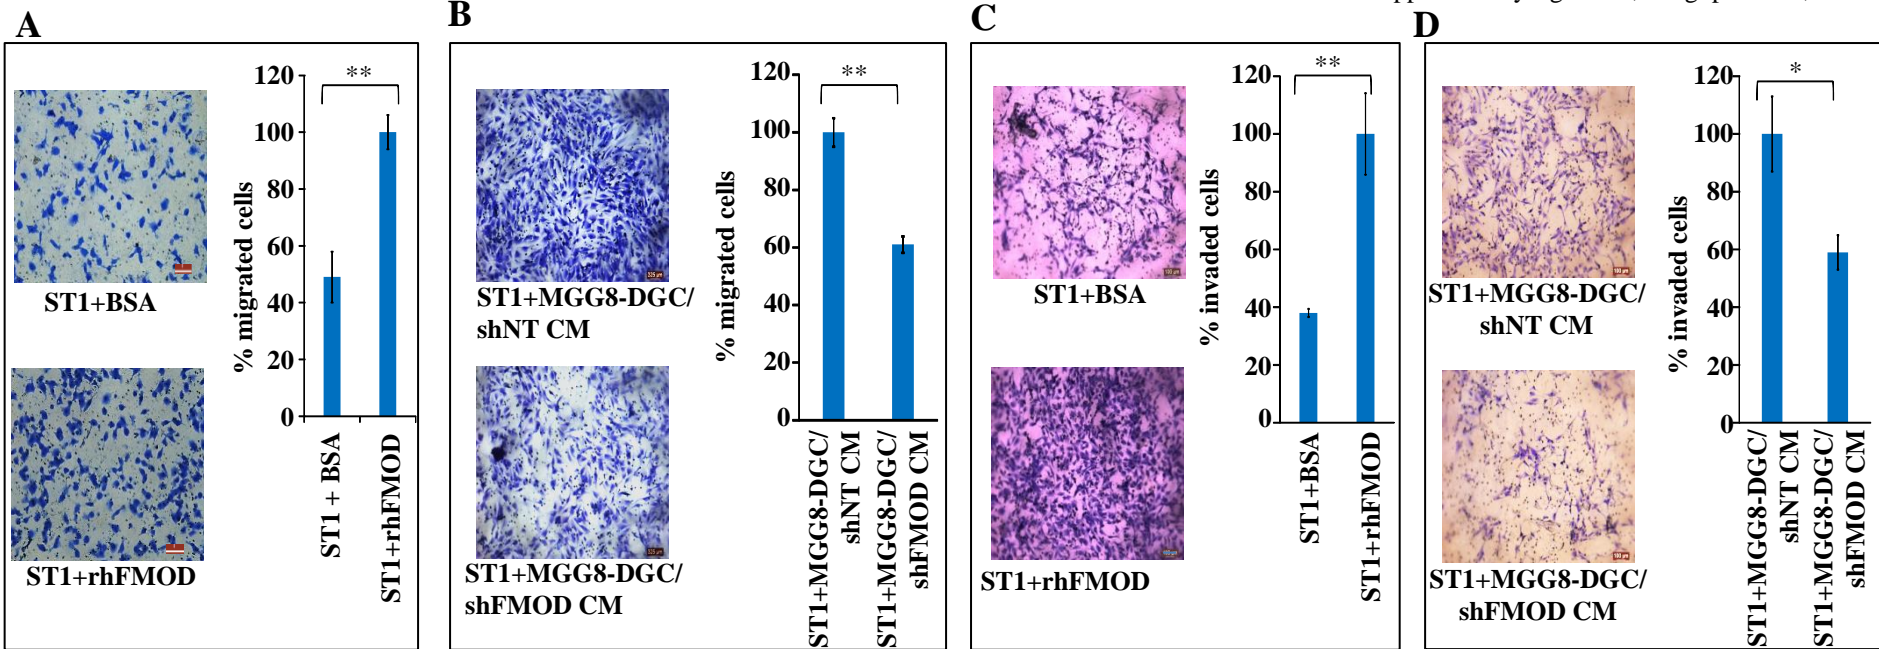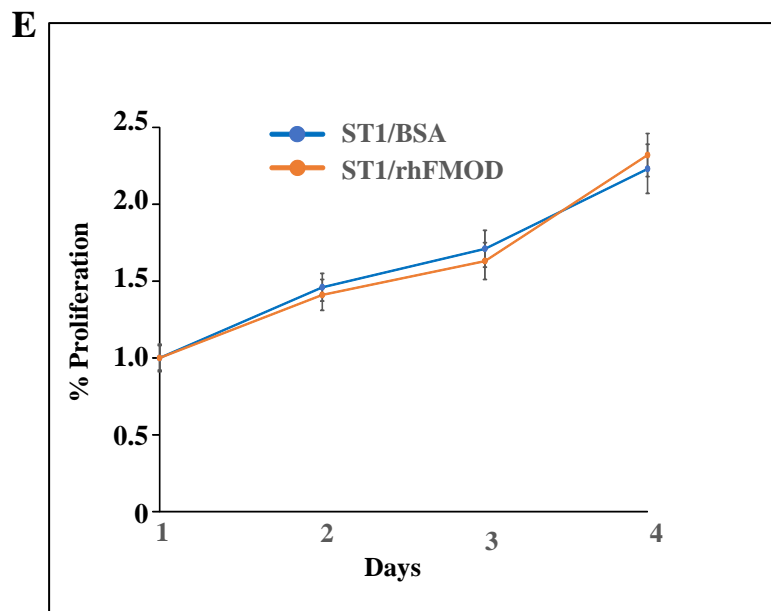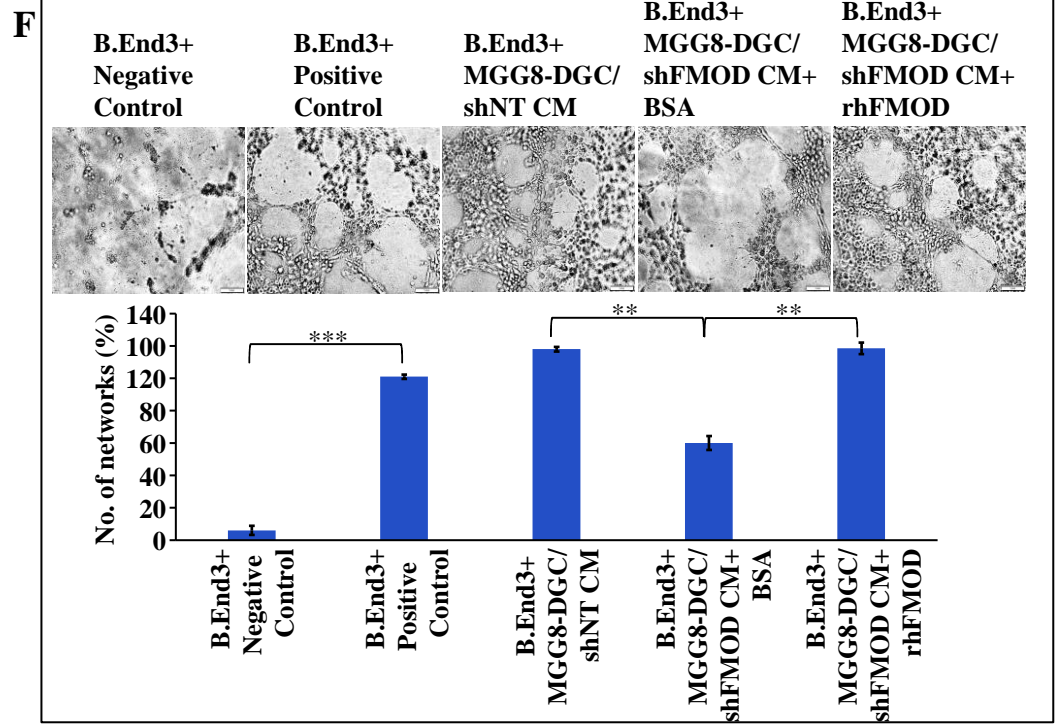

**A**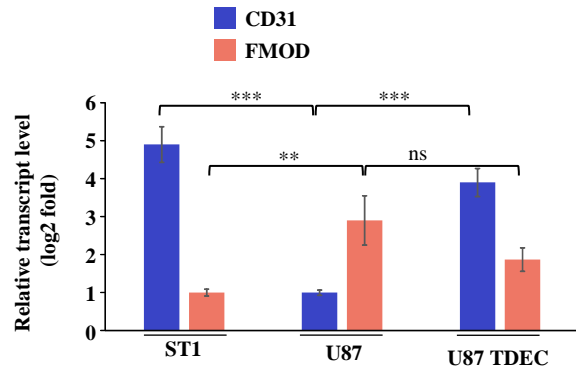**C**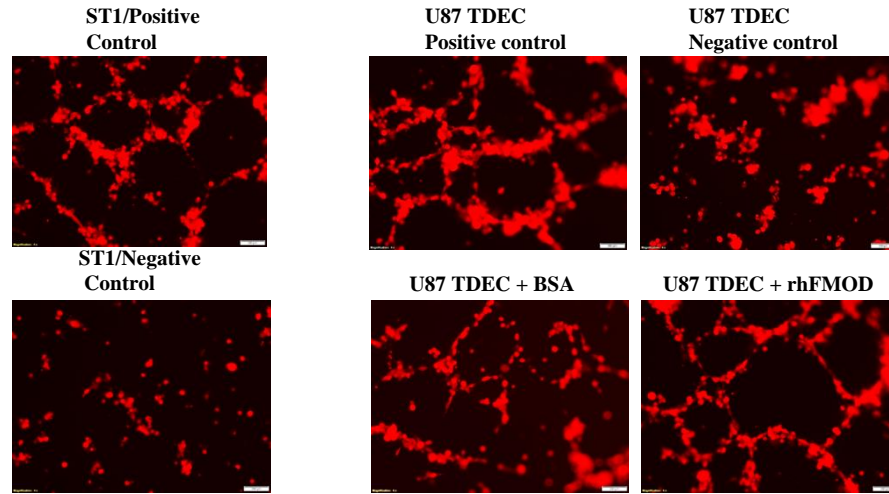**B**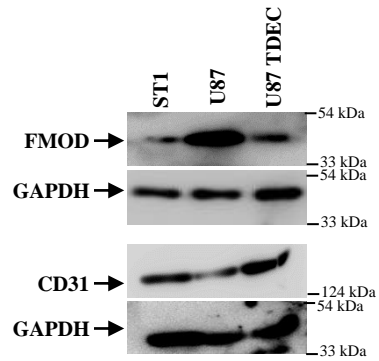**D**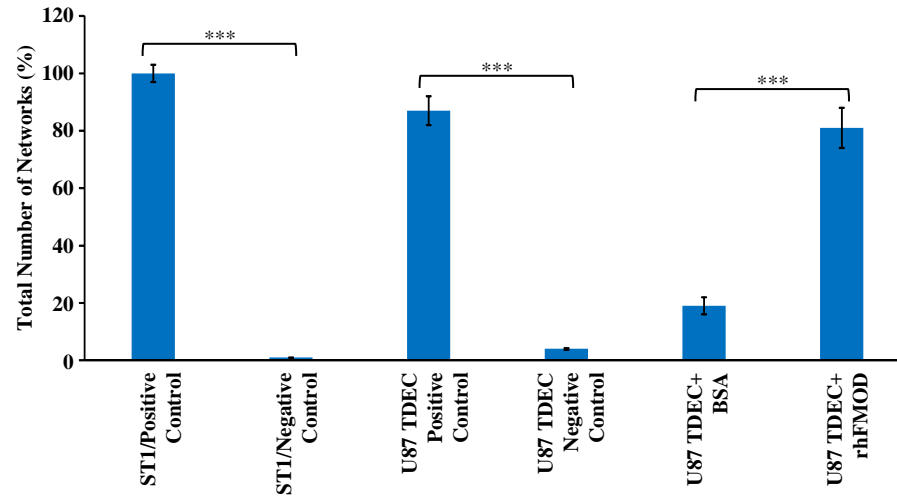

**A**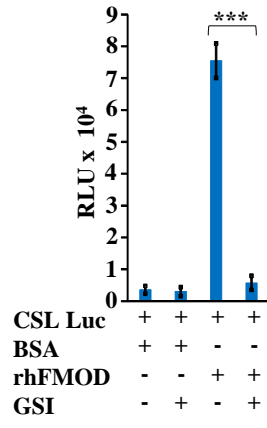**B**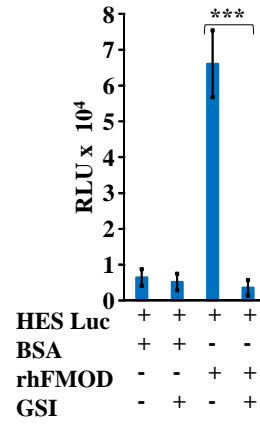**C**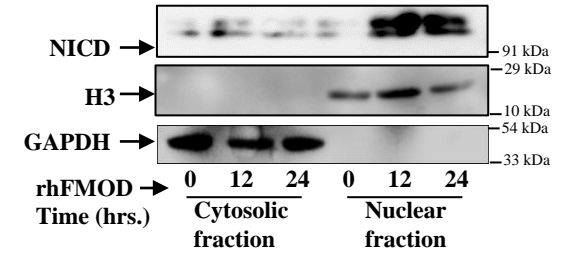**D**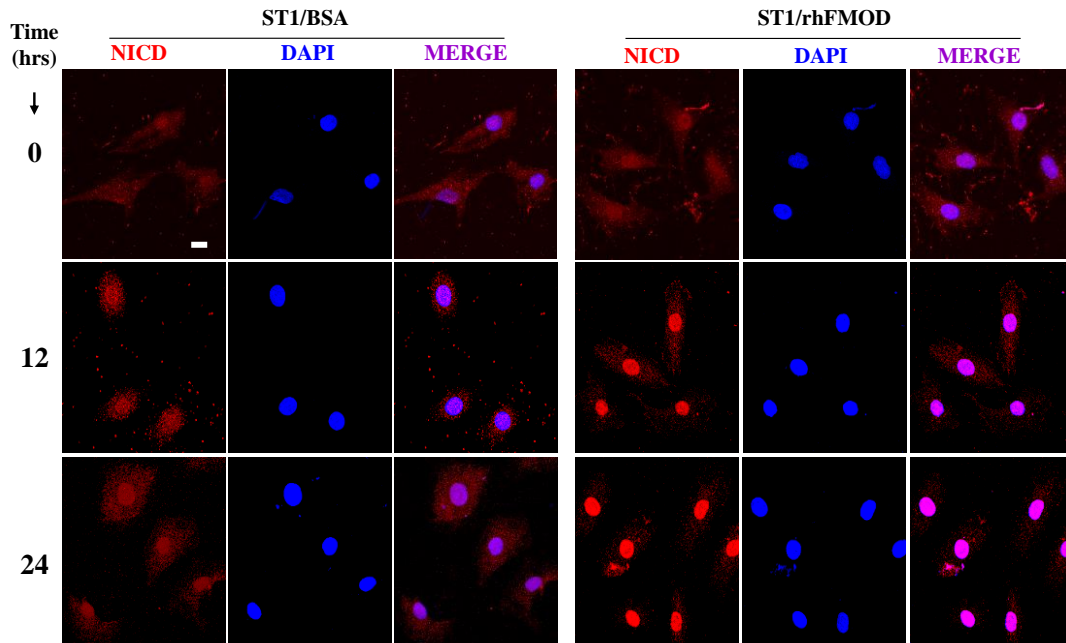**E**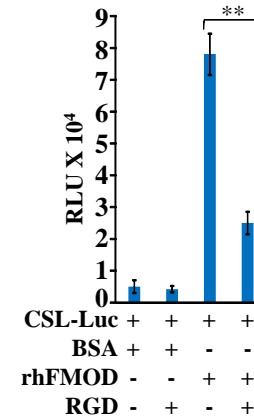**F**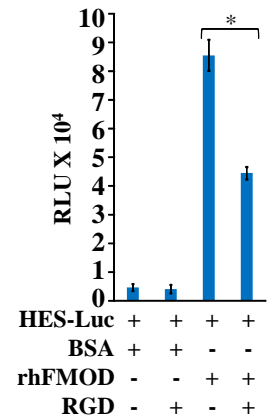



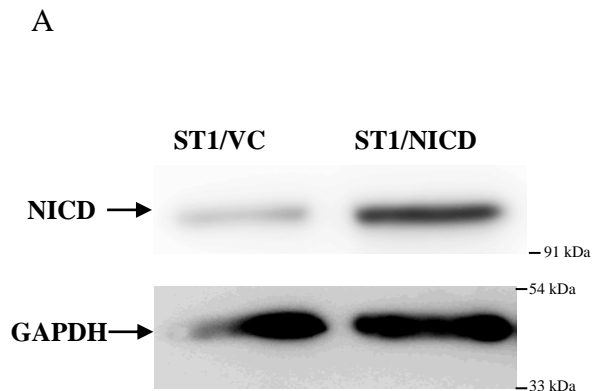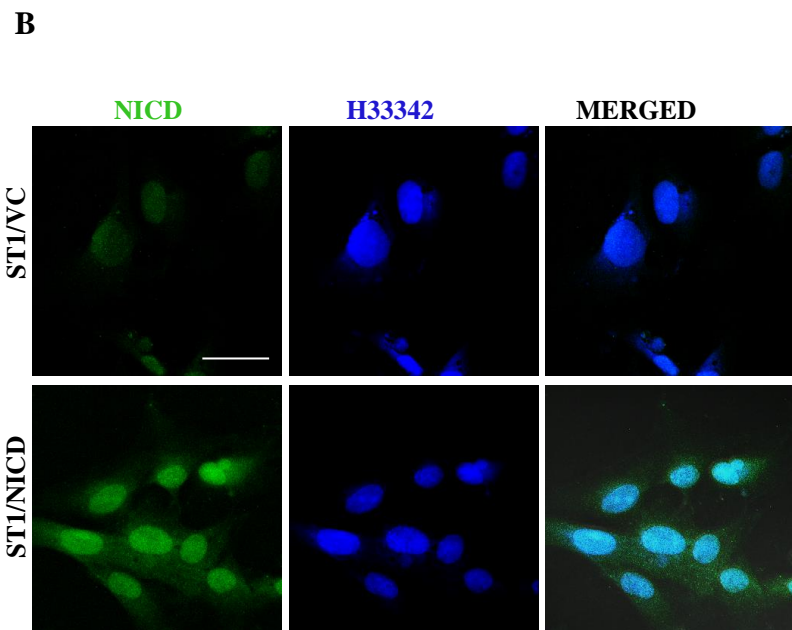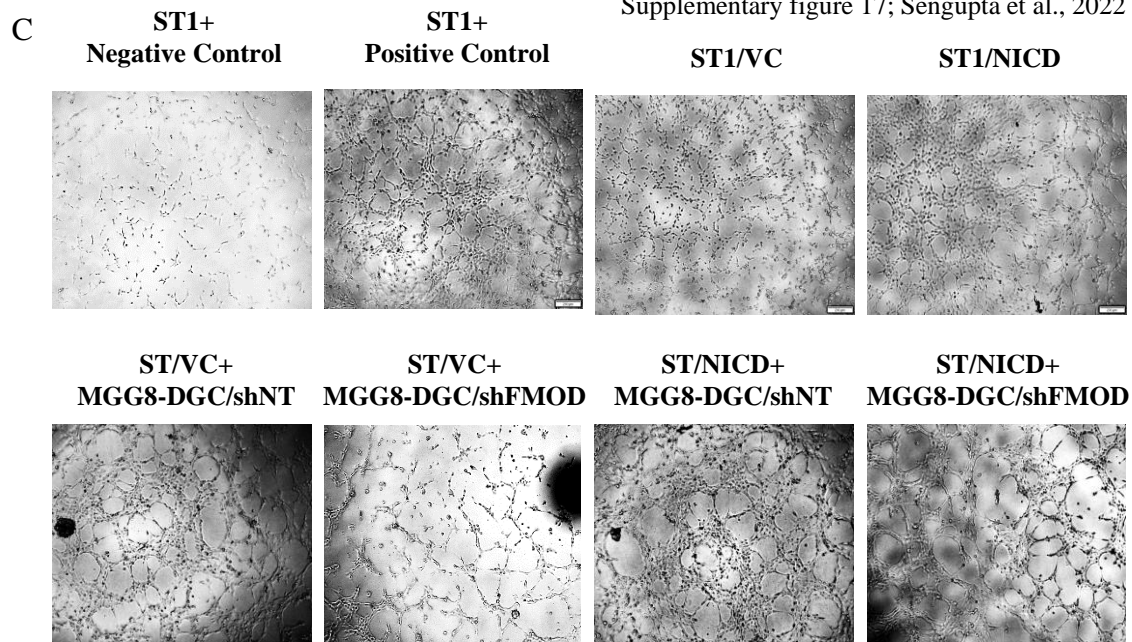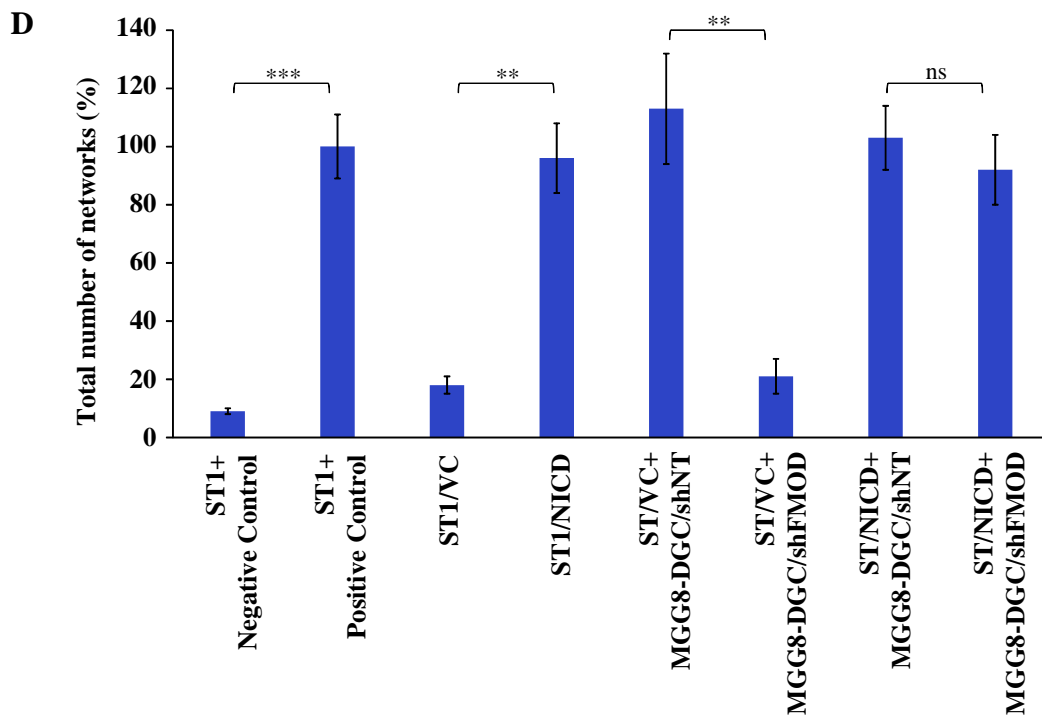

**A**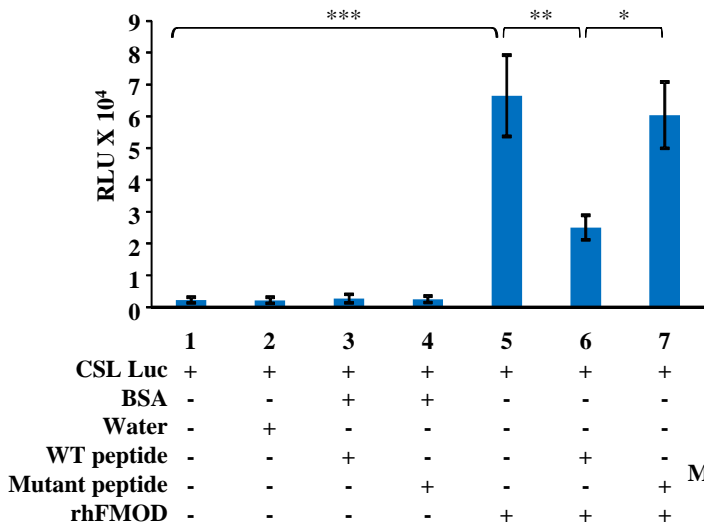**B**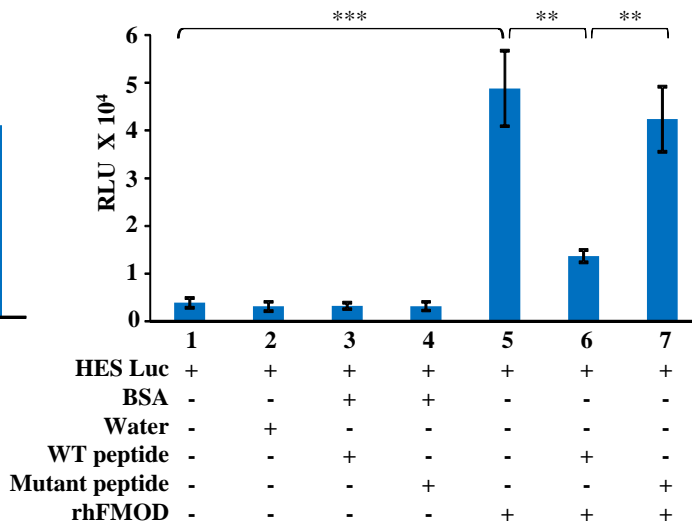**C**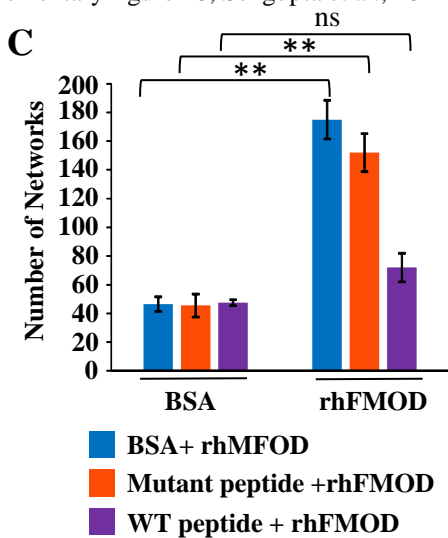**D**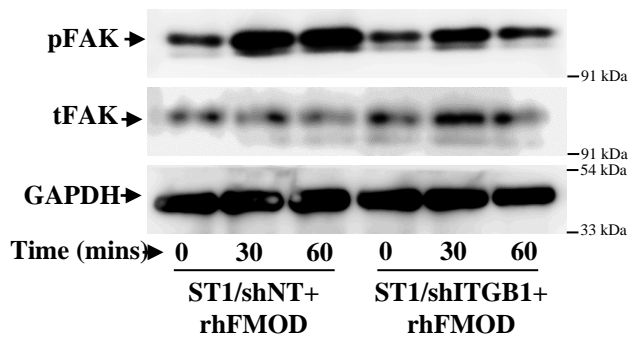**E**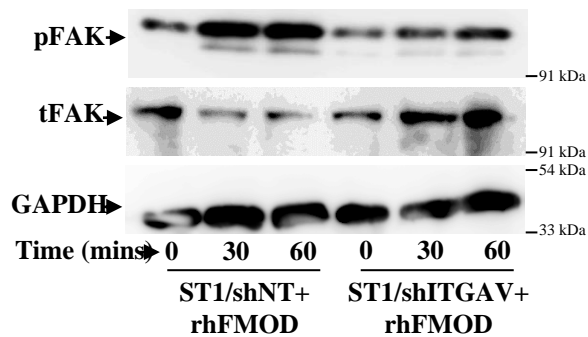**F**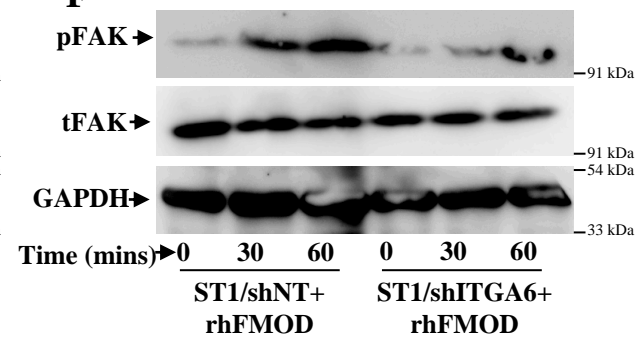**G**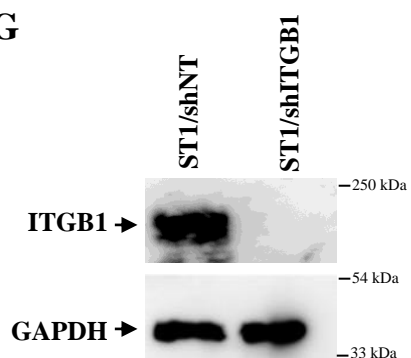**H**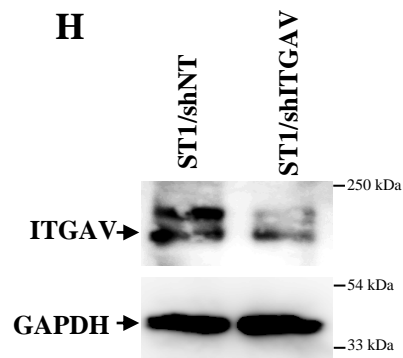**I**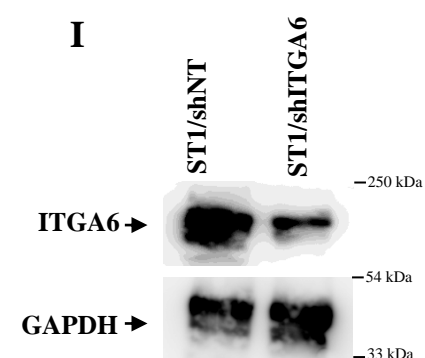



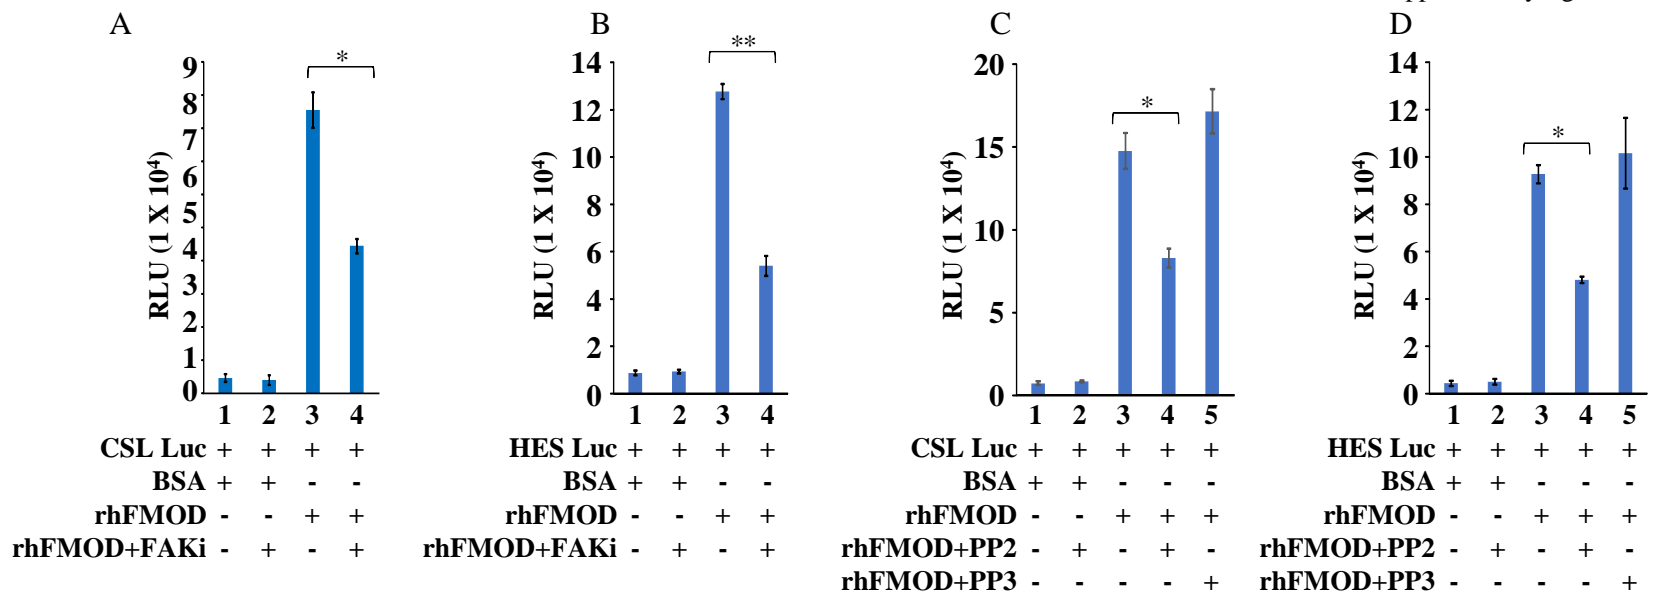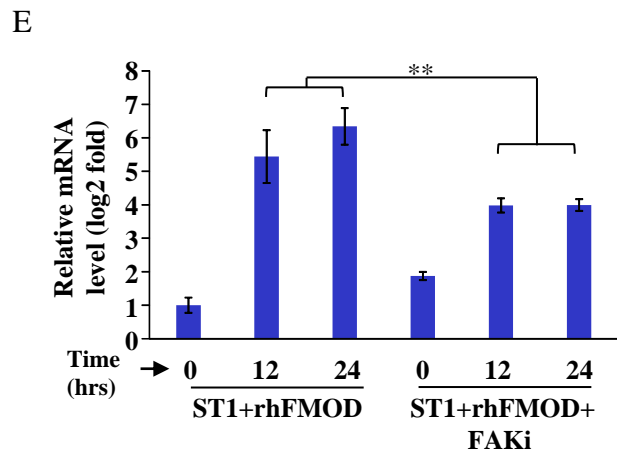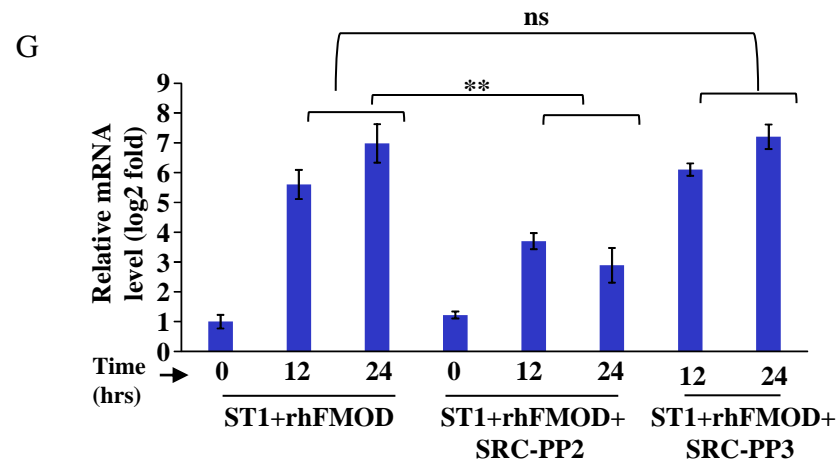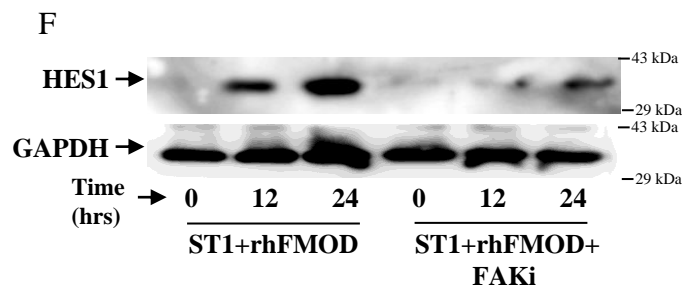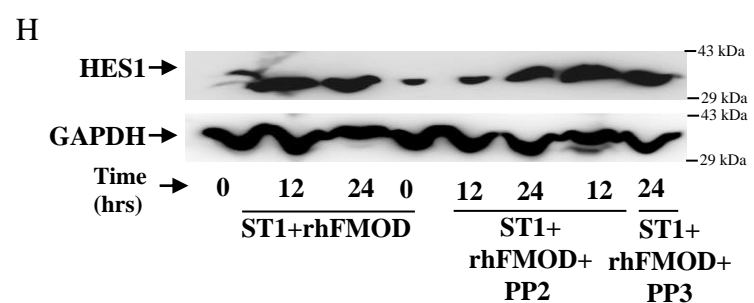

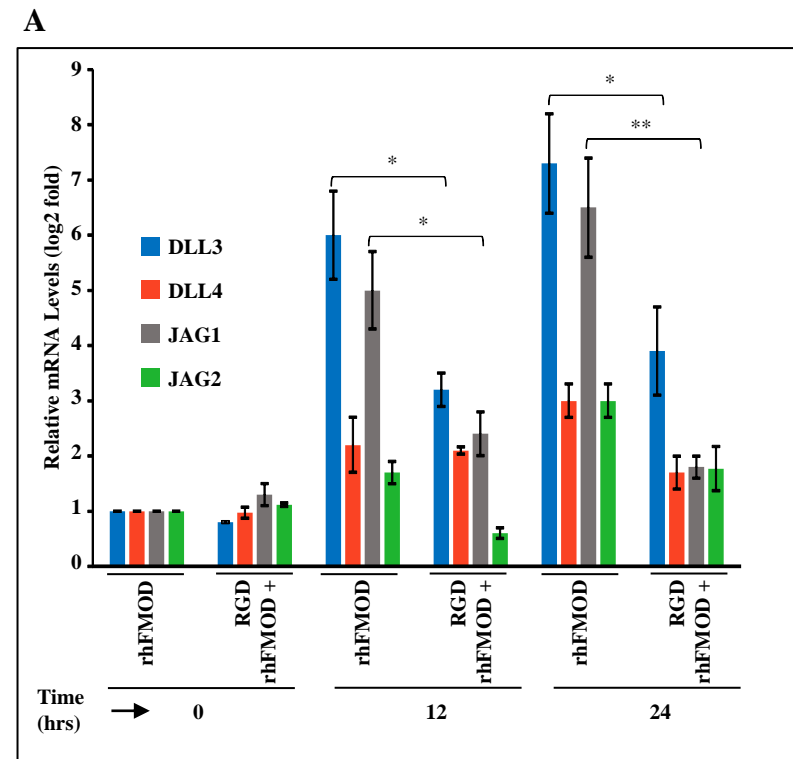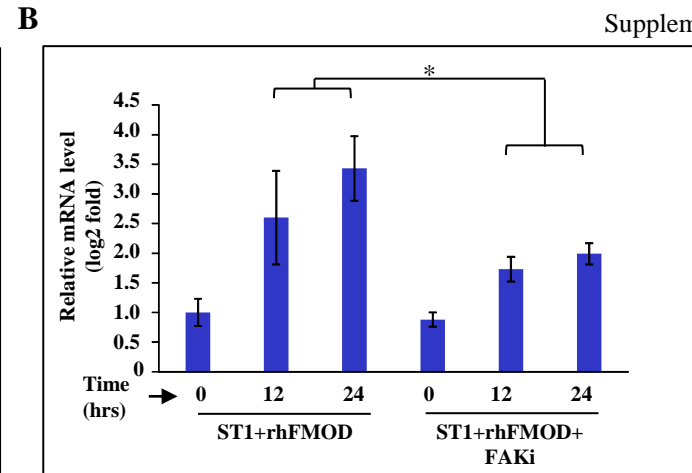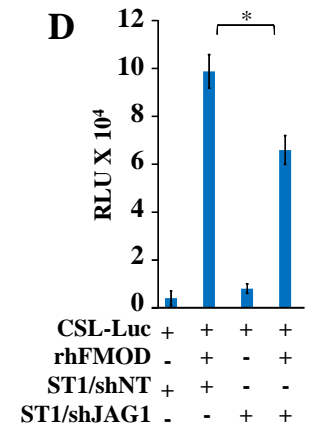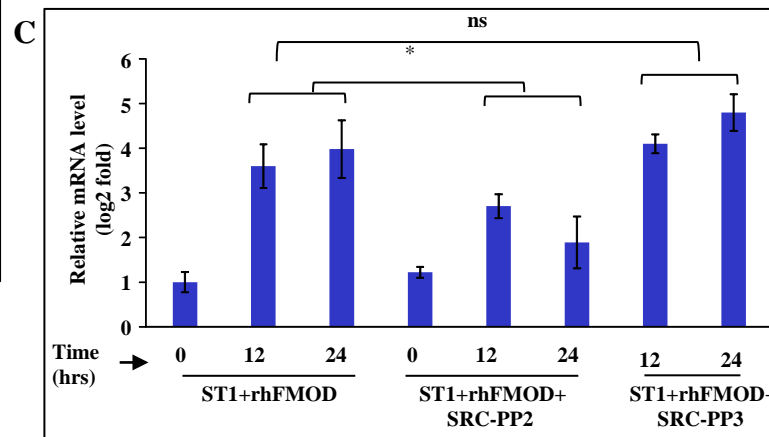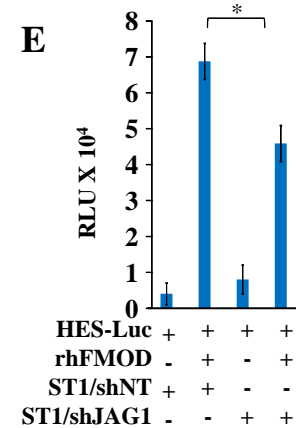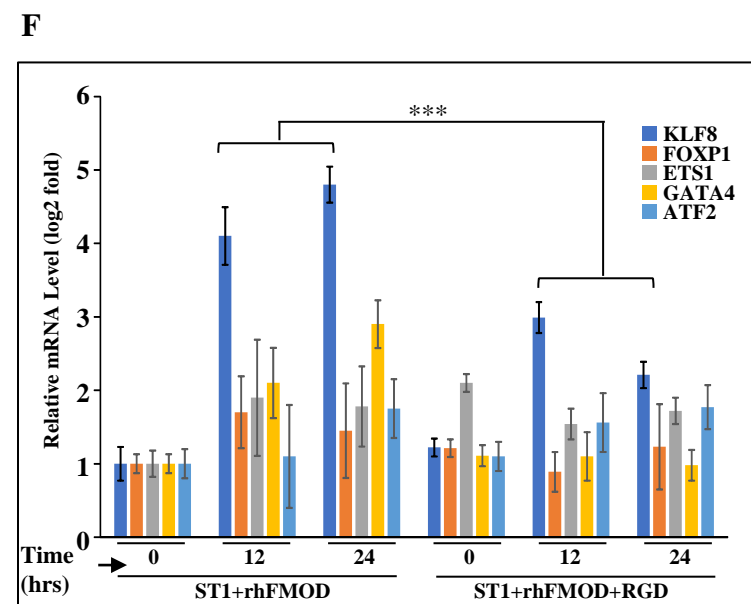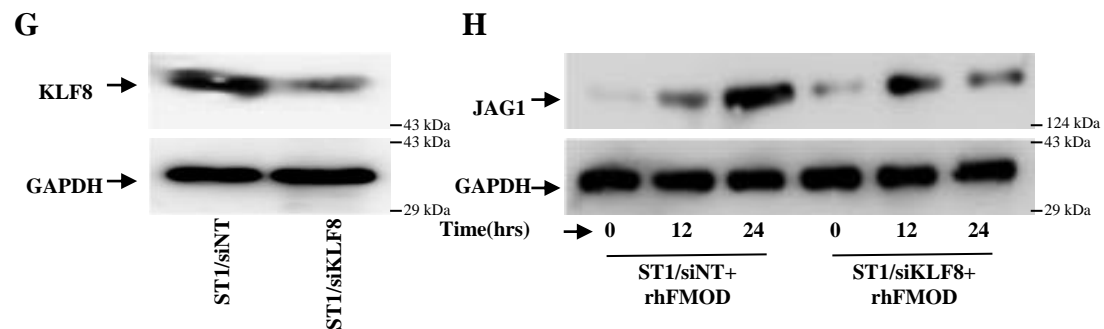

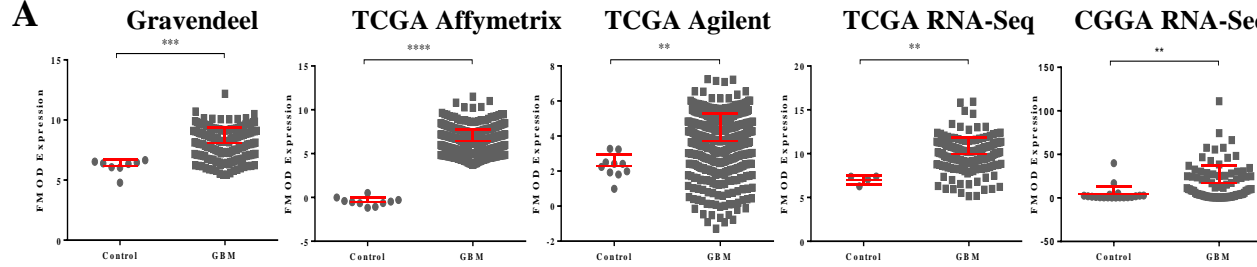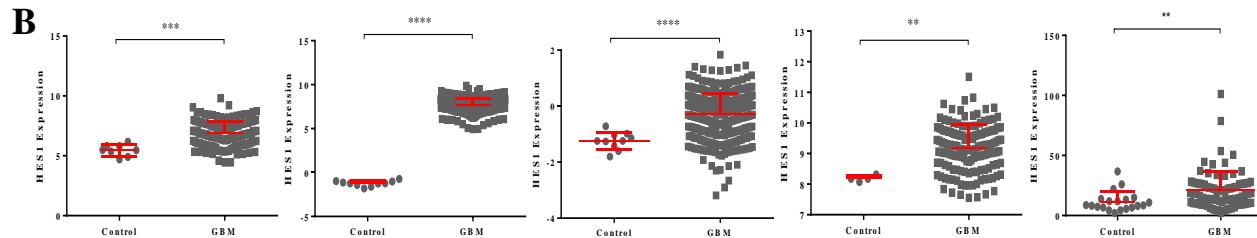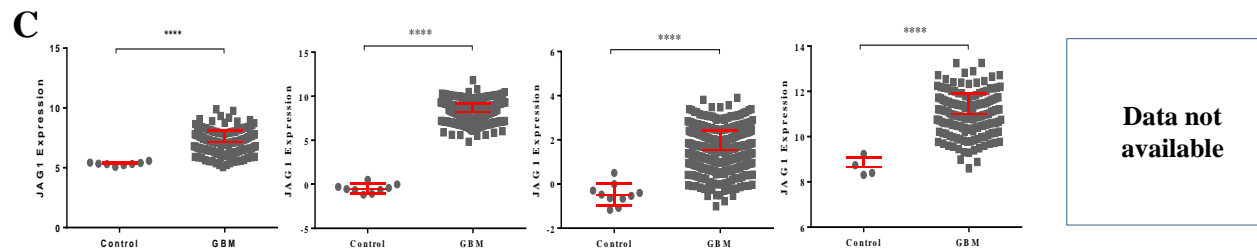

**D**

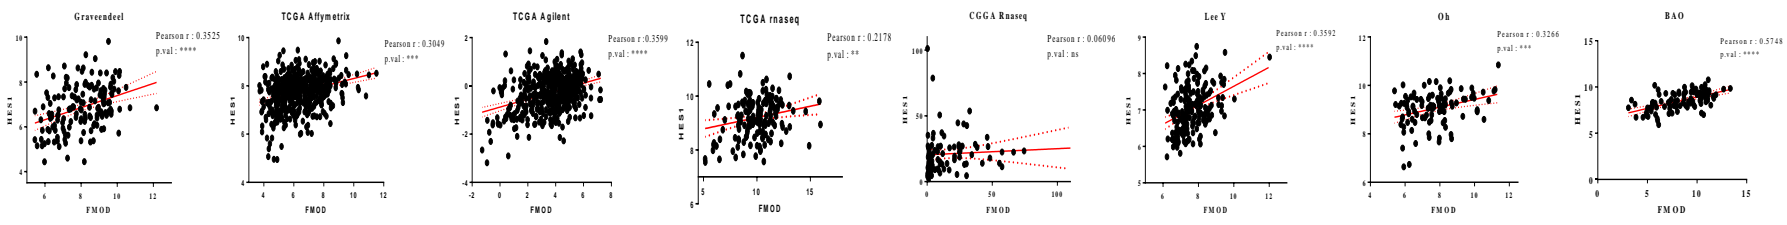

**E**

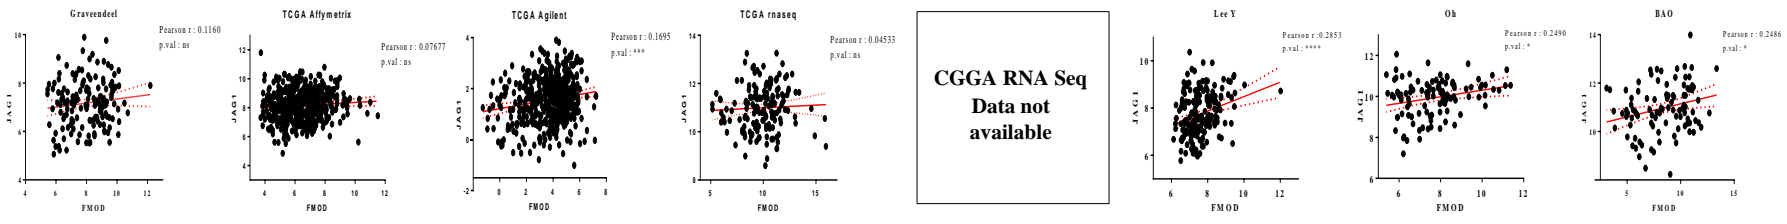

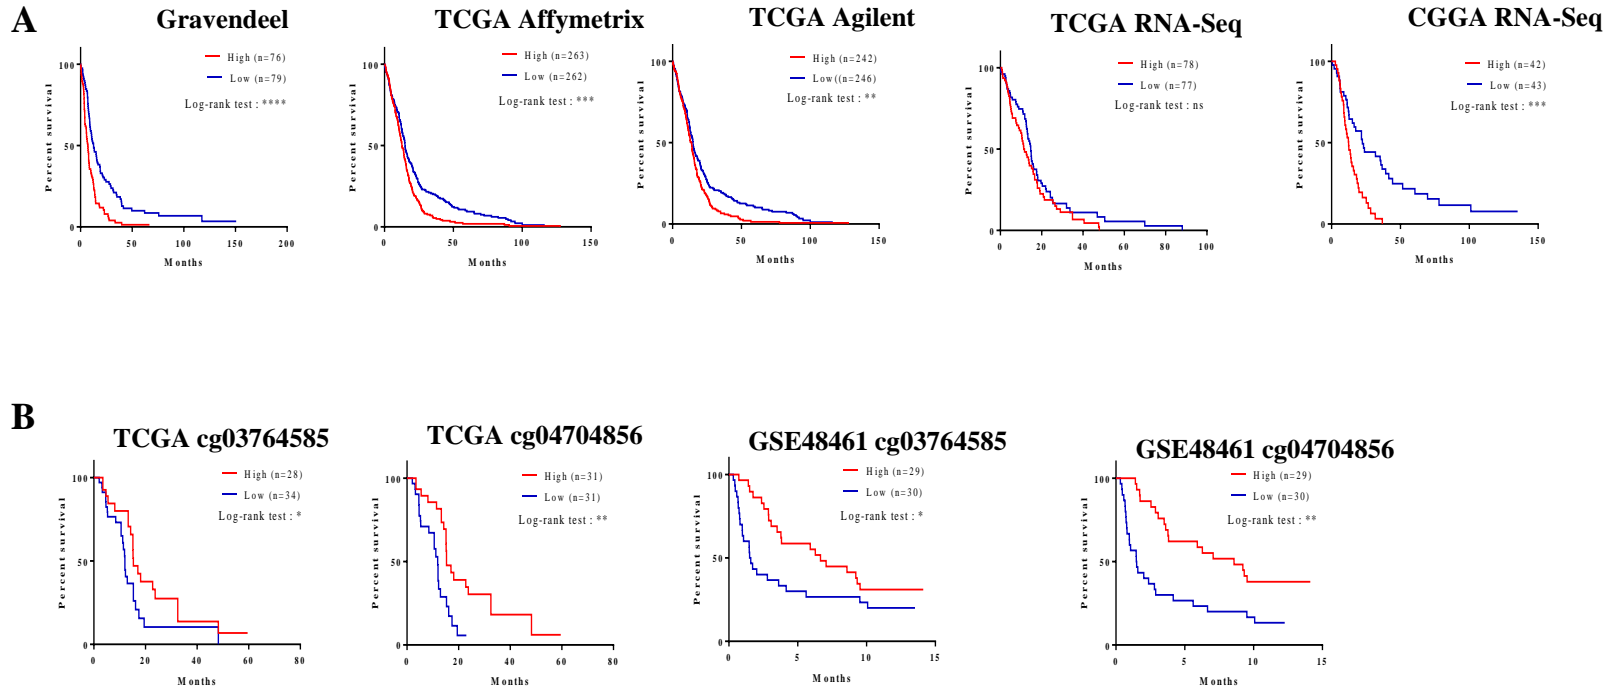

# **Supplementary figures 23 to 28**





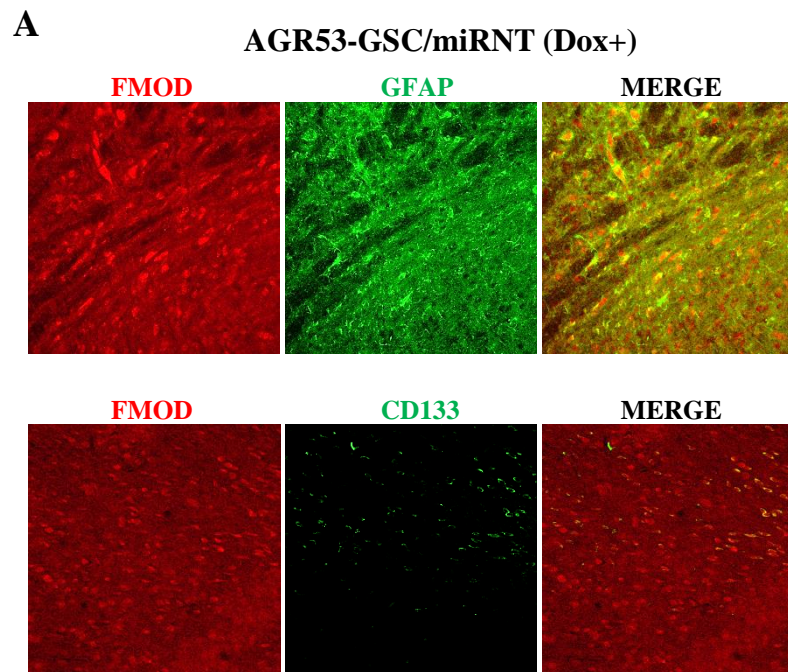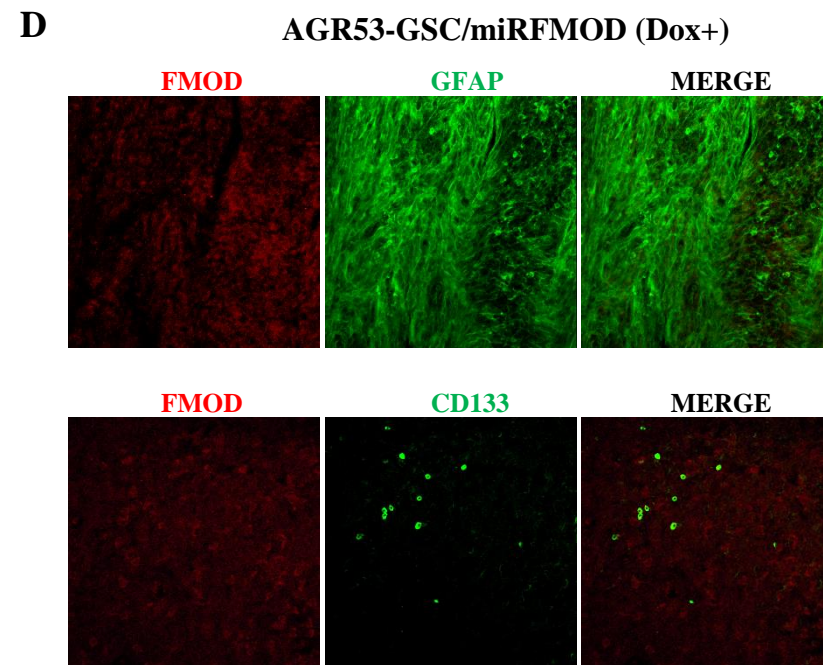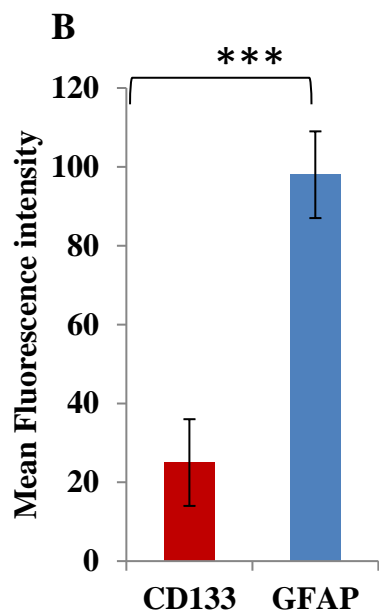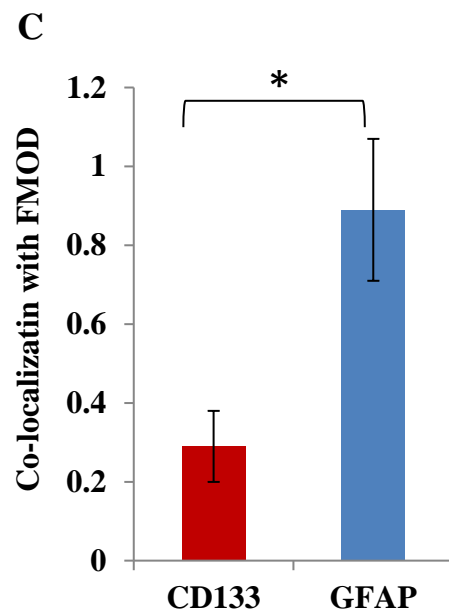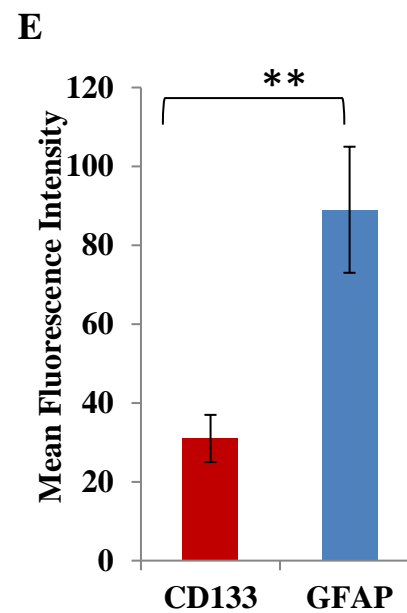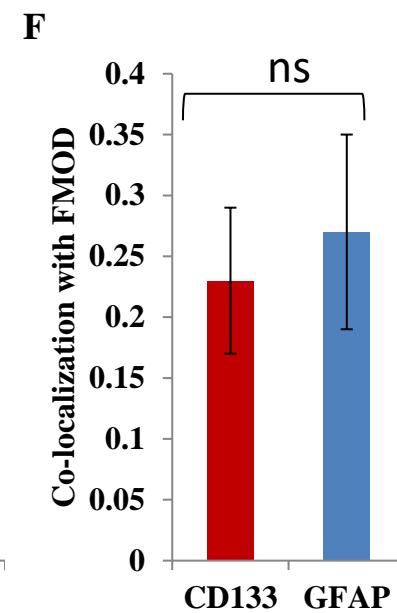

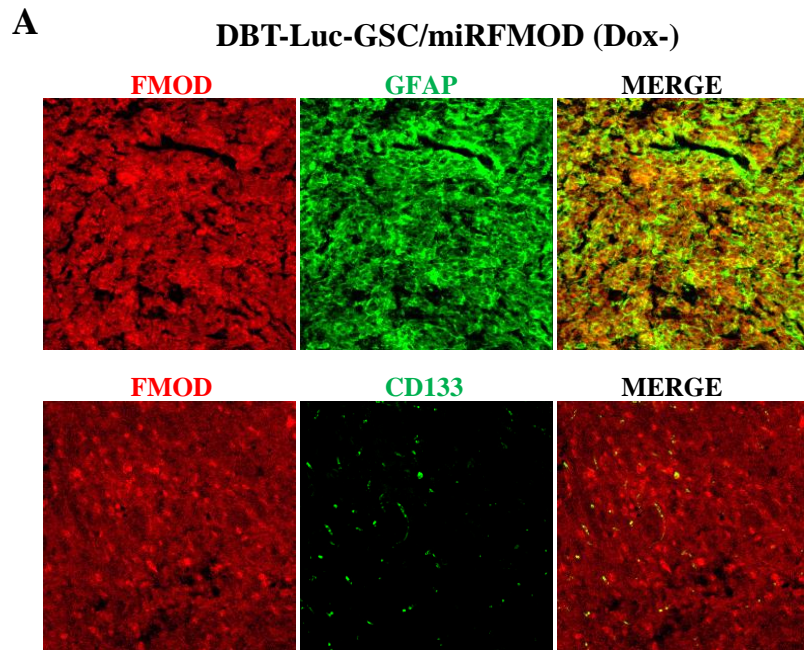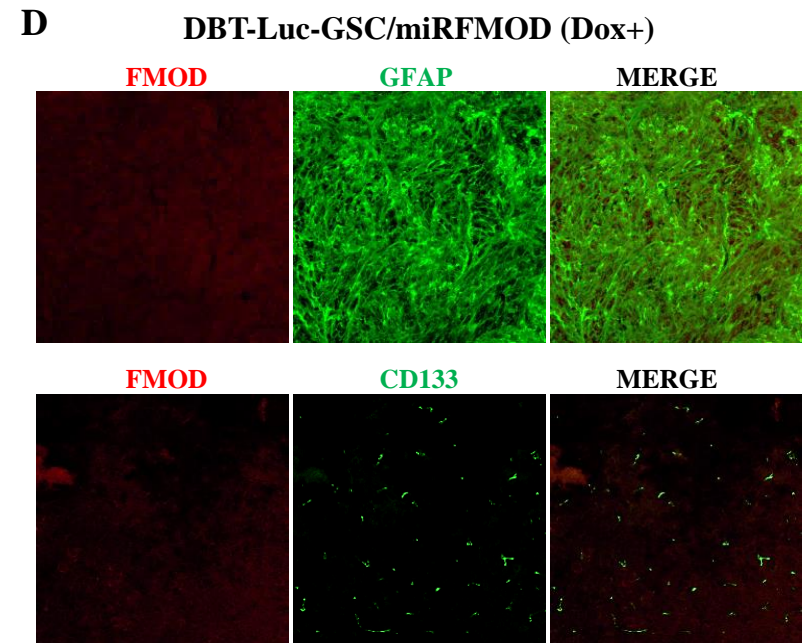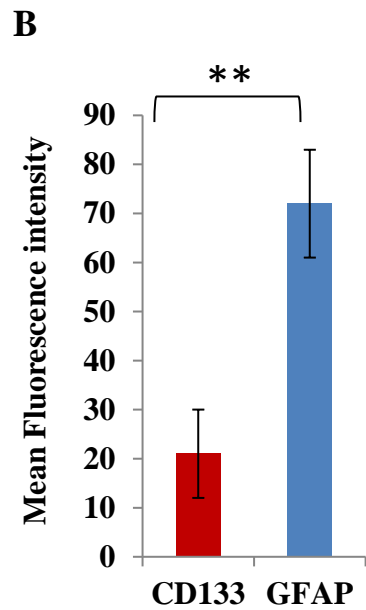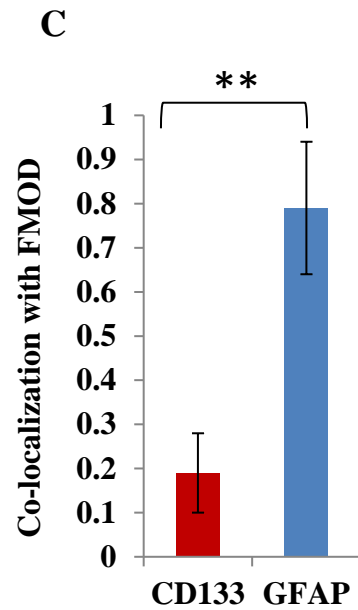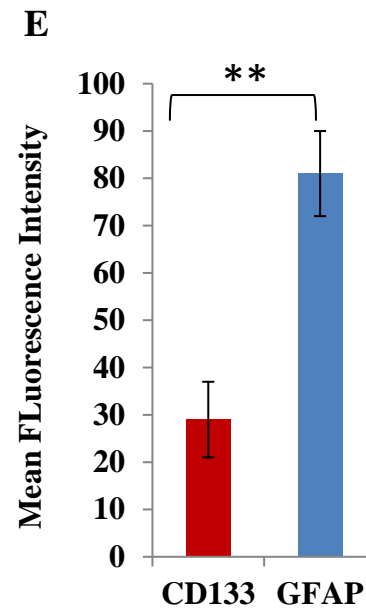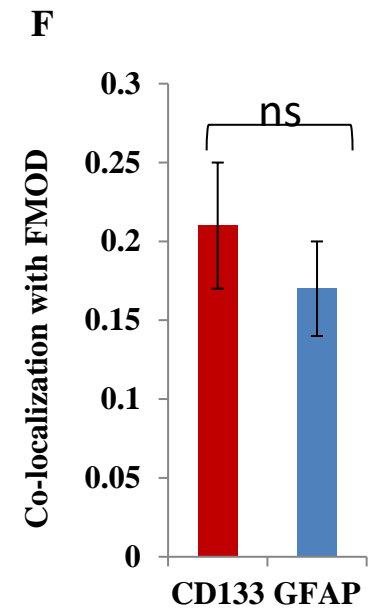

**A**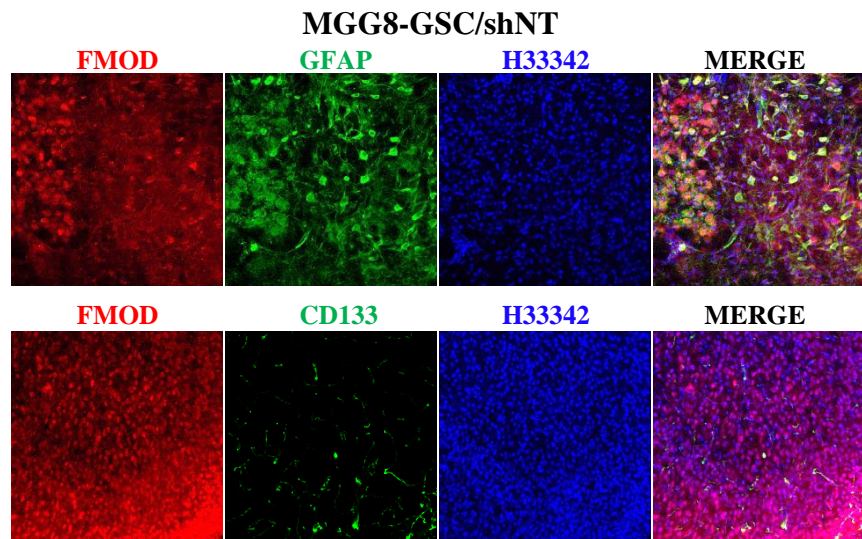**D**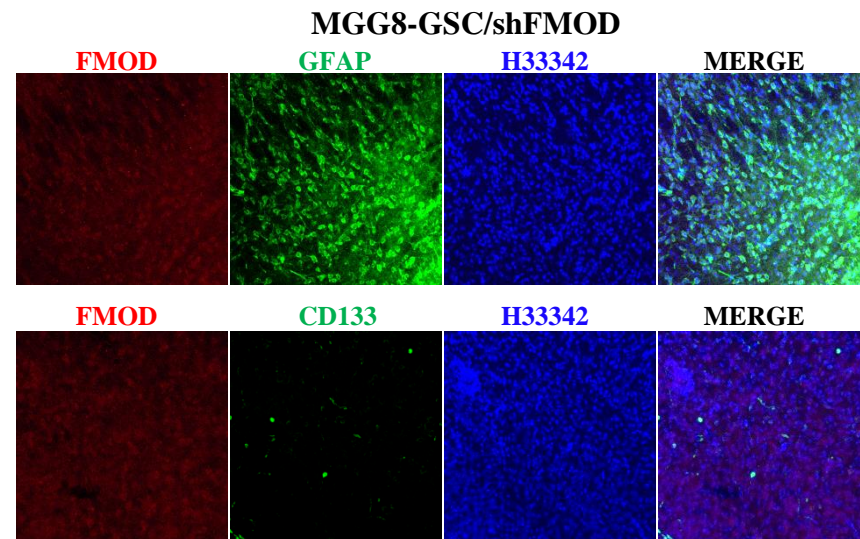**B**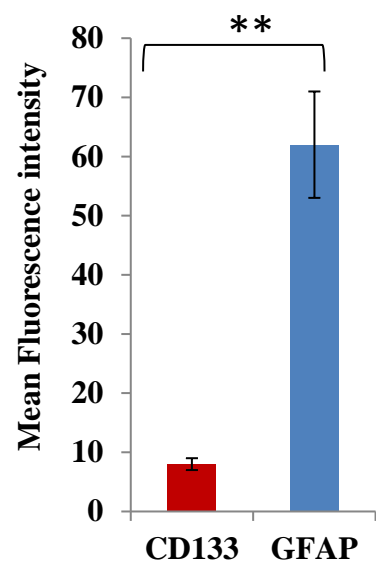**C**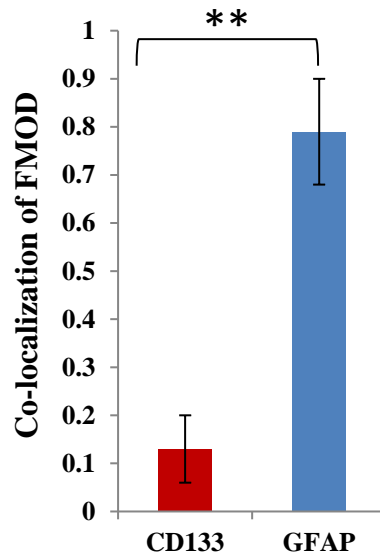**E**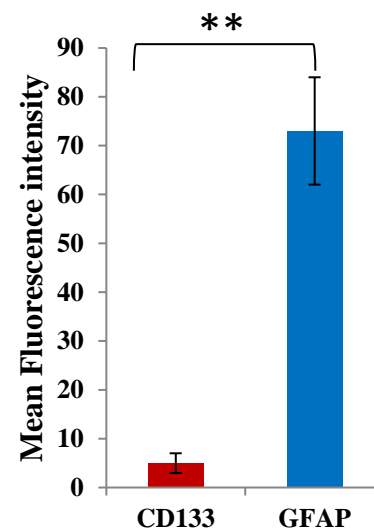**F**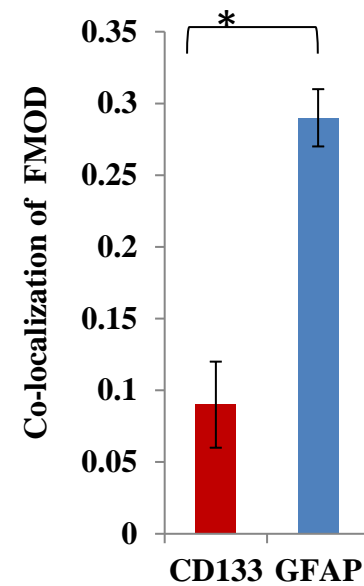



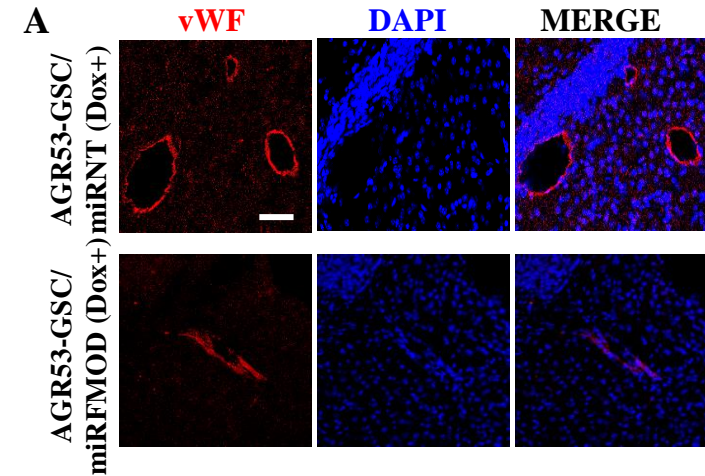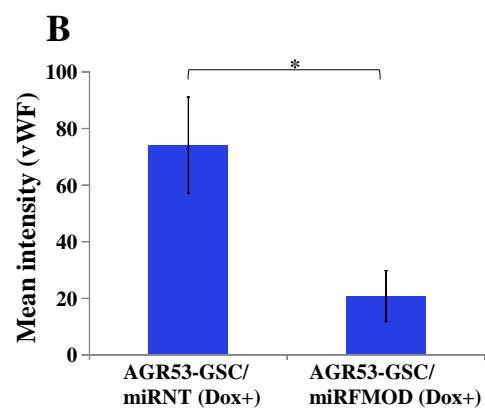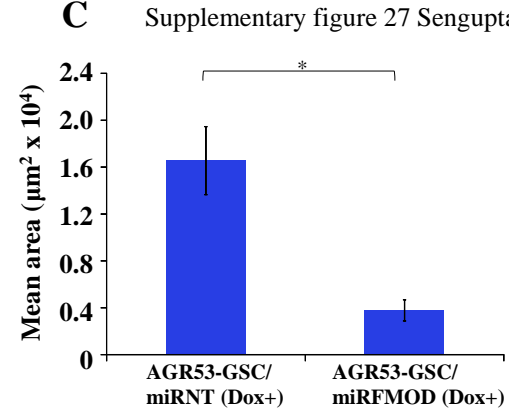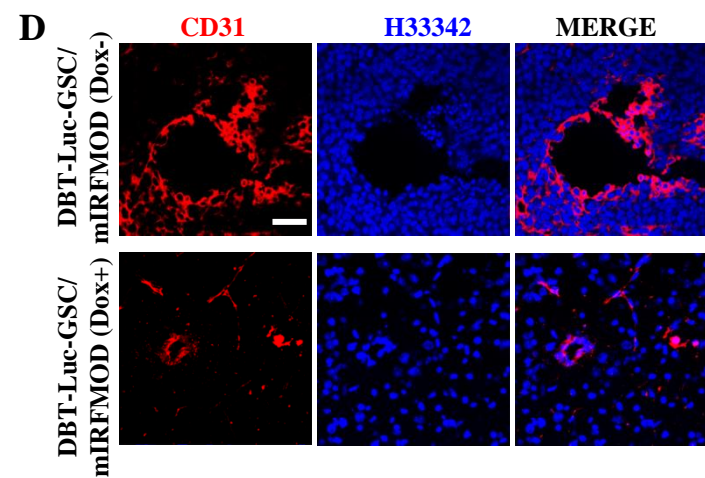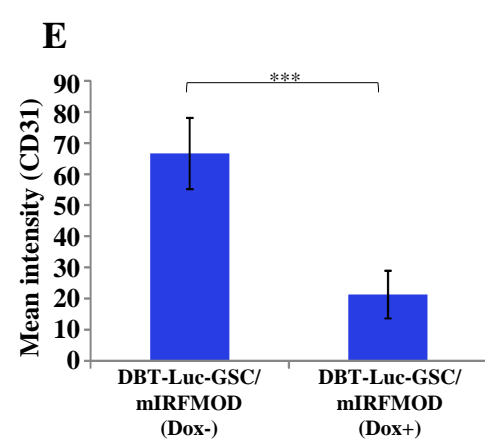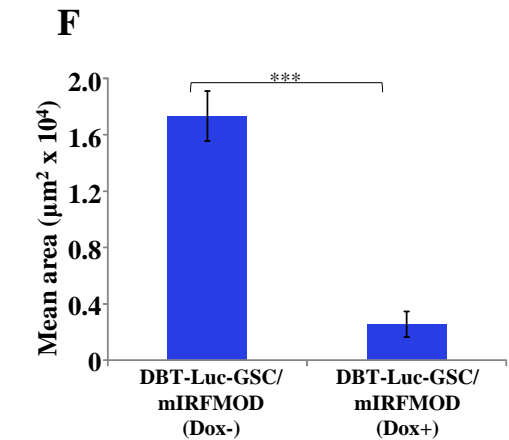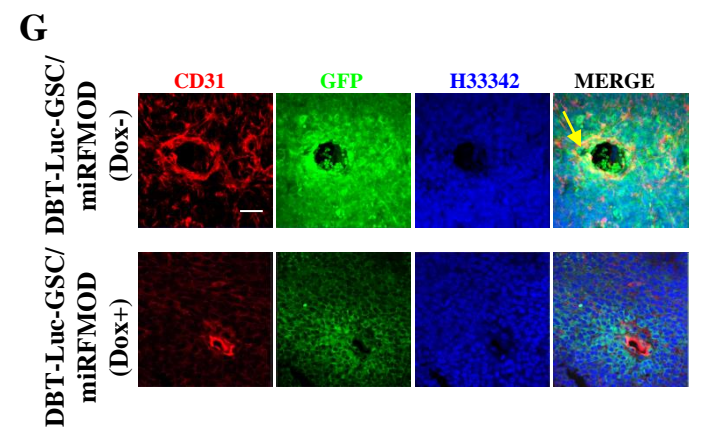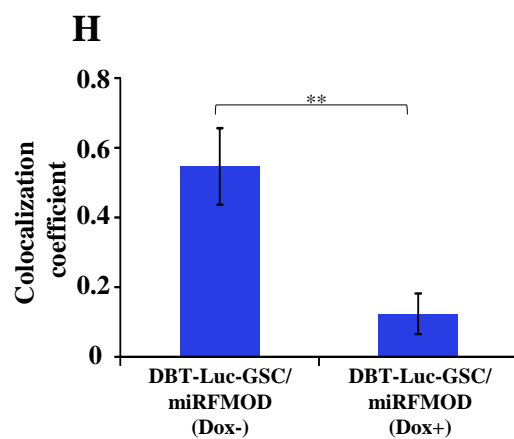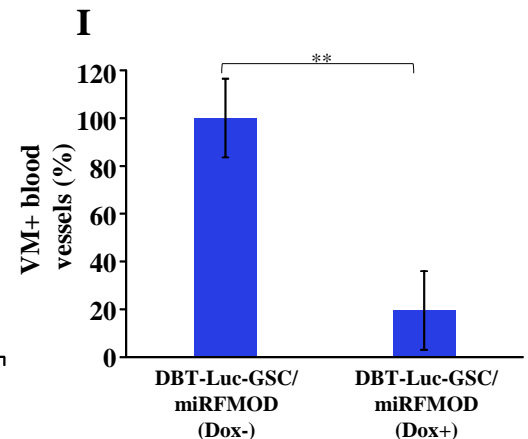

**A**

MGG8-GSC/shNT

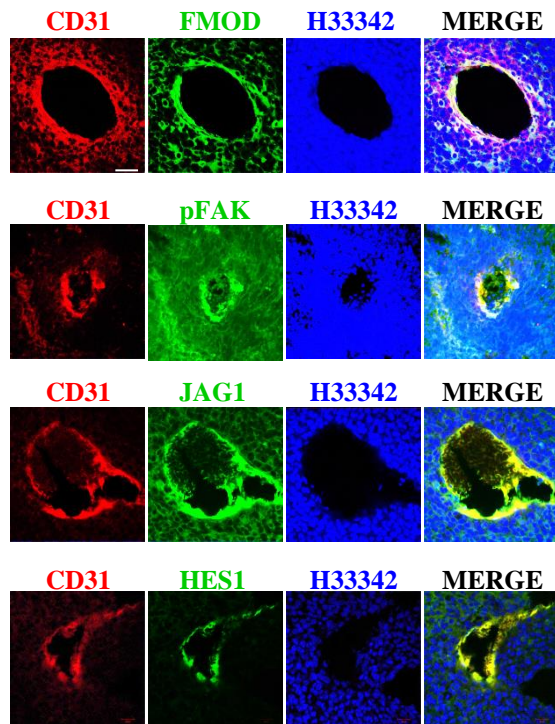**B**

AGR53-GSC/miRNT (Dox+)

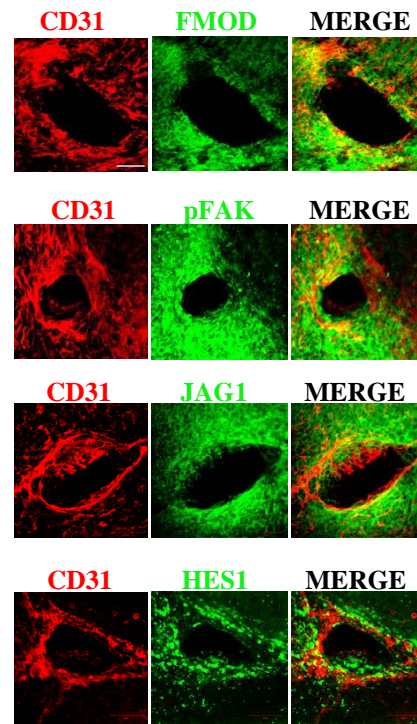**C**

DBT-Luc-GSC/miRFMOD (Dox-)

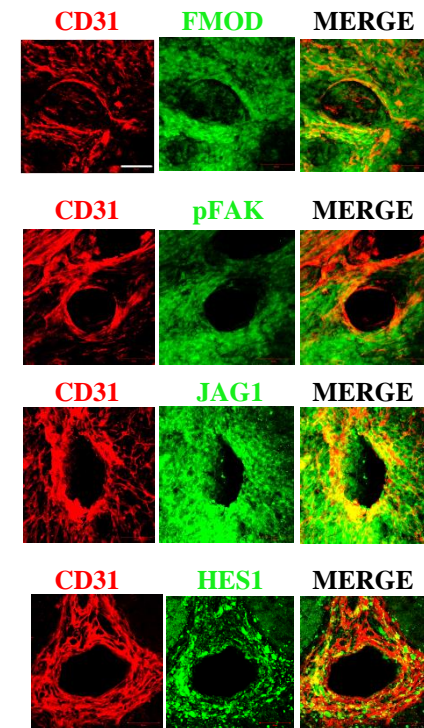

Source: https://www.biorxiv.org/content/10.1101/2022.04.03.486893v1.full.pdf
